# Supplementary material for: Synthesis and evaluation of the antitumor activity of polyhalo acridone derivatives
Source: Royal Society of Chemistry journal article supplement (doi:10.1039/c4ra12354a), 2015-01-01
Supplement: c4ra12354a1.pdf [file c4ra12354a1.pdf]

## Synthesis and antitumor-evaluation of polyhalo acridone derivatives

Chao Huang<sup>a,b</sup>, Sheng-Jiao Yan<sup>\*a</sup>, Xianghui Zeng<sup>a</sup>, Bo Sun<sup>c</sup>, Minbo Lan<sup>\*c</sup>, Jun Lin<sup>\*a</sup>

<sup>a</sup>*Key Laboratory of Medicinal Chemistry for Natural Resource (Yunnan University),  
Ministry of Education, School of Chemical Science and Technology, Yunnan University,  
Kunming 650091, PR China*

<sup>b</sup>*Key Laboratory of Ethnic Medicine Resource Chemistry, State Ethnic Affairs  
Commission & Ministry of Education, School of Chemical Science and Technology,  
Yunnan University of Nationalities, Kunming 650050, PR China*

<sup>c</sup>Shanghai Key Laboratory of Functional Materials Chemistry, School of Chemistry and  
Molecular Engineering, East China University of Science and Technology, Shanghai,  
200237, P. R. China

**E-mail:** [minbolan@ecust.edu.cn](mailto:minbolan@ecust.edu.cn) ;

**Fax:** +86-21-64253574 ; **Tel:** +86-21-64253574

\* Corresponding author. Tel. & fax: +86 871 65033215 (J. L.); e-mail:  
[linjun@ynu.edu.cn](mailto:linjun@ynu.edu.cn) (J. Lin)

## Supporting Information

### Table of Contents

|                                                                                                          |    |
|----------------------------------------------------------------------------------------------------------|----|
| General Method .....                                                                                     | 3  |
| The Data of the Polyhalo Isophthalonitrile <b>4</b> and <b>5</b> .....                                   | 5  |
| The Data of the Polyhalo Isophthalonitrile <b>4</b> .....                                                | 5  |
| The Data of the Polyhalo Isophthalonitrile <b>5</b> .....                                                | 10 |
| <sup>1</sup> H, <sup>13</sup> C and <sup>19</sup> F NMR Spectra of Compounds <b>4</b> and <b>5</b> ..... | 15 |
| References.....                                                                                          | 75 |

## General Method

All compounds were fully characterized by spectroscopic techniques. The NMR spectra were recorded on a Bruker-Avance 500 MHz spectrometer ( $^1\text{H}$ : 500 MHz,  $^{13}\text{C}$ : 125 MHz) with tetramethylsilane (TMS) as the internal standard ( $\delta$  0.0 ppm), chemical shifts ( $\delta$ ) are expressed in ppm, and  $J$  values are given in Hz. Deuterated DMSO and DMF were used as the solvent. IR spectra were recorded on a FT-IR Thermo Nicolet Avatar 360 using a KBr pellet. The reactions were monitored by thin layer chromatography (TLC) using neutral alumina. The melting points were determined on an XT-4A melting point apparatus and are uncorrected. HRMS was performed on an Agilent LC-MSD TOF instrument.

**1a**, **1c** and **2** were purchased from Adrich Corporation Limited. All chemicals and solvents were used as received without further purification unless otherwise stated. Column chromatography was performed on silica gel (200–300 mesh).

### *General procedure for the synthesis of polyhalo isophthalonitrile 3*

A 50 mL round-bottom flask was charged with polyhaloisophthalonitrile **1** (5 mmol), DMF (30 mL), aniline derivatives **2** (6.0 mmol), and potassium carbonate 1.4 g (10 mmol), and the solution was stirred for 0.5–18 h at room temperature until the polyhaloisophthalonitrile **1** was completely consumed. The mixture was dumped at beaker (100 mL) and quenched by the addition of water (30 mL). The mixture was filtered off and the residue was washed with water to give a crude product that was purified by flash column chromatography. The desired compounds **3** were formed in excellent yields: 84–96 %.

### *General procedure for the synthesis of polyhalo acridone with side chains containing amide group 4*

Polyhalo isophthalonitrile **3** (2 mmol) were dissolved in 6 mL 95–98 % sulfuric acid, and the solution was stirred for 1 h at 90 °C. The mixture was cooled to room temperature, and then was poured into 100 mL beaker, added 50 mL water under stirring. The pH of mixture was adjusted to 9–10 by solid potassium carbonate. The mixture was filtered off and the residue was washed with water to give a crude product that was purified by flash column chromatography. The desired compounds **4** were formed in good yields: 76–86 %.

***General procedure for the synthesis of polyhalo acridone with side chains containing cyano group 5***

Polyhalo acridone with side chains containing amide group **4** (2 mmol) were dissolved in 8 mL dry pyridine, phosphorus oxychloride (0.5 mL) was added under the ice bath, and the solution was stirred for 1 h until the Polyhalo acridone with side chains containing amide group **4** was completely consumed. The reaction mixture was added to a beaker filled with crushed ice, and neutralized by Na<sub>2</sub>CO<sub>3</sub> under stirring. The mixture was filtered off and the residue was washed with water to give a crude product that was purified by flash column chromatography. The desired compounds **5** were formed in good yields: 70–83 %.

## The Data of the Polyhalo Isophthalonitrile 4 and 5

### The Data of the Polyhalo Isophthalonitrile 4

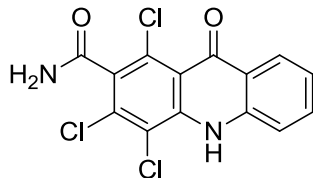

**1,3,4-Trichloro-9-oxo-9,10-dihydroacridine-2-carboxamide (4a)** <sup>[1]</sup>: yellow solid; mp: 251–252 °C; IR (KBr) ( $\nu_{\max}$ ,  $\text{cm}^{-1}$ ) 3478, 3416, 1665, 1568, 1398, 1326, 1164, 755, 612; <sup>1</sup>H NMR (500 MHz, DMSO-*d*<sub>6</sub>):  $\delta$  8.48–8.18 (m, 3H, PhH), 7.95–7.80 (m, 3H, NH<sub>2</sub>, PhH), 7.48 (br, 1H, NH); <sup>13</sup>C NMR (125 MHz, DMSO-*d*<sub>6</sub>):  $\delta$  162.7, 152.5, 148.5, 145.5, 132.2, 131.9, 130.7, 130.0, 129.2, 125.4, 124.4, 123.4, 115.1, 108.4; HRMS (TOF ES<sup>+</sup>): *m/z* calcd for C<sub>14</sub>H<sub>8</sub>Cl<sub>3</sub>N<sub>2</sub>O<sub>2</sub><sup>+</sup> [(M+H)<sup>+</sup>], 340.9646; found, 340.9644.

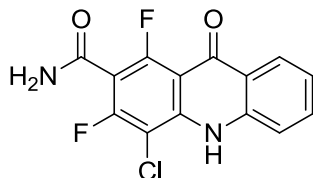

**4-Chloro-1,3-difluoro-9-oxo-9,10-dihydroacridine-2-carboxamide (4b)** <sup>[1]</sup>: yellow solid; mp: >300 °C; IR (KBr) ( $\nu_{\max}$ ,  $\text{cm}^{-1}$ ) 3486, 3371, 3246, 1679, 1559, 1382, 1260, 834, 759, 601  $\text{cm}^{-1}$ ; <sup>1</sup>H NMR (500 MHz, DMSO-*d*<sub>6</sub>):  $\delta$  8.52–7.77 (m, 6H, PhH, NH<sub>2</sub>), 7.46–7.43 (br, 1H, NH); <sup>13</sup>C NMR (125 MHz, DMSO-*d*<sub>6</sub>):  $\delta$  161.3, 156.2 (d, *J* = 267.5 Hz), 154.8 (d, *J* = 258.8 Hz), 151.8, 149.5, 145.2, 132.5, 129.1, 123.8, 123.4, 114.1, 111.6, 109.1 (t, *J* = 27.5 Hz), 101.2 (d, *J* = 32.5 Hz); <sup>19</sup>F NMR (470 MHz, DMSO-*d*<sub>6</sub>):  $\delta$  -111.3 (d, *J* = 4.7 Hz, 1F), -111.7 (d, *J* = 4.7 Hz, 1F); HRMS (TOF ES<sup>+</sup>): *m/z* calcd for C<sub>14</sub>H<sub>8</sub>ClF<sub>2</sub>N<sub>2</sub>O<sub>2</sub><sup>+</sup> [(M+H)<sup>+</sup>], 309.0237; found, 309.0233.

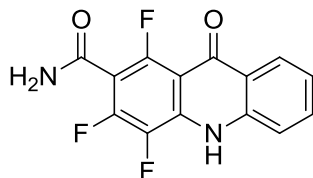

**1,3,4-Trifluoro-9-oxo-9,10-dihydroacridine-2-carboxamide (4c)** <sup>[1]</sup>: yellow solid; mp: >300 °C; IR (KBr) ( $\nu_{\max}$ ,  $\text{cm}^{-1}$ ) 3526, 3421, 3151, 1685, 1557, 1388, 1265, 967, 758,

602  $\text{cm}^{-1}$ ;  $^1\text{H}$  NMR (500 MHz,  $\text{DMSO-}d_6$ ):  $\delta$  8.53–7.78 (m, 6H, PhH,  $\text{NH}_2$ ), 7.44 (br, 1H, NH);  $^{13}\text{C}$  NMR (125 MHz,  $\text{DMSO-}d_6$ ):  $\delta$  161.0, 152.6 (d,  $J = 261.3$  Hz), 151.2, 149.4, 145.3 (d,  $J = 252.5$  Hz), 140.5 (d,  $J = 248.8$  Hz), 140.4, 132.4, 129.1, 123.7, 123.5, 114.1, 108.4 (t,  $J = 25.0$  Hz), 101.2; HRMS (TOF  $\text{ES}^+$ ):  $m/z$  calcd for  $\text{C}_{14}\text{H}_8\text{F}_3\text{N}_2\text{O}_2^+$  [(M+H) $^+$ ], 293.0532; found, 293.0529.

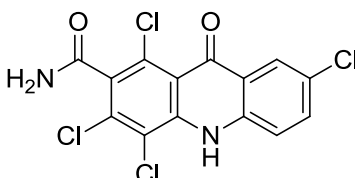

**1,3,4,7-Tetrachloro-9-oxo-9,10-dihydroacridine-2-carboxamide (4d)** <sup>[1]</sup>: yellow solid; mp:  $>300$   $^\circ\text{C}$ ; IR (KBr) ( $\nu_{\text{max}}$ ,  $\text{cm}^{-1}$ ) 3297, 1637, 1553, 1437, 1234, 1094, 824, 637, 508  $\text{cm}^{-1}$ ; HRMS (TOF  $\text{ES}^-$ )  $m/z$  calcd for  $\text{C}_{14}\text{H}_4\text{Cl}_4\text{N}_2\text{O}_2^{2-}$  [(M-2H) $^{2-}$ ], 371.9038; found, 371.9045.

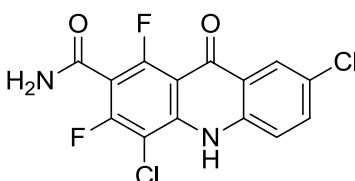

**4,7-dichloro-1,3-difluoro-9-oxo-9,10-dihydroacridine-2-carboxamide (4e)** <sup>[1]</sup>: yellow solid; mp:  $>300$   $^\circ\text{C}$ ; IR (KBr) ( $\nu_{\text{max}}$ ,  $\text{cm}^{-1}$ ) 3433, 3353, 3245, 1650, 1554, 1376, 1251, 1102, 834, 630  $\text{cm}^{-1}$ ;  $^1\text{H}$  NMR (500 MHz,  $\text{DMSO-}d_6$ ):  $\delta$  8.67 (br, 1H, NH), 8.28–7.74 (m, 5H, PhH,  $\text{NH}_2$ );  $^{13}\text{C}$  NMR (125 MHz,  $\text{DMSO-}d_6$ ):  $\delta$  161.0, 156.0 (d,  $J = 255.0$  Hz), 155.0 (d,  $J = 247.5$  Hz), 151.2, 147.9, 145.4, 132.9, 131.3, 128.2, 122.4, 114.6, 111.8, 109.9 (t,  $J = 26.3$  Hz), 101.2; HRMS (TOF  $\text{ES}^+$ ):  $m/z$  calcd for  $\text{C}_{14}\text{H}_7\text{Cl}_2\text{F}_2\text{N}_2\text{O}_2$  [(M+H) $^+$ ], 342.9847; found, 342.9845.

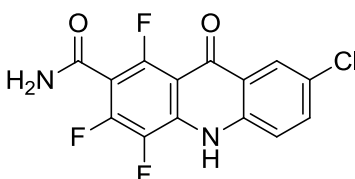

**7-Chloro-1,3,4-trifluoro-9-oxo-9,10-dihydroacridine-2-carboxamide (4f)**: yellow solid; mp: 181–185  $^\circ\text{C}$ ; IR (KBr) ( $\nu_{\text{max}}$ ,  $\text{cm}^{-1}$ ) 3494, 3347, 3181, 1661, 1558, 1376, 1117, 976, 829, 654  $\text{cm}^{-1}$ ;  $^1\text{H}$  NMR (500 MHz,  $\text{DMSO-}d_6$ ):  $\delta$  8.64 (br, 1H, NH), 8.29–7.73 (m,

5H, PhH, NH<sub>2</sub>); <sup>13</sup>C NMR (125 MHz, DMSO-*d*<sub>6</sub>): δ 160.8, 152.5 (d, *J* = 257.5 Hz), 150.7, 147.6, 145.6 (d, *J* = 247.5 Hz), 140.4 (d, *J* = 247.5 Hz), 140.3, 132.9, 131.0, 128.2, 122.4, 114.5, 109.1 (t, *J* = 25.0 Hz), 101.4; <sup>19</sup>F NMR (467 MHz, DMSO-*d*<sub>6</sub>): δ -115.4 (d, *J* = 14.1 Hz, 1F), -139.3 (s, 1F), -155.9 (d, *J* = 14.1 Hz, 1F); HRMS (TOF ES<sup>+</sup>): *m/z* calcd for C<sub>14</sub>H<sub>7</sub>ClF<sub>3</sub>N<sub>2</sub>O<sub>2</sub><sup>+</sup> [(M+H)<sup>+</sup>], 327.0143; found, 327.0140.

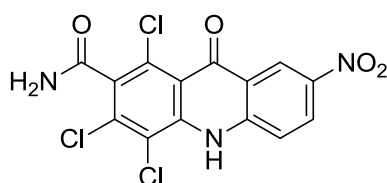

**1,3,4-Trichloro-7-nitro-9-oxo-9,10-dihydroacridine-2-carboxamide (4g):** yellow solid; mp: >300 °C; IR (KBr) (*v*<sub>max</sub>, cm<sup>-1</sup>) 3369, 1567, 1498, 1329, 1182, 849, 748 cm<sup>-1</sup>; <sup>1</sup>H NMR (500 MHz, DMF-*d*<sub>6</sub>): δ 9.21 (br, 1H, NH), 8.48–7.84 (m, 5H, PhH, NH<sub>2</sub>); HRMS (TOF ES<sup>-</sup>) *m/z* calcd for C<sub>14</sub>H<sub>4</sub>Cl<sub>3</sub>N<sub>3</sub>O<sub>4</sub><sup>2-</sup> [(M-2H)<sup>2-</sup>], 382.9278; found, 382.9278.

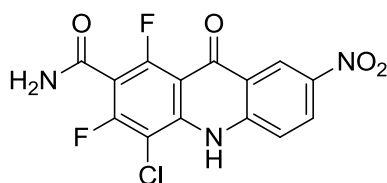

**4-Chloro-1,3-difluoro-7-nitro-9-oxo-9,10-dihydroacridine-2-carboxamide (4h):** yellow solid; mp: 219–221 °C; IR (KBr) (*v*<sub>max</sub>, cm<sup>-1</sup>) 3375, 1676, 1541, 1500, 1331, 1244, 1128, 914, 837, 745 cm<sup>-1</sup>; <sup>1</sup>H NMR (500 MHz, DMSO-*d*<sub>6</sub>): δ 9.60 (br, 1H, NH), 8.36–7.86 (m, 5H, PhH, NH<sub>2</sub>); <sup>13</sup>C NMR (125 MHz, DMSO-*d*<sub>6</sub>): δ 160.8, 157.0, 155.1, 154.5, 151.5, 147.0, 142.4, 130.5, 125.3, 122.5, 112.4, 112.1, 110.3 (t, *J* = 27.5 Hz), 101.7; HRMS (TOF ES<sup>-</sup>) *m/z* calcd for C<sub>14</sub>H<sub>4</sub>ClF<sub>2</sub>N<sub>3</sub>O<sub>4</sub><sup>2-</sup> [(M-2H)<sup>2-</sup>], 350.9869; found, 350.9878.

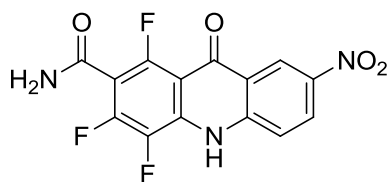

**1,3,4-Trifluoro-7-nitro-9-oxo-9,10-dihydroacridine-2-carboxamide (4i):** yellow solid; mp: >300 °C; IR (KBr) (*v*<sub>max</sub>, cm<sup>-1</sup>) 3409, 3233, 1656, 1501, 1332, 1252, 1127, 978, 616 cm<sup>-1</sup>; <sup>1</sup>H NMR (500 MHz, DMF-*d*<sub>6</sub>): δ 10.15 (br, 1H, NH), 9.74–8.17 (m, 5H, PhH, NH<sub>2</sub>); <sup>13</sup>C NMR (125 MHz, DMF-*d*<sub>6</sub>): δ 159.8, 159.0, 154.3 (d, *J* = 252.5 Hz), 150.1 (d, *J* =

251.3 Hz), 144.1, 143.1, 136.8 (d,  $J = 250.0$  Hz), 132.6, 130.3, 122.8, 121.3, 112.7, 111.8 (d,  $J = 20.0$  Hz), 101.5;  $^{19}\text{F}$  NMR (467 MHz, DMF- $d_6$ ):  $\delta$  -116.8 (s, 1F), -131.5 (d,  $J = 14.0$  Hz, 1F), -159.4 (s, 1F); HRMS (TOF ES $^-$ )  $m/z$  calcd for  $\text{C}_{14}\text{H}_4\text{F}_3\text{N}_3\text{O}_4^{2-}$  [(M-2H) $^{2-}$ ], 335.0165; found, 335.0176.

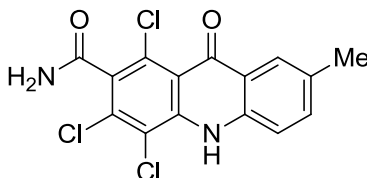

**1,3,4-Trichloro-7-methyl-9-oxo-9,10-dihydroacridine-2-carboxamide (4j):** yellow solid; mp:  $>300$  °C; IR (KBr) ( $\nu_{\text{max}}$ ,  $\text{cm}^{-1}$ ) 3389, 1682, 1631, 1456, 1329, 1258, 826, 648  $\text{cm}^{-1}$ ;  $^1\text{H}$  NMR (500 MHz, DMSO- $d_6$ ):  $\delta$  10.48 (br, 1H, NH), 8.30–7.65 (m, 5H, PhH, NH $_2$ ), 2.51–2.48 (m, 3H, CH $_3$ ); HRMS (TOF ES $^-$ )  $m/z$  calcd for  $\text{C}_{15}\text{H}_7\text{Cl}_3\text{N}_2\text{O}_2^{2-}$  [(M-2H) $^{2-}$ ], 351.9584; found, 351.9596.

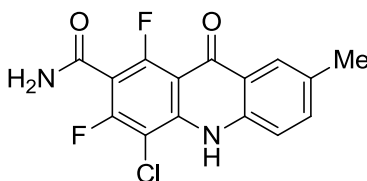

**4-Chloro-1,3-difluoro-7-methyl-9-oxo-9,10-dihydroacridine-2-carboxamide (4k):** yellow solid; mp:  $>300$  °C; IR (KBr) ( $\nu_{\text{max}}$ ,  $\text{cm}^{-1}$ ) 3358, 1634, 1556, 1372, 1258, 1047, 828, 630  $\text{cm}^{-1}$ ;  $^1\text{H}$  NMR (500 MHz, DMF- $d_6$ ): 7.65–6.88 (m, 6H, PhH, NH, NH $_2$ ), 2.33–2.12 (m, 3H, CH $_3$ ).  $^{13}\text{C}$  NMR (125 MHz, DMF- $d_6$ ):  $\delta$  160.8, 155.9 (d,  $J = 267.5$  Hz), 154.3 (d,  $J = 260.0$  Hz), 150.5, 147.6, 144.3, 133.9, 133.0, 128.3, 120.8, 113.5, 111.3, 108.7 (t,  $J = 26.3$  Hz), 100.6, 20.5;  $^{19}\text{F}$  NMR (467 MHz, DMF- $d_6$ ):  $\delta$  -112.9 (s, 1F), -113.4 (s, 1F); HRMS (TOF ES $^-$ )  $m/z$  calcd for  $\text{C}_{15}\text{H}_7\text{ClF}_2\text{N}_2\text{O}_2^{2-}$  [(M-2H) $^{2-}$ ], 320.0175; found, 320.0183.

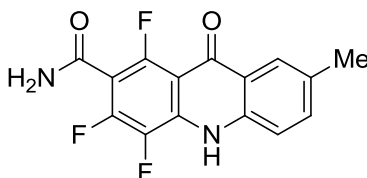

**1,3,4-Trifluoro-7-methyl-9-oxo-9,10-dihydroacridine-2-carboxamide (4l):** yellow solid; mp: 177–178 °C; IR (KBr) ( $\nu_{\text{max}}$ ,  $\text{cm}^{-1}$ ) 3394, 1658, 1562, 1467, 1375, 1268, 1134,



972, 628  $\text{cm}^{-1}$ ;  $^1\text{H}$  NMR (500 MHz, DMF- $d_6$ ):  $\delta$  8.39–7.65 (m, 6H, PhH, NH, NH<sub>2</sub>), 2.95–2.74 (m, 3H, CH<sub>3</sub>);  $^{13}\text{C}$  NMR (125 MHz, DMF- $d_6$ ):  $\delta$  161.7, 153.4 (d,  $J = 252.5$  Hz), 150.9, 148.9, 145.8 (d,  $J = 247.5$  Hz), 141.4 (d,  $J = 248.8$  Hz), 140.7, 134.9, 134.0, 129.5, 121.9, 114.6, 109.2 (t,  $J = 26.3$  Hz), 101.9 (d,  $J = 10.0$  Hz), 21.5;  $^{19}\text{F}$  NMR (467 MHz, DMF- $d_6$ ):  $\delta$  -117.5 (d,  $J = 18.7$  Hz, 1F), -142.5 (d,  $J = 18.7$  Hz, 1F), -157.7 (t,  $J = 14.0$  Hz, 1F); HRMS (TOF ES<sup>-</sup>)  $m/z$  calcd for C<sub>15</sub>H<sub>7</sub>F<sub>3</sub>N<sub>2</sub>O<sub>2</sub><sup>2-</sup> [(M-2H)<sup>2-</sup>], 304.0471; found, 304.0480.

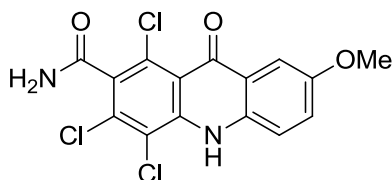

**1,3,4-Trichloro-7-hydroxy-9-oxo-9,10-dihydroacridine-2-carboxamide (4m):** yellow solid; mp: >300 °C; IR (KBr) ( $\nu_{\text{max}}$ ,  $\text{cm}^{-1}$ ) 3399, 1634, 1502, 1455, 1407, 1332, 1244, 837, 602;  $^1\text{H}$  NMR (500 MHz, DMF- $d_6$ ):  $\delta$  10.29 (br, 1H, NH), 8.43–7.55 (m, 5H, PhH, NH<sub>2</sub>), 3.08–2.74 (m, 1H, OH);  $^{13}\text{C}$  NMR (125 MHz, DMF- $d_6$ ):  $\delta$  166.1, 155.2, 150.3, 144.3, 143.8, 132.2, 131.1, 128.7, 125.5, 125.2, 116.6, 108.2, 103.2, 88.9; HRMS (TOF ES<sup>-</sup>)  $m/z$  calcd for C<sub>14</sub>H<sub>5</sub>Cl<sub>3</sub>N<sub>2</sub>O<sub>3</sub><sup>2-</sup> [(M-2H)<sup>2-</sup>], 353.9377; found, 353.9385.

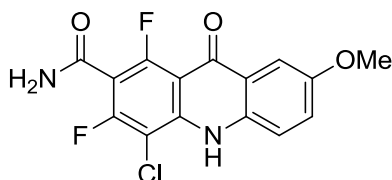

**4-Chloro-1,3-difluoro-7-hydroxy-9-oxo-9,10-dihydroacridine-2-carboxamide (4n):** yellow solid; mp: >300 °C; IR (KBr) ( $\nu_{\text{max}}$ ,  $\text{cm}^{-1}$ ) 3398, 1641, 1463, 1366, 1243, 1067, 835, 630;  $^1\text{H}$  NMR (500 MHz, DMF- $d_6$ ): 10.34 (br, 1H, NH), 8.36–6.82 (m, 5H, PhH, NH<sub>2</sub>), 2.99–2.73 (m, 1H, OH);  $^{13}\text{C}$  NMR (125 MHz, DMF- $d_6$ ):  $\delta$  161.3, 156.3 (d,  $J = 250.0$  Hz), 154.8, 152.3 (d,  $J = 317.5$  Hz), 150.0, 147.0, 144.6, 143.1, 125.8, 115.4, 114.7, 109.7, 103.4, 101.0;  $^{19}\text{F}$  NMR (467 MHz, DMF- $d_6$ ):  $\delta$  -112.5 (s, 1F), -113.2 (s, 1F); HRMS (TOF ES<sup>-</sup>)  $m/z$  calcd for C<sub>14</sub>H<sub>5</sub>ClF<sub>2</sub>N<sub>2</sub>O<sub>3</sub><sup>2-</sup> [(M-2H)<sup>2-</sup>], 321.9968; found, 321.9975.

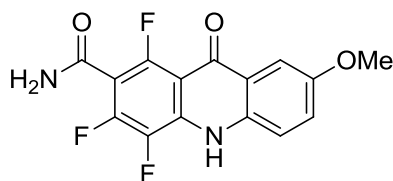

**1,3,4-Trifluoro-7-hydroxy-9-oxo-9,10-dihydroacridine-2-carboxamide (4o):** yellow solid; mp: 197–198 °C; IR (KBr) ( $\nu_{\max}$ ,  $\text{cm}^{-1}$ ) 3379, 1657, 1465, 1369, 1259, 1129, 977;  $^1\text{H}$  NMR (500 MHz,  $\text{DMF-}d_6$ ):  $\delta$  10.19 (br, 1H, NH), 8.36–7.54 (m, 5H, PhH,  $\text{NH}_2$ ), 3.09–2.57 (m, 1H, OH);  $^{13}\text{C}$  NMR (125 MHz,  $\text{DMF-}d_6$ ):  $\delta$  161.7, 155.1, 154.0, 152.0, 149.5, 145.6, 144.1, 139.2, 131.3, 126.1, 115.9, 109.2, 103.7, 101.6;  $^{19}\text{F}$  NMR (467 MHz,  $\text{DMF-}d_6$ ):  $\delta$  -117.9 (d,  $J = 14.1$  Hz, 1F), -143.7 (d,  $J = 14.0$  Hz, 1F), -157.7 (t,  $J = 14.0$  Hz, 1F); HRMS (TOF  $\text{ES}^-$ )  $m/z$  calcd for  $\text{C}_{14}\text{H}_5\text{F}_3\text{N}_2\text{O}_3^{2-}$  [(M-2H) $^{2-}$ ], 306.0263; found, 320.0272.

#### The Data of the Polyhalo Isophthalonitrile 5

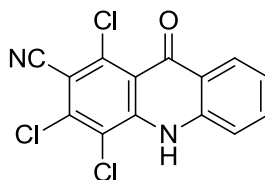

**1,3,4-Trichloro-9-oxo-9,10-dihydroacridine-2-carbonitrile (5a):** yellow solid; mp: 242–243 °C; IR (KBr) ( $\nu_{\max}$ ,  $\text{cm}^{-1}$ ) 3394, 2229, 1633, 1563, 1335, 1167, 756, 599  $\text{cm}^{-1}$ ;  $^1\text{H}$  NMR (500 MHz,  $\text{DMSO-}d_6$ ):  $\delta$  8.60–7.49 (m, 5H, PhH, NH);  $^{13}\text{C}$  NMR (125 MHz,  $\text{DMSO-}d_6$ ):  $\delta$  154.3, 149.2, 146.6, 137.4, 133.9, 131.4, 131.2, 129.6, 125.5, 124.2, 115.8, 115.6, 108.8, 106.6; HRMS (TOF  $\text{ES}^-$ )  $m/z$  calcd for  $\text{C}_{14}\text{H}_3\text{Cl}_3\text{N}_2\text{O}^{2-}$  [(M-2H) $^{2-}$ ], 319.9322; found, 321.9456.

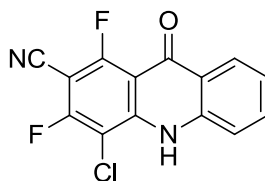

**4-Chloro-1,3-difluoro-9-oxo-9,10-dihydroacridine-2-carbonitrile (5b):** yellow solid; mp: >300 °C; IR (KBr) ( $\nu_{\max}$ ,  $\text{cm}^{-1}$ ) 3394, 2237, 1634, 1559, 1382, 1262, 1078, 760  $\text{cm}^{-1}$ ;  $^1\text{H}$  NMR (500 MHz,  $\text{DMF-}d_6$ ):  $\delta$  8.60–7.50 (m, 5H, PhH, NH);  $^{13}\text{C}$  NMR (125 MHz,

DMF-*d*<sub>6</sub>):  $\delta$  161.6, 154.8 (d,  $J = 260.0$  Hz), 153.0, 150.1, 146.6, 133.5, 129.3, 124.7, 123.3, 114.6, 112.4, 110.1, 100.5, 83.4 (t,  $J = 21.3$  Hz); <sup>19</sup>F NMR (467 MHz, DMF-*d*<sub>6</sub>):  $\delta$  -100.5 (s, 1F), -110.3 (s, 1F); HRMS (TOF ES<sup>-</sup>)  $m/z$  calcd for C<sub>14</sub>H<sub>4</sub>ClF<sub>2</sub>N<sub>2</sub>O<sup>-</sup> [(M-H)<sup>-</sup>], 288.9986; found, 288.9998.

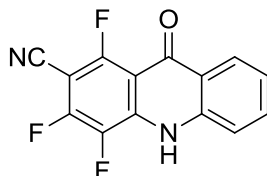

**1,3,4-Trifluoro-9-oxo-9,10-dihydroacridine-2-carbonitrile (5c):** yellow solid; mp: 196–197 °C; IR (KBr) ( $\nu_{\max}$ , cm<sup>-1</sup>) 3369, 3232, 2237, 1660, 1563, 1499, 1273, 1144, 981, 763, 598 cm<sup>-1</sup>; <sup>1</sup>H NMR (500 MHz, DMSO-*d*<sub>6</sub>):  $\delta$  8.57–7.51 (m, 5H, PhH, NH); <sup>13</sup>C NMR (125 MHz, DMSO-*d*<sub>6</sub>):  $\delta$  162.0, 159.9, 152.2, 149.8, 146.3, 142.1, 133.7, 129.1, 124.7, 123.8, 114.5, 110.5, 100.9, 82.4 (d,  $J = 32.5$  Hz); <sup>19</sup>F NMR (467 MHz, DMSO-*d*<sub>6</sub>):  $\delta$  -102.6 (d,  $J = 14.0$  Hz, 1F), -138.1 (s, 1F), -154.5 (t,  $J = 18.7$  Hz, 1F); HRMS (TOF ES<sup>-</sup>)  $m/z$  calcd for C<sub>14</sub>H<sub>3</sub>F<sub>3</sub>N<sub>2</sub>O<sup>2-</sup> [(M-2H)<sup>2-</sup>], 272.0208; found, 272.0216.

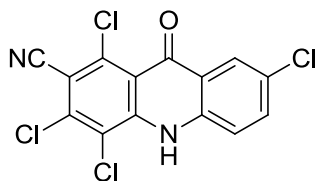

**1,3,4,7-Tetrachloro-9-oxo-9,10-dihydroacridine-2-carbonitrile (5d):** yellow solid; mp: 240–241 °C; IR (KBr) ( $\nu_{\max}$ , cm<sup>-1</sup>) 3403, 2235, 1636, 1555, 1312, 1253, 1085, 870, 610 cm<sup>-1</sup>; <sup>1</sup>H NMR (500 MHz, DMF-*d*<sub>6</sub>):  $\delta$  8.77–7.97 (m, 4H, PhH, NH); <sup>13</sup>C NMR (125 MHz, DMF-*d*<sub>6</sub>):  $\delta$  162.8, 159.5, 142.6, 138.4, 137.7, 135.0, 128.9, 125.2, 124.4, 122.2, 121.4, 116.6, 114.1, 109.5; HRMS (TOF ES<sup>-</sup>)  $m/z$  calcd for C<sub>14</sub>H<sub>5</sub>Cl<sub>3</sub>N<sub>2</sub>O<sup>-</sup> [(M-Cl)<sup>-</sup>], 321.9473; found, 321.9483.

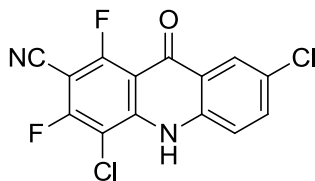

**4,7-Dichloro-1,3-difluoro-9-oxo-9,10-dihydroacridine-2-carbonitrile (5e):** yellow solid; mp: >300 °C; IR (KBr) ( $\nu_{\max}$ , cm<sup>-1</sup>) 3446, 2239, 1622, 1543, 1333, 1245, 1140, 841,

596  $\text{cm}^{-1}$ ;  $^1\text{H}$  NMR (500 MHz,  $\text{DMSO-}d_6$ ):  $\delta$  8.61–7.75 (m, 4H, PhH, NH);  $^{13}\text{C}$  NMR (125 MHz,  $\text{DMSO-}d_6$ ):  $\delta$  163.7 (dd,  $J_1 = 270.0$  Hz,  $J_2 = 8.8$  Hz), 154.7 (d,  $J = 243.8$  Hz), 152.0, 148.2, 146.5, 133.9, 131.2, 129.2, 122.7, 114.9, 112.2 (d,  $J = 13.8$  Hz), 110.3, 100.6 (d,  $J = 6.3$  Hz), 83.9 (t,  $J = 22.5$  Hz);  $^{19}\text{F}$  NMR (467 MHz,  $\text{DMSO-}d_6$ ):  $\delta$  -98.7 (s, 1F), -108.7 (s, 1F); HRMS (TOF ES $^-$ )  $m/z$  calcd for  $\text{C}_{14}\text{H}_2\text{Cl}_2\text{F}_2\text{N}_2\text{O}^{2-}$  [(M-2H) $^{2-}$ ], 321.9523; found, 321.9532.

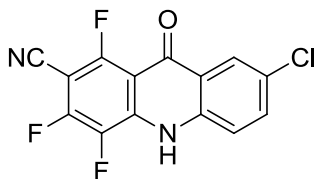

**7-Chloro-1,3,4-trifluoro-9-oxo-9,10-dihydroacridine-2-carbonitrile (5f):** yellow solid; mp: 240–241  $^{\circ}\text{C}$ ; IR (KBr) ( $\nu_{\text{max}}$ ,  $\text{cm}^{-1}$ ) 3452, 3216, 2923, 2234, 1663, 1559, 1500, 1248, 985, 833, 594  $\text{cm}^{-1}$ ;  $^1\text{H}$  NMR (500 MHz,  $\text{DMSO-}d_6$ ):  $\delta$  8.60–7.77 (m, 4H, PhH, NH);  $^{13}\text{C}$  NMR (125 MHz,  $\text{DMSO-}d_6$ ):  $\delta$  160.6 (d,  $J = 267.5$  Hz), 151.4, 148.1, 145.2 (dt,  $J_1 = 253.8$  Hz,  $J_2 = 8.8$  Hz), 142.1, 140.1 (d,  $J = 241.3$  Hz), 133.9, 131.2, 129.1, 122.7, 114.9, 110.3, 100.9 (d,  $J = 6.3$  Hz), 83.0 (t,  $J = 21.3$  Hz);  $^{19}\text{F}$  NMR (467 MHz,  $\text{DMSO-}d_6$ ):  $\delta$  -102.6 (d,  $J = 14.0$  Hz, 1F), -137.4 (d,  $J = 18.7$  Hz, 1F), -154.0 (t,  $J = 18.7$  Hz, 1F); HRMS (TOF ES $^-$ )  $m/z$  calcd for  $\text{C}_{14}\text{H}_2\text{ClF}_3\text{N}_2\text{O}^{2-}$  [(M-2H) $^{2-}$ ], 305.9819; found, 305.9830.

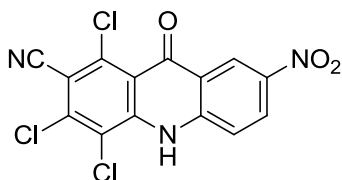

**1,3,4-Trichloro-7-nitro-9-oxo-9,10-dihydroacridine-2-carbonitrile (5g):** yellow solid; mp: 201–203  $^{\circ}\text{C}$ ; IR (KBr) ( $\nu_{\text{max}}$ ,  $\text{cm}^{-1}$ ) 3426, 3175, 2238, 1681, 1608, 1555, 1335, 1251, 743, 614  $\text{cm}^{-1}$ ; HRMS (TOF ES $^-$ )  $m/z$  calcd for  $\text{C}_{14}\text{H}_2\text{Cl}_3\text{N}_3\text{O}_3^{2-}$  [(M-2H) $^{2-}$ ], 364.9173; found, 364.9173.

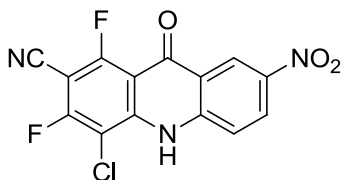

**4-Chloro-1,3-difluoro-7-nitro-9-oxo-9,10-dihydroacridine-2-carbonitrile (5h):** yellow solid; mp: 251–252 °C; IR (KBr) ( $\nu_{\max}$ ,  $\text{cm}^{-1}$ ) 3445, 2925, 2243, 1625, 1334, 1245, 742, 610  $\text{cm}^{-1}$ ; HRMS (TOF ES<sup>-</sup>)  $m/z$  calcd for  $\text{C}_{14}\text{H}_2\text{ClF}_2\text{N}_3\text{O}_3^{2-}$  [(M-2H)<sup>2-</sup>], 332.9764; found, 332.9775.

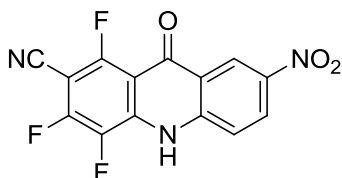

**1,3,4-Trifluoro-7-nitro-9-oxo-9,10-dihydroacridine-2-carbonitrile (5i):** yellow solid; mp: 255–256 °C; IR (KBr) ( $\nu_{\max}$ ,  $\text{cm}^{-1}$ ) 3443, 3369, 3268, 2241, 1655, 1500, 1335, 1254, 1142, 982, 609  $\text{cm}^{-1}$ ; <sup>1</sup>H NMR (500 MHz, DMF-*d*<sub>6</sub>):  $\delta$  9.78 (br, 1H, NH), 8.75–7.98 (m, 3H, PhH); <sup>13</sup>C NMR (125 MHz, DMF-*d*<sub>6</sub>):  $\delta$  159.2, 144.5 (d,  $J$  = 166.3 Hz), 144.4, 143.6, 136.3, 131.2, 129.2, 123.3, 122.8, 122.1, 120.7, 113.9, 108.7, 102.3; <sup>19</sup>F NMR (467 MHz, DMF-*d*<sub>6</sub>):  $\delta$  -103.6 (s, 1F), -130.3 (s, 1F), -164.7 (s, 1F); HRMS (TOF ES<sup>-</sup>)  $m/z$  calcd for  $\text{C}_{14}\text{H}_2\text{F}_3\text{N}_3\text{O}_3^{2-}$  [(M-2H)<sup>2-</sup>], 317.0059; found, 317.0068.

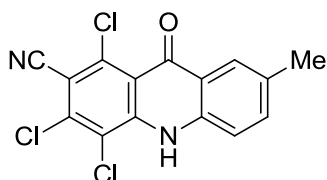

**1,3,4-Trichloro-7-methyl-9-oxo-9,10-dihydroacridine-2-carbonitrile (5j):** yellow solid; mp: 197–198 °C; IR (KBr) ( $\nu_{\max}$ ,  $\text{cm}^{-1}$ ) 3391, 2925, 2230, 1640, 1563, 1496, 1085, 831, 723, 553  $\text{cm}^{-1}$ ; <sup>1</sup>H NMR (500 MHz, DMF-*d*<sub>6</sub>):  $\delta$  10.83–10.09 (m, 1H, NH), 8.35–7.43 (m, 3H, PhH), 2.48–2.32 (m, 3H, CH<sub>3</sub>); <sup>13</sup>C NMR (125 MHz, DMF-*d*<sub>6</sub>):  $\delta$  159.1, 140.3, 139.4, 138.4, 137.7, 137.1, 134.5, 123.7, 122.1, 119.7, 114.6, 113.5, 110.5, 109.1, 20.8; HRMS (TOF ES<sup>-</sup>)  $m/z$  calcd for  $\text{C}_{15}\text{H}_5\text{Cl}_3\text{N}_2\text{O}^{2-}$  [(M-2H)<sup>2-</sup>], 333.9478; found, 333.9486.

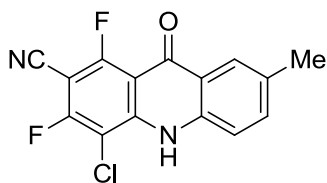

**4-Chloro-1,3-difluoro-7-methyl-9-oxo-9,10-dihydroacridine-2-carbonitrile (5k):** yellow solid; mp: 237–238 °C; IR (KBr) ( $\nu_{\max}$ ,  $\text{cm}^{-1}$ ) 3344, 2924, 2235, 1639, 1548, 1391,

1296, 1083, 866, 619  $\text{cm}^{-1}$ ;  $^1\text{H}$  NMR (500 MHz,  $\text{DMF-}d_6$ ):  $\delta$  8.29-7.65 (m, 4H, PhH, NH), 2.54-2.46 (m, 3H,  $\text{CH}_3$ );  $^{13}\text{C}$  NMR (125 MHz,  $\text{DMF-}d_6$ ):  $\delta$  155.7, 149.9, 142.7, 136.4, 136.2, 129.2, 125.7, 124.5, 122.6, 122.6, 119.3, 110.6, 108.6, 88.7, 21.6;  $^{19}\text{F}$  NMR (467 MHz,  $\text{DMF-}d_6$ ):  $\delta$  -102.9 (s, 1F), -104.0 (s, 1F); HRMS (TOF ES $^-$ )  $m/z$  calcd for  $\text{C}_{15}\text{H}_6\text{ClF}_2\text{N}_2\text{O}^-$  [(M-H) $^-$ ], 303.0142; found, 303.0153.

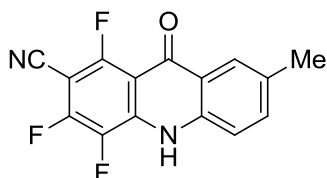

**1,3,4-Trifluoro-7-methyl-9-oxo-9,10-dihydroacridine-2-carbonitrile (51):** yellow solid; mp: 213–214  $^\circ\text{C}$ ; IR (KBr) ( $\nu_{\text{max}}$ ,  $\text{cm}^{-1}$ ) 3387, 2925, 2235, 1658, 1562, 1388, 1266, 1047, 609  $\text{cm}^{-1}$ ;  $^1\text{H}$  NMR (500 MHz,  $\text{DMF-}d_6$ ):  $\delta$  9.02–7.72 (m, 4H, PhH, NH), 2.53 (s, 3H,  $\text{CH}_3$ );  $^{13}\text{C}$  NMR (125 MHz,  $\text{DMF-}d_6$ ):  $\delta$  160.6, 152.0, 149.2, 142.2, 142.1, 140.1, 136.1, 135.1, 129.6, 122.4, 114.9, 110.6, 101.5, 82.9, 21.5;  $^{19}\text{F}$  NMR (467 MHz,  $\text{DMF-}d_6$ ):  $\delta$  -104.6 (d,  $J = 14.0$  Hz, 1F), -140.3 (d,  $J = 18.7$  Hz, 1F), -155.5 (t,  $J = 14.0$  Hz, 1F); HRMS (TOF ES $^-$ )  $m/z$  calcd for  $\text{C}_{15}\text{H}_5\text{F}_3\text{N}_2\text{O}^{2-}$  [(M-2H) $^{2-}$ ], 286.0365; found, 286.0378.

$^1\text{H}$ ,  $^{13}\text{C}$  and  $^{19}\text{F}$  NMR Spectra of Compounds 4 and 5

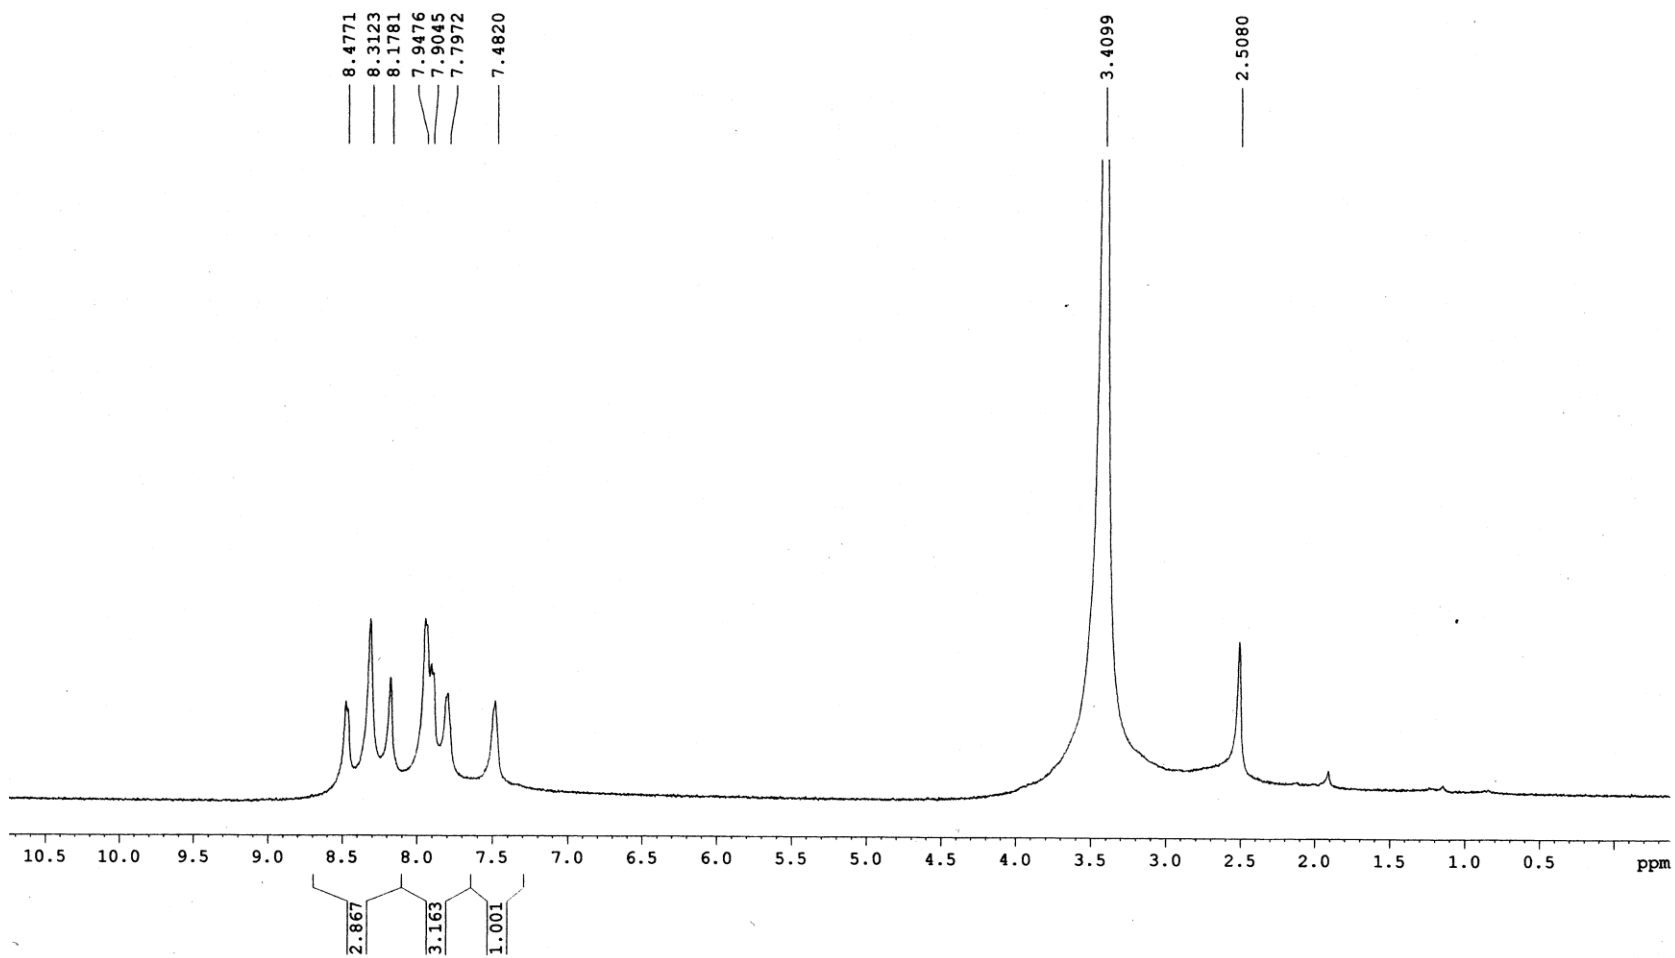

Figure 1.  $^1\text{H}$  NMR (500 MHz, DMSO- $d_6$ ) spectra of compound 4a

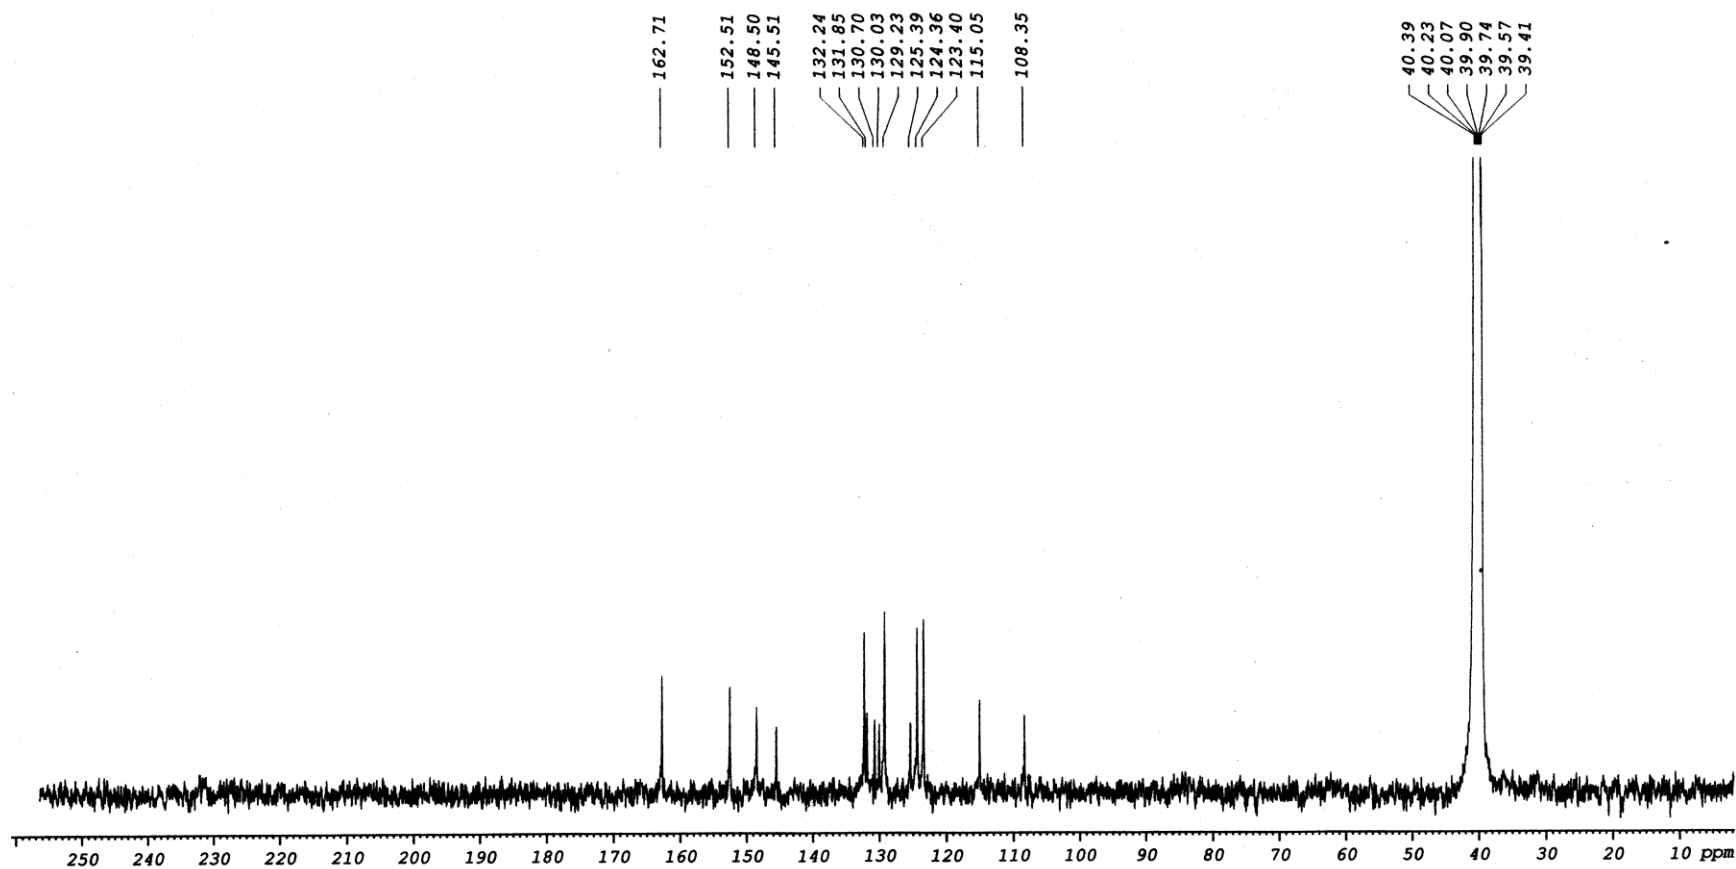

Figure 2.  $^{13}\text{C}$  NMR (125 MHz,  $\text{DMSO-}d_6$ ) spectra of compound 4a



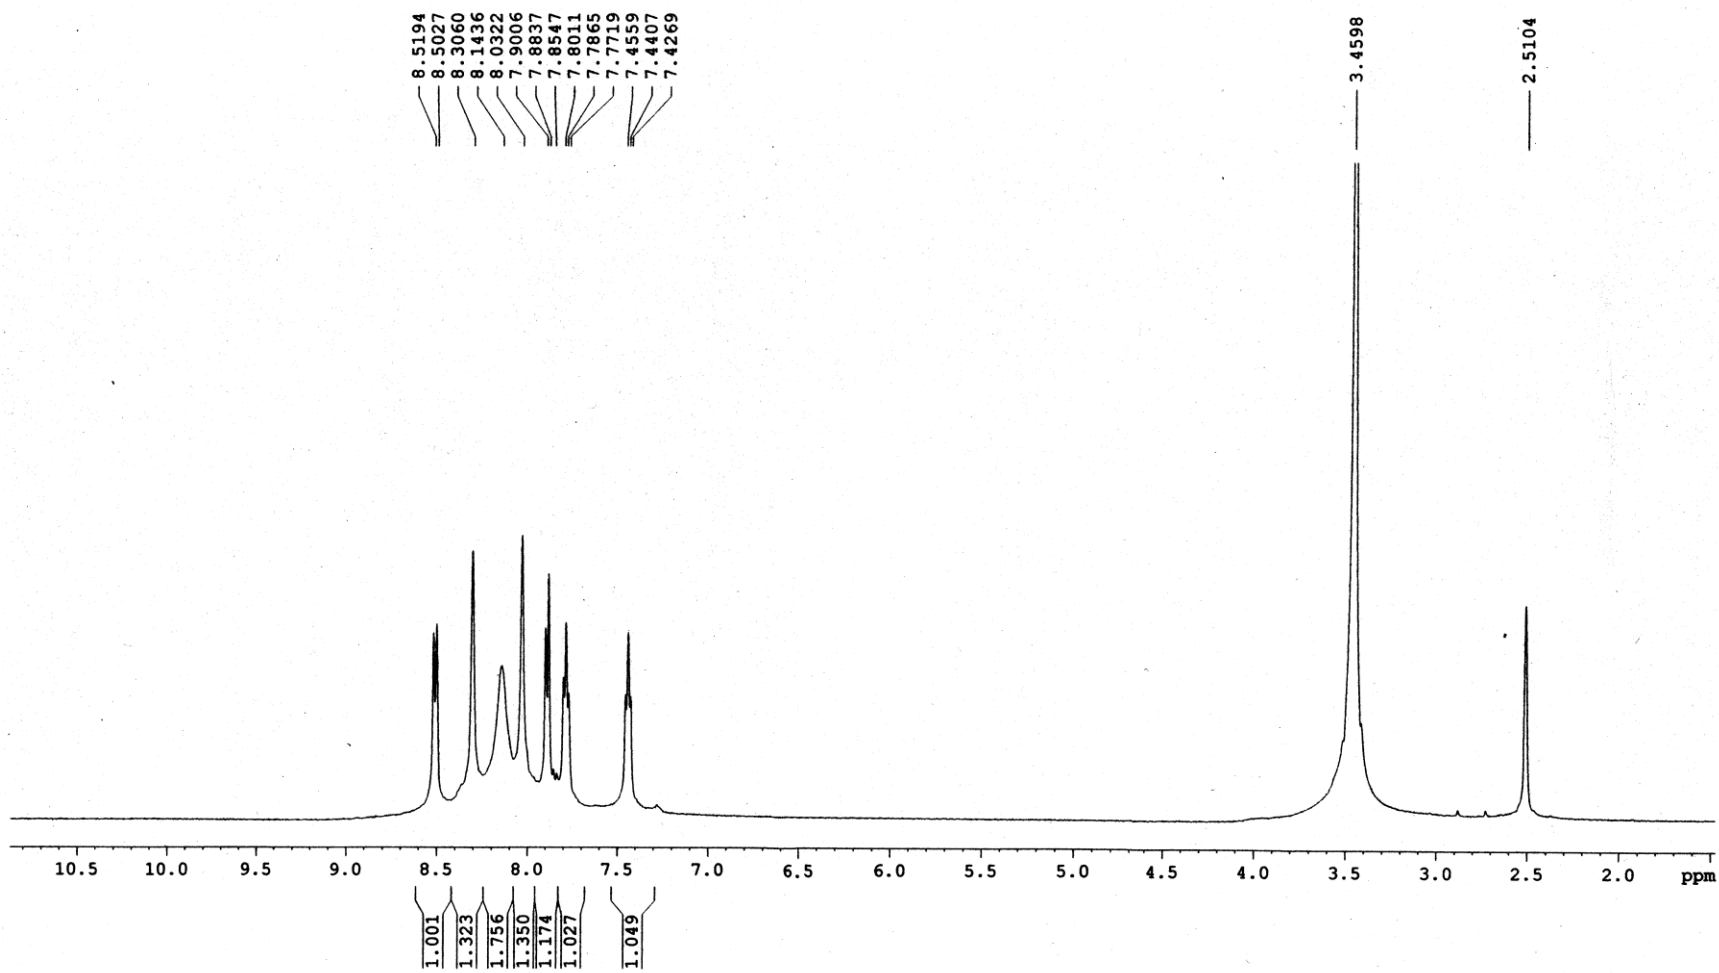

**Figure 3.**  $^1\text{H}$  NMR (500 MHz,  $\text{DMSO}-d_6$ ) spectra of compound **4b**

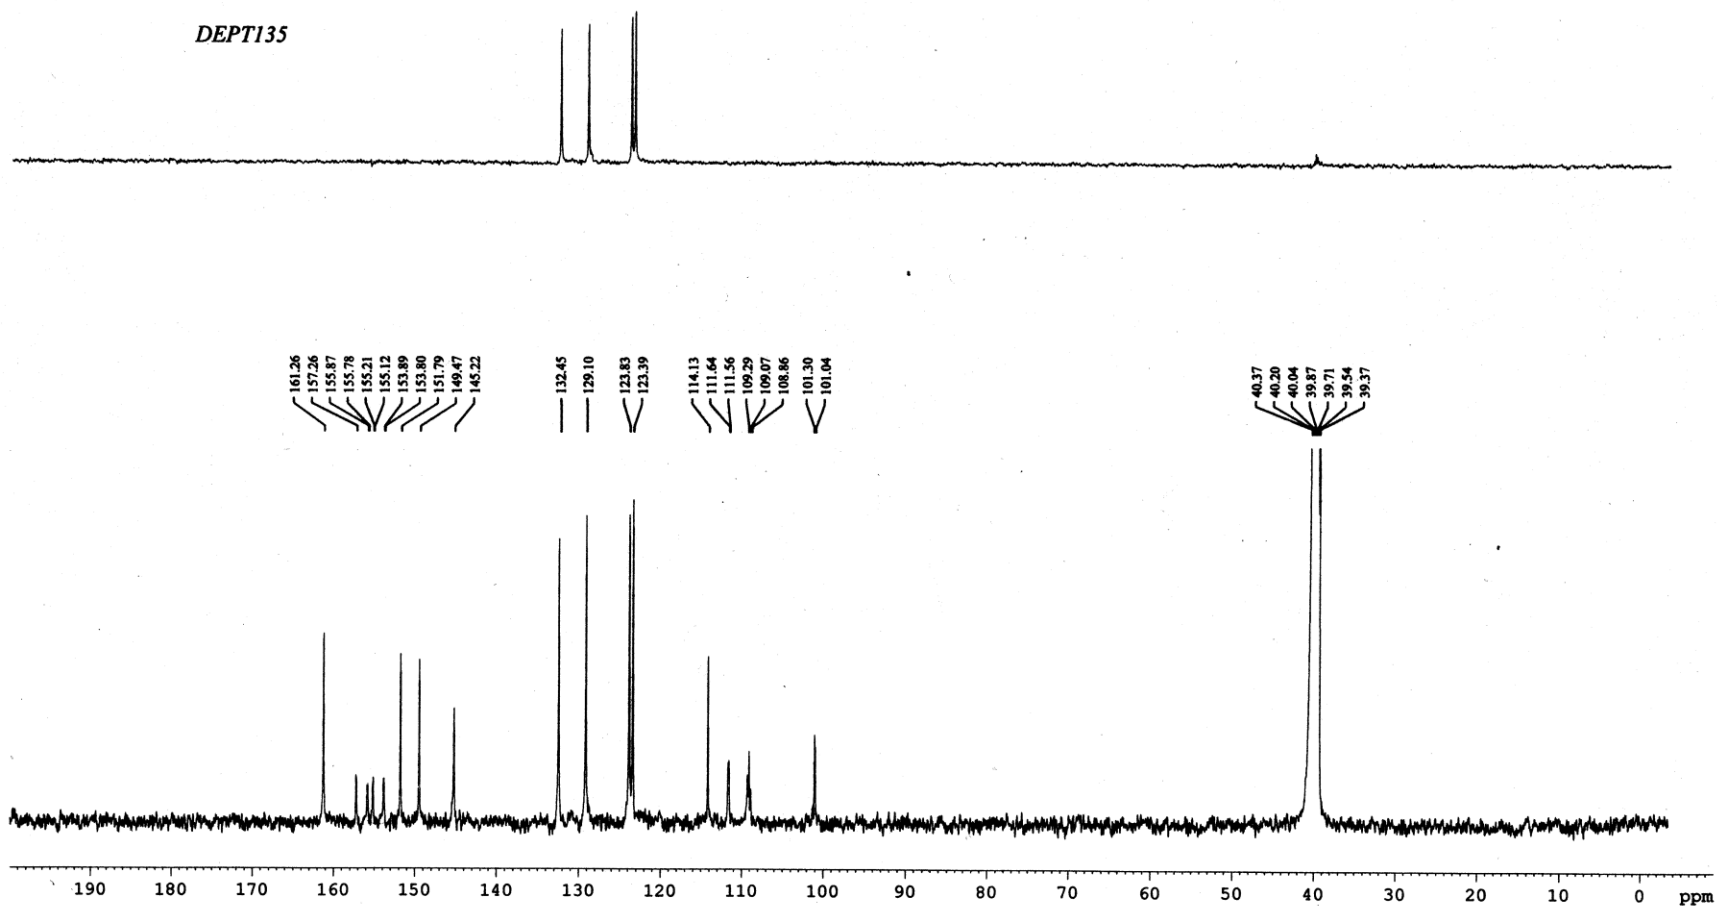

Figure 4.  $^{13}\text{C}$  NMR (125 MHz,  $\text{DMSO-}d_6$ ) spectra of compound **4b**

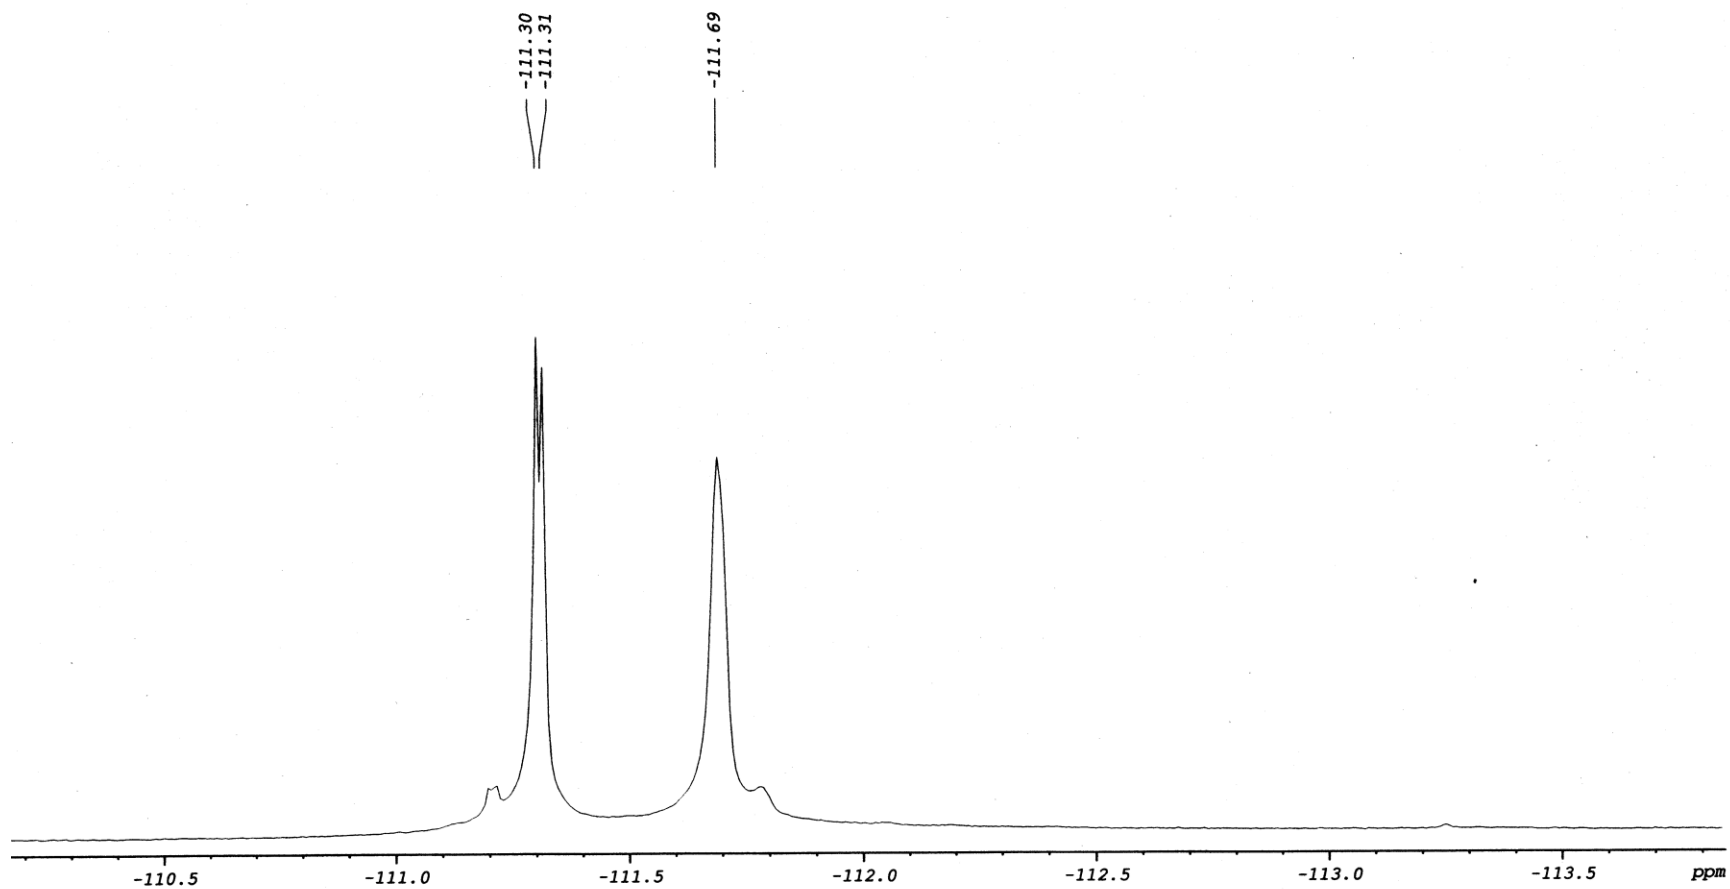

**Figure 5.**  $^{19}\text{F}$  NMR (470 MHz,  $\text{DMSO-}d_6$ ) spectra of compound **4b**

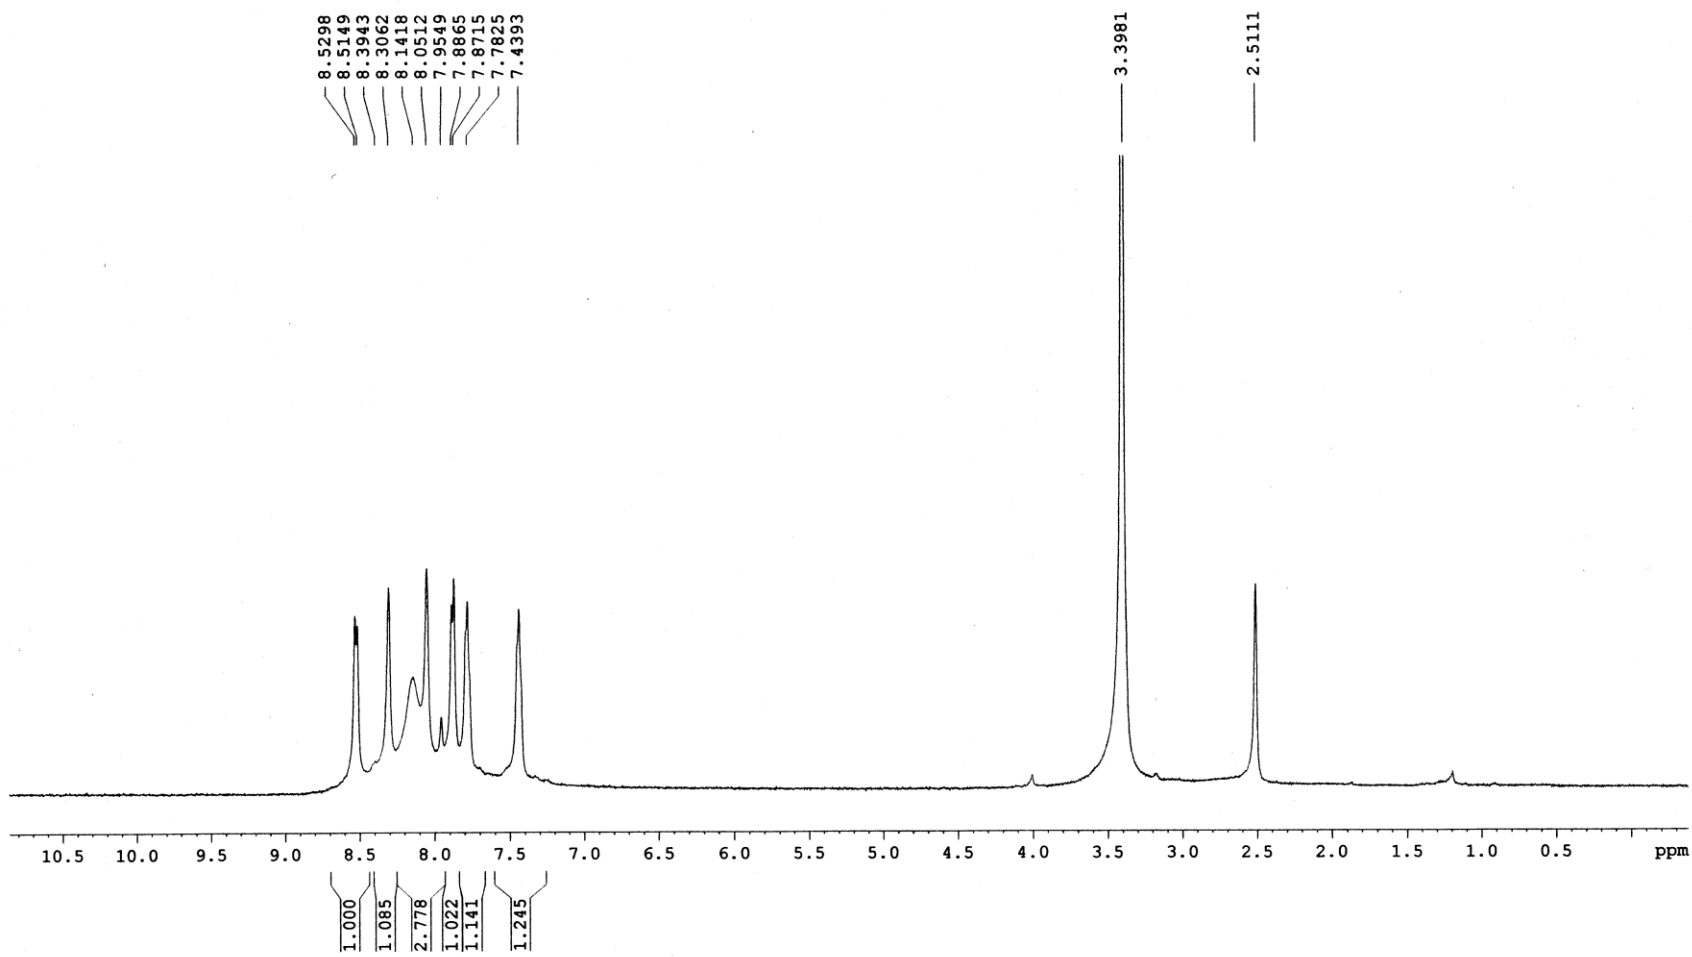

**Figure 6.**  $^1\text{H}$  NMR (500 MHz,  $\text{DMSO-}d_6$ ) spectra of compound **4c**

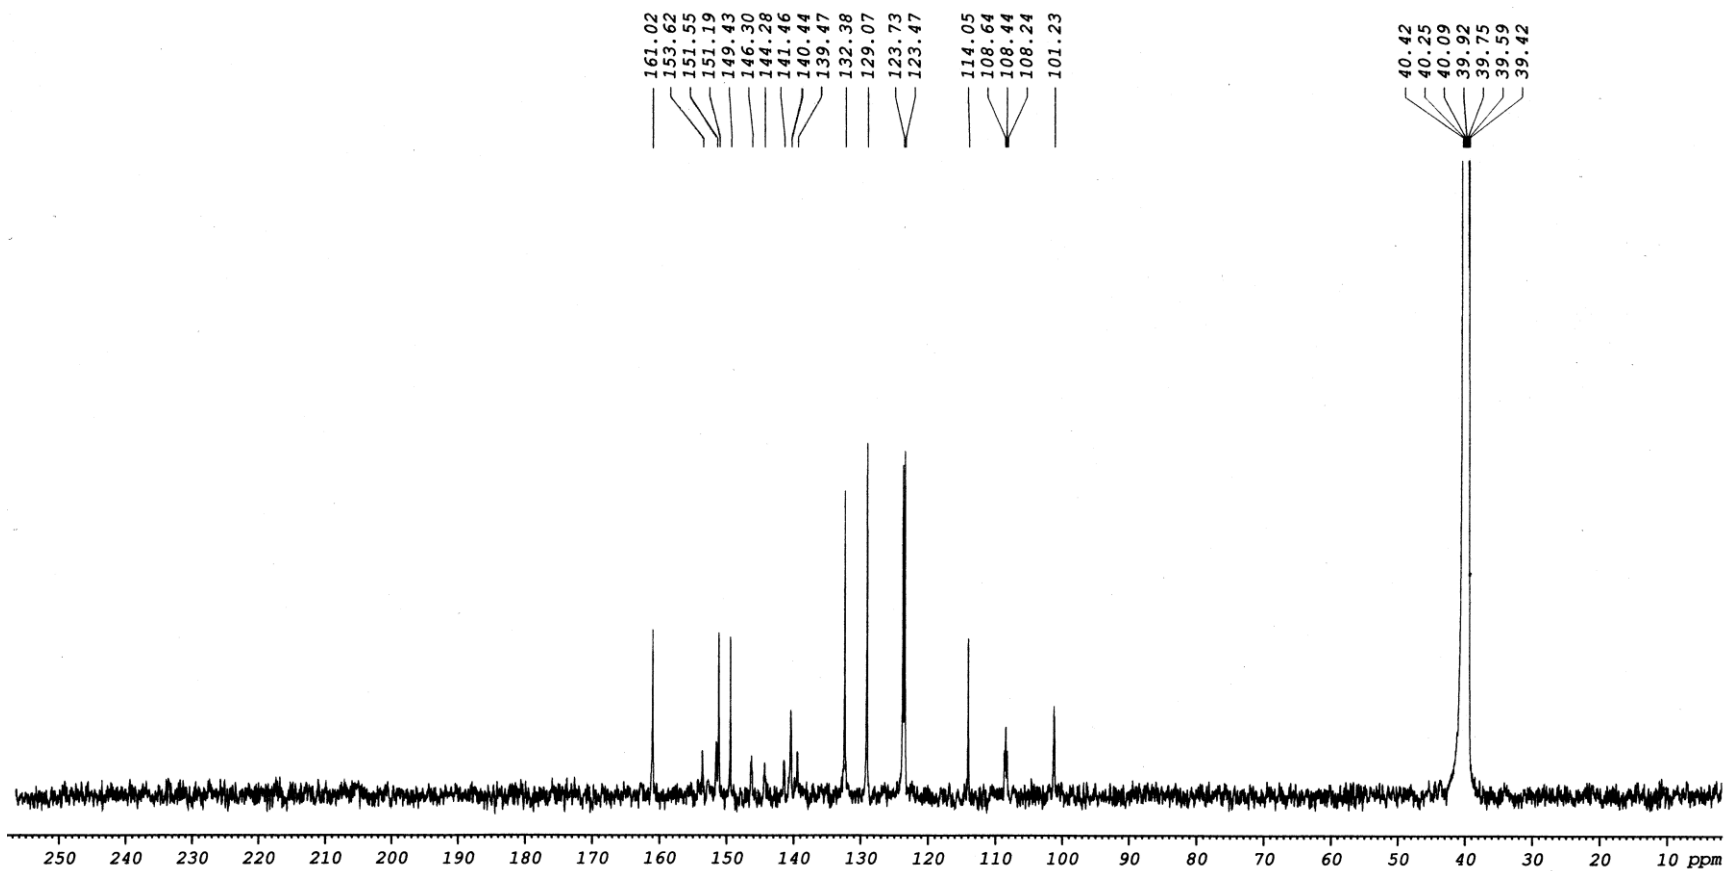

Figure 7.  $^{13}\text{C}$  NMR (125 MHz,  $\text{DMSO-}d_6$ ) spectra of compound **4c**

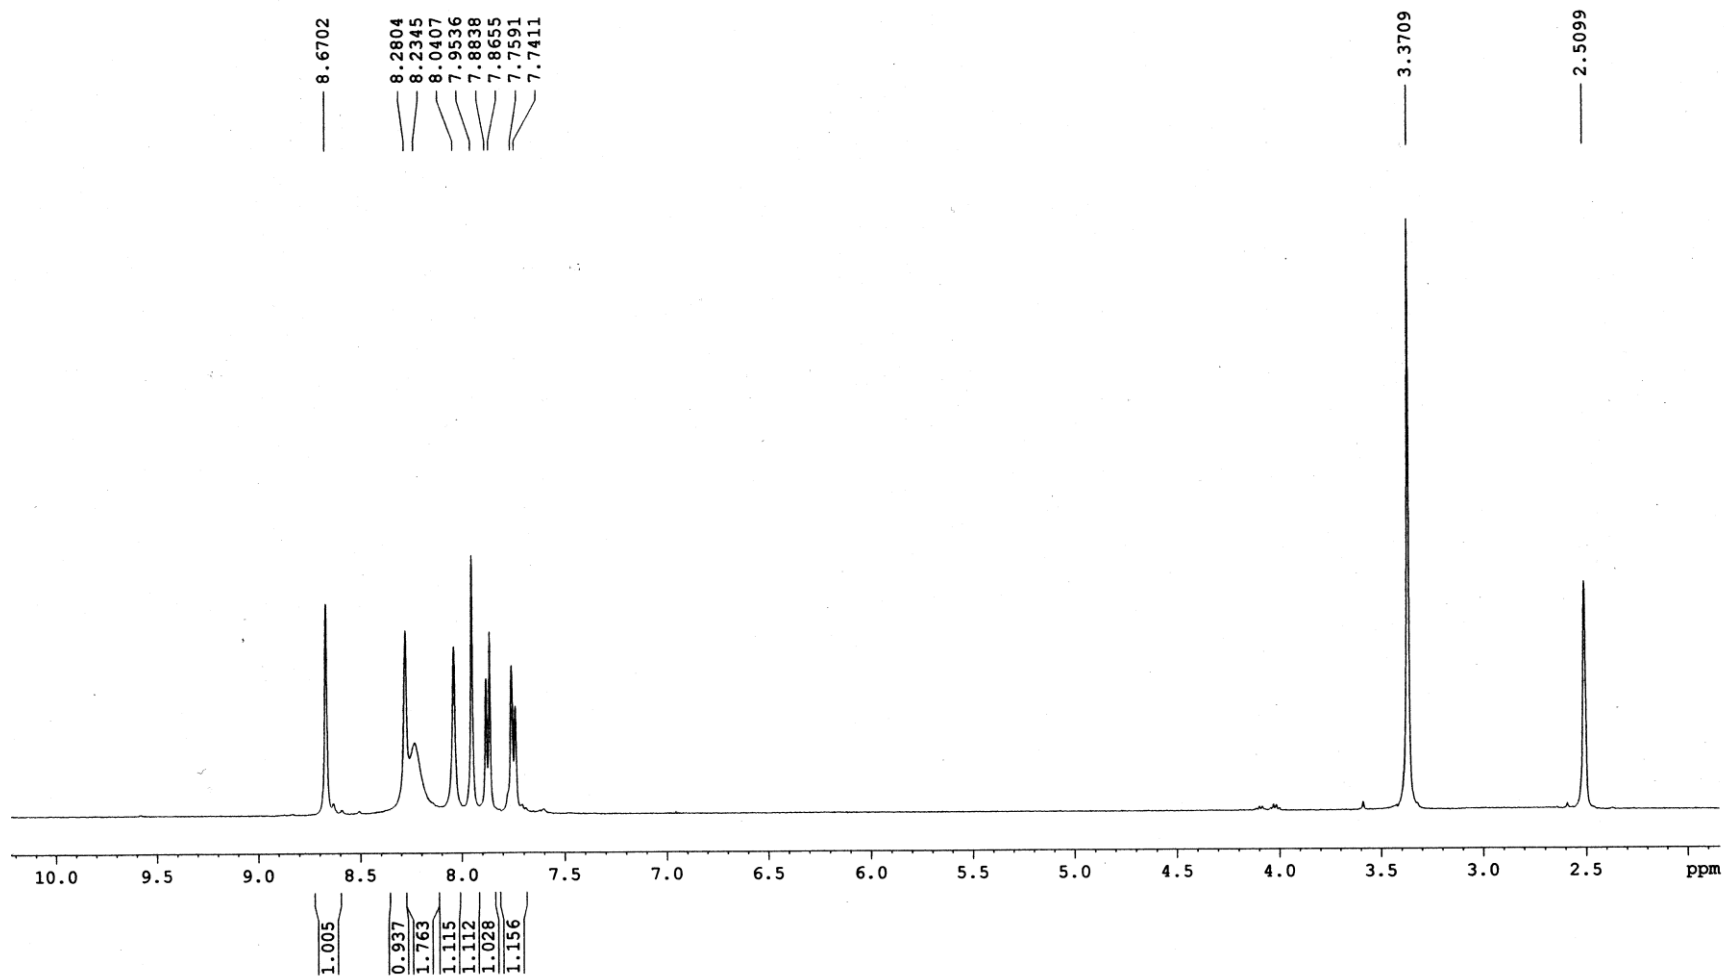

Figure 8.  $^1\text{H}$  NMR (500 MHz,  $\text{DMSO-}d_6$ ) spectra of compound 4e

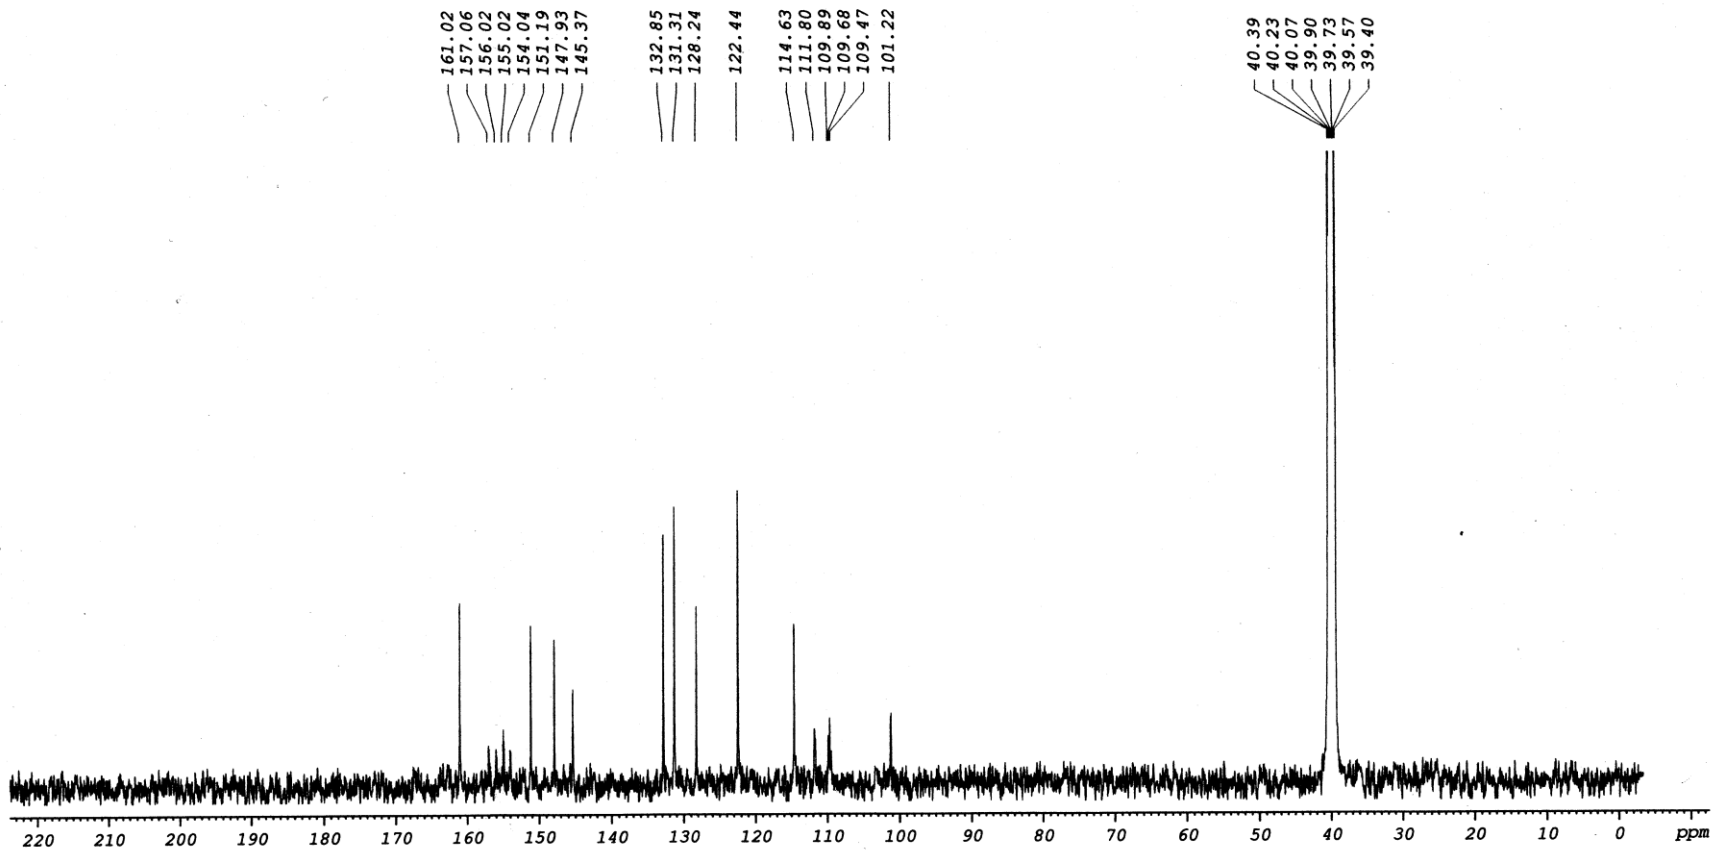

Figure 9.  $^{13}\text{C}$  NMR (125 MHz,  $\text{DMSO}-d_6$ ) spectra of compound 4e

YUNNAN UNIVER. AV. DRX500  
huangchao hc6g in DMSO

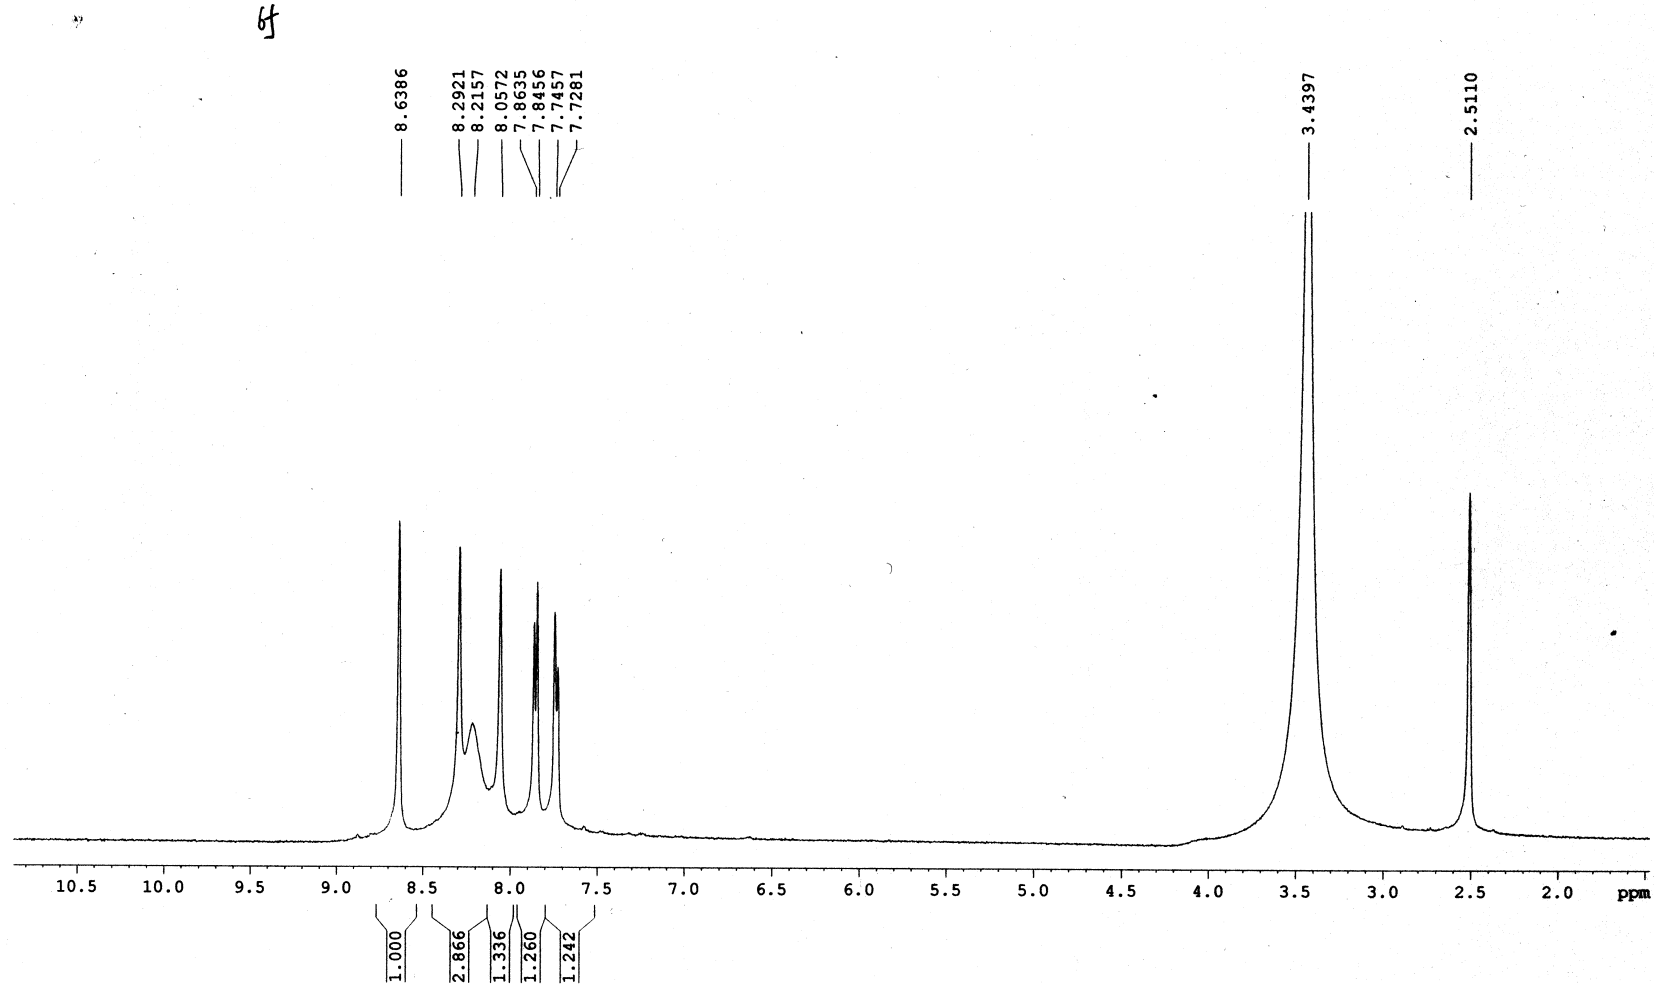

Figure 10.  $^1\text{H}$  NMR (500 MHz,  $\text{DMSO}-d_6$ ) spectra of compound **4f**



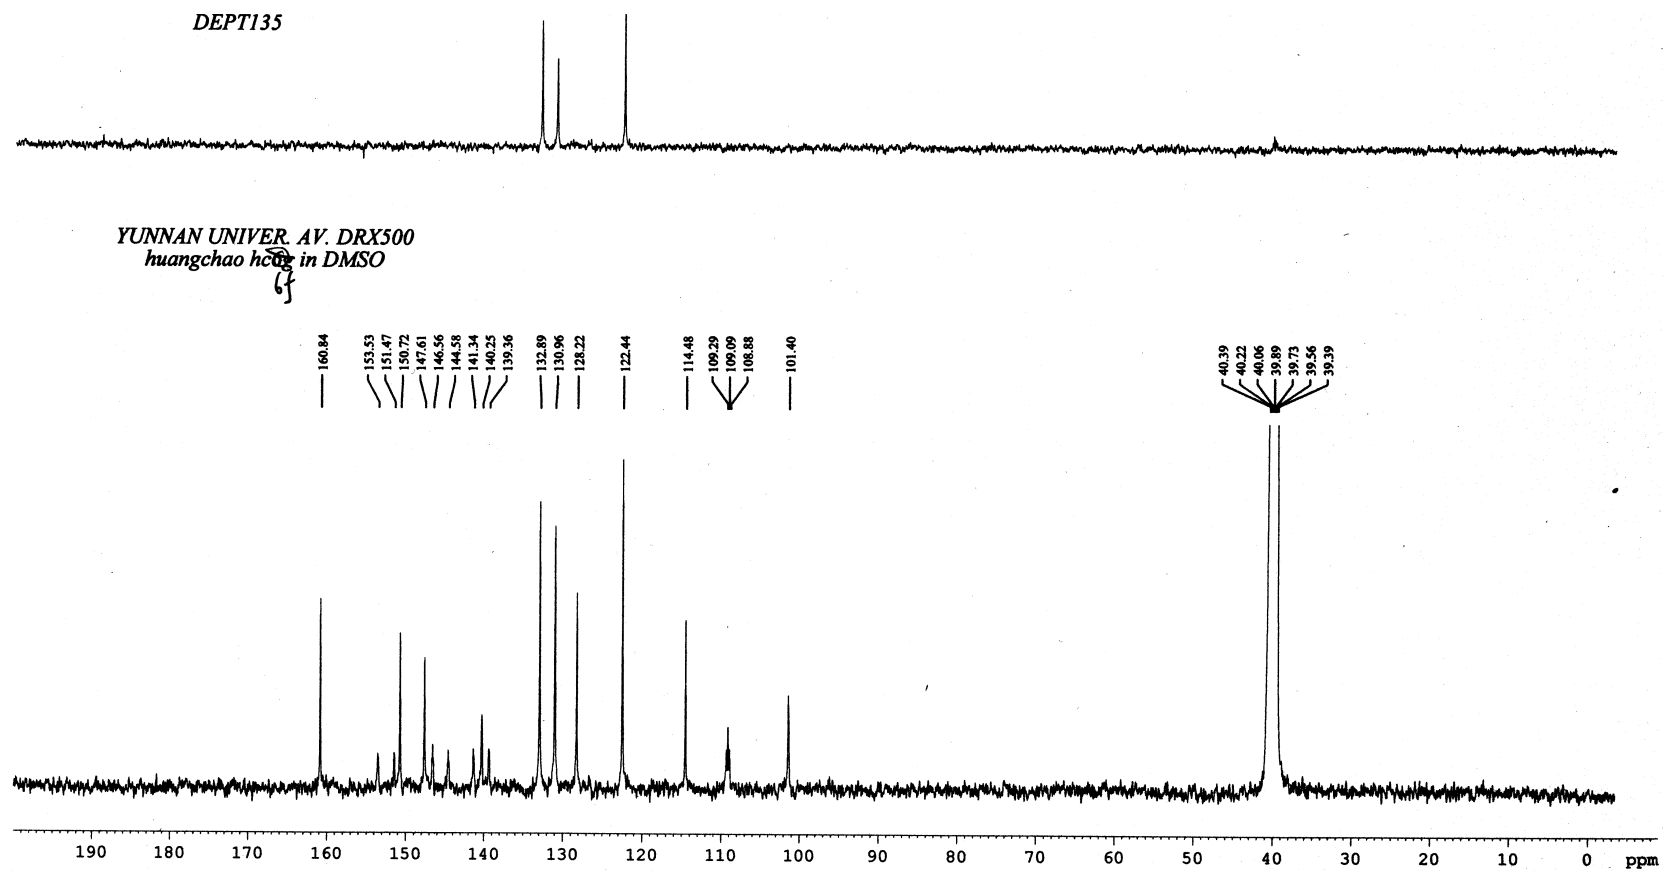

Figure 11.  $^{13}\text{C}$  NMR (125 MHz,  $\text{DMSO-}d_6$ ) spectra of compound 4f

YUNNAN UNIVER. AV. DRX500  
Huangchao hcs in DMSO  
19F decoupling 4f

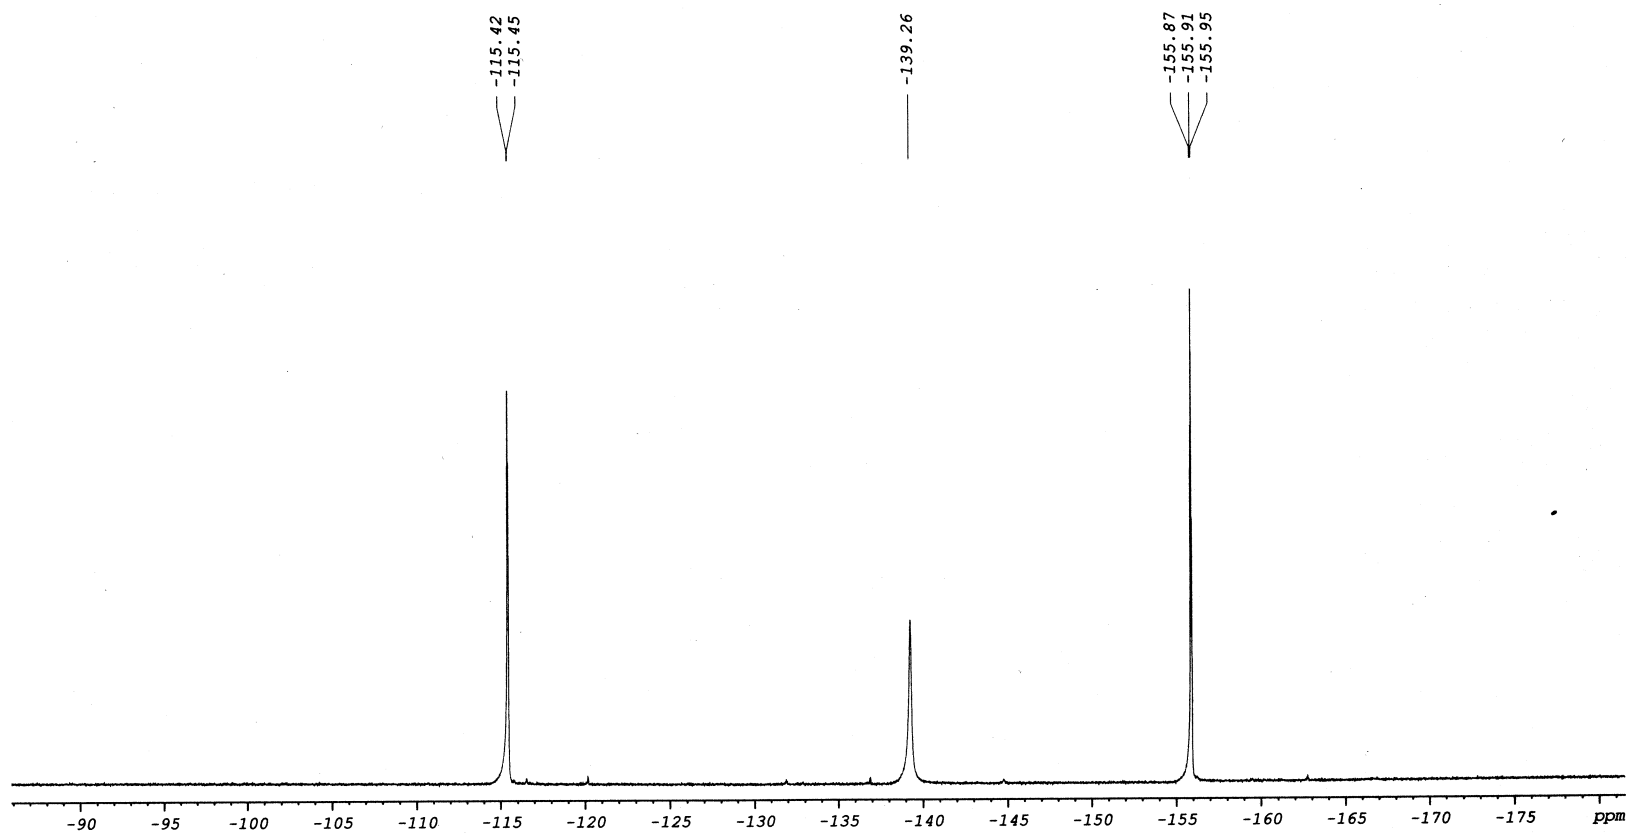

Figure 12.  $^{19}\text{F}$  NMR (470 MHz,  $\text{DMSO-}d_6$ ) spectra of compound 4f

YUNNAN UNIVER. AV. DRX500  
huangchao hch6g in DMF  
10121002

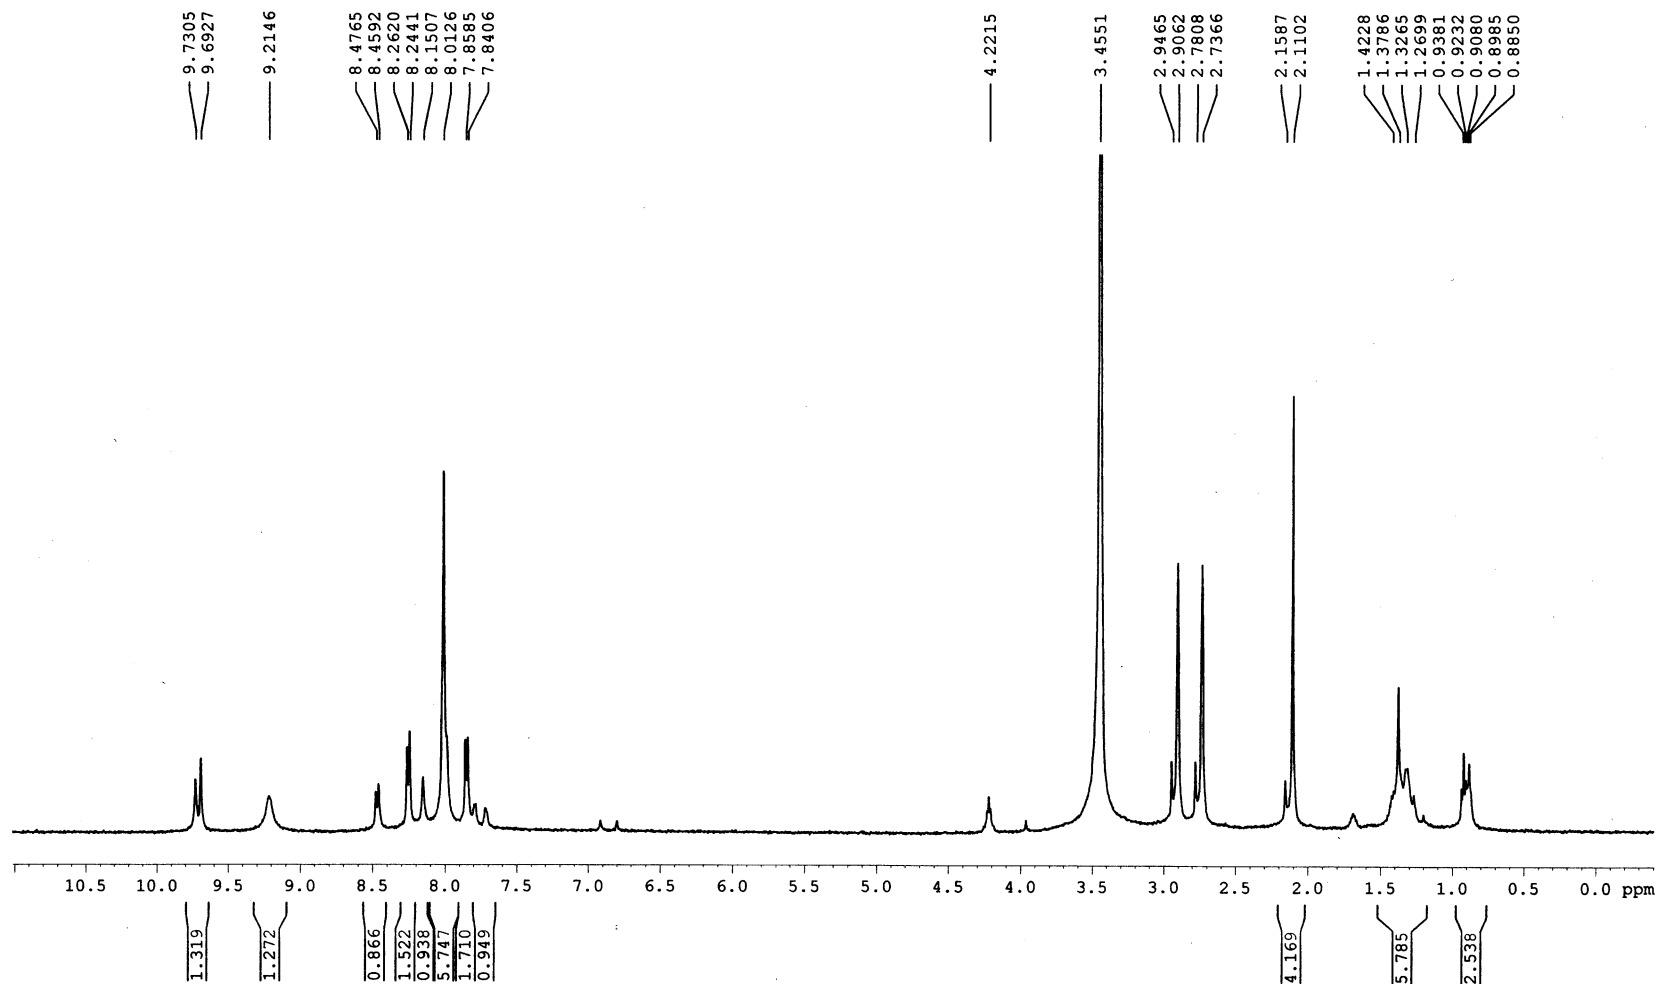

Figure 13.  $^1\text{H}$  NMR (500 MHz,  $\text{DMF-}d_6$ ) spectra of compound 4g

YUNNAN UNIVER. AV. DRX500  
huangchao h<sub>2</sub>c<sub>2</sub> in DMSO

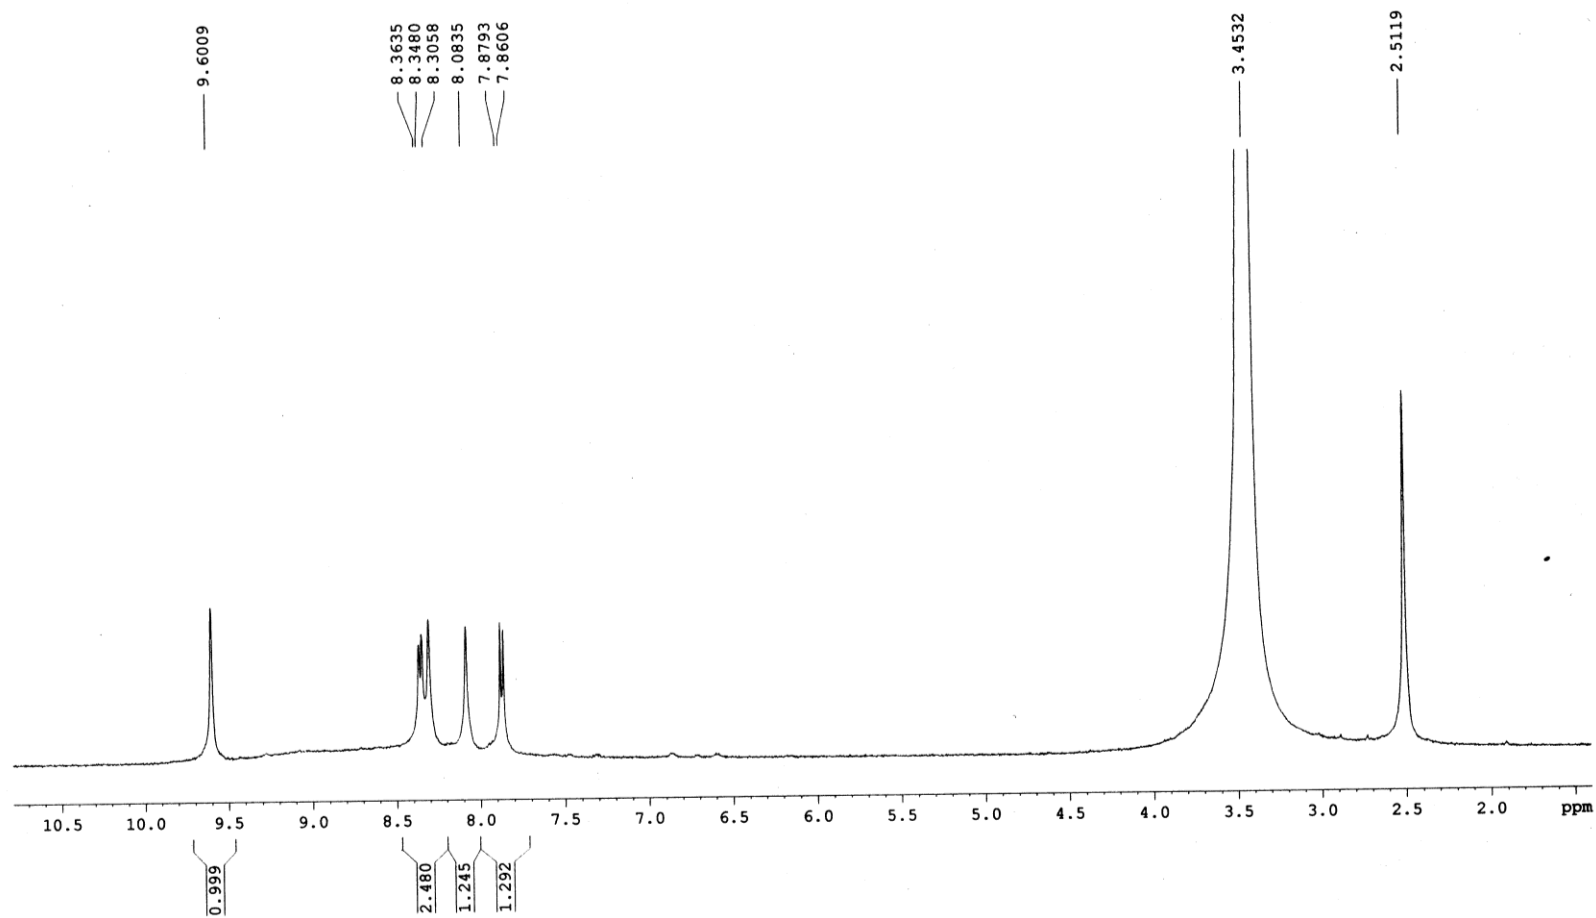

Figure 14. <sup>1</sup>H NMR (500 MHz, DMSO-*d*<sub>6</sub>) spectra of compound 4h

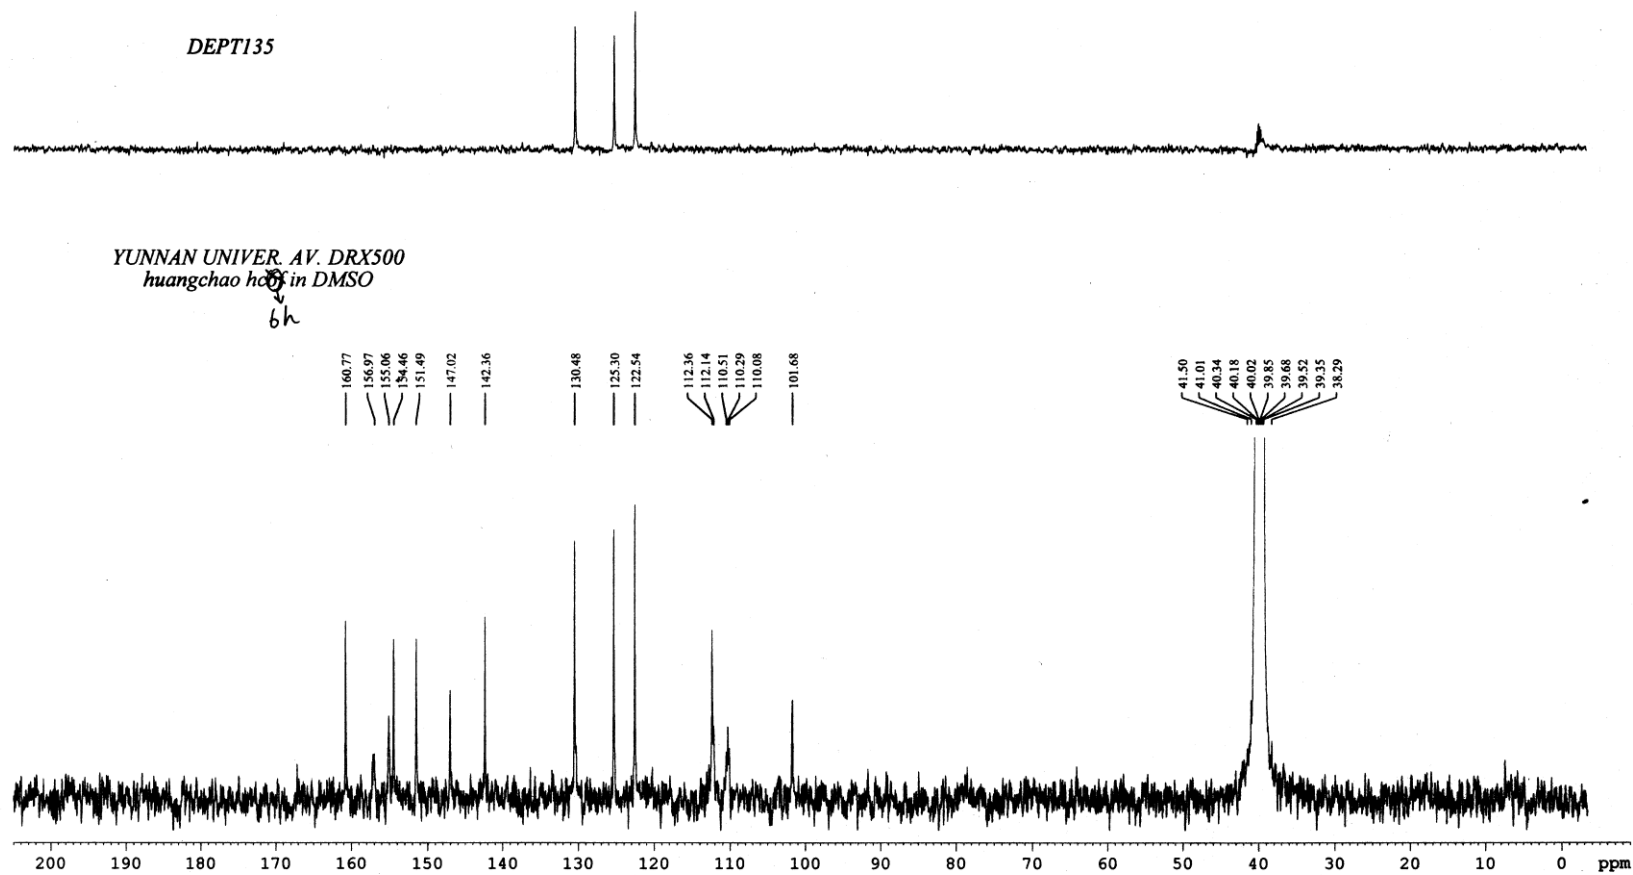

Figure 15.  $^{13}\text{C}$  NMR (125 MHz,  $\text{DMSO-}d_6$ ) spectra of compound 4h

YUNNAN UNIVER. AV. DRX500  
huangchao hc6i in DMF  
11011803

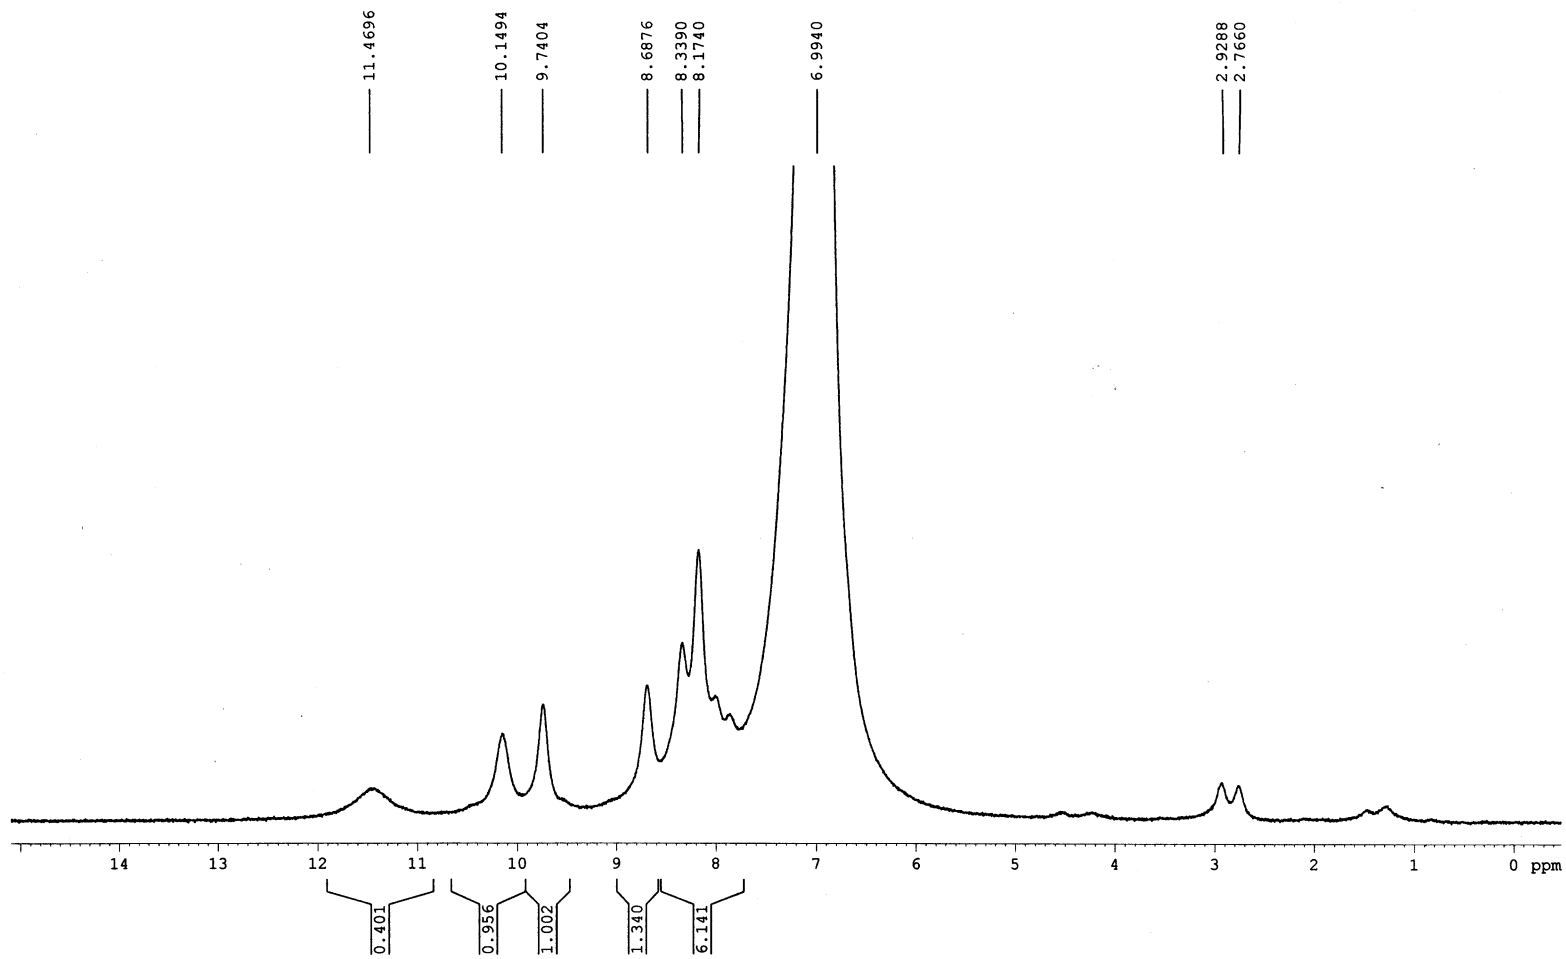

Figure 16.  $^1\text{H}$  NMR (500 MHz,  $\text{DMF-}d_6$ ) spectra of compound **4i**

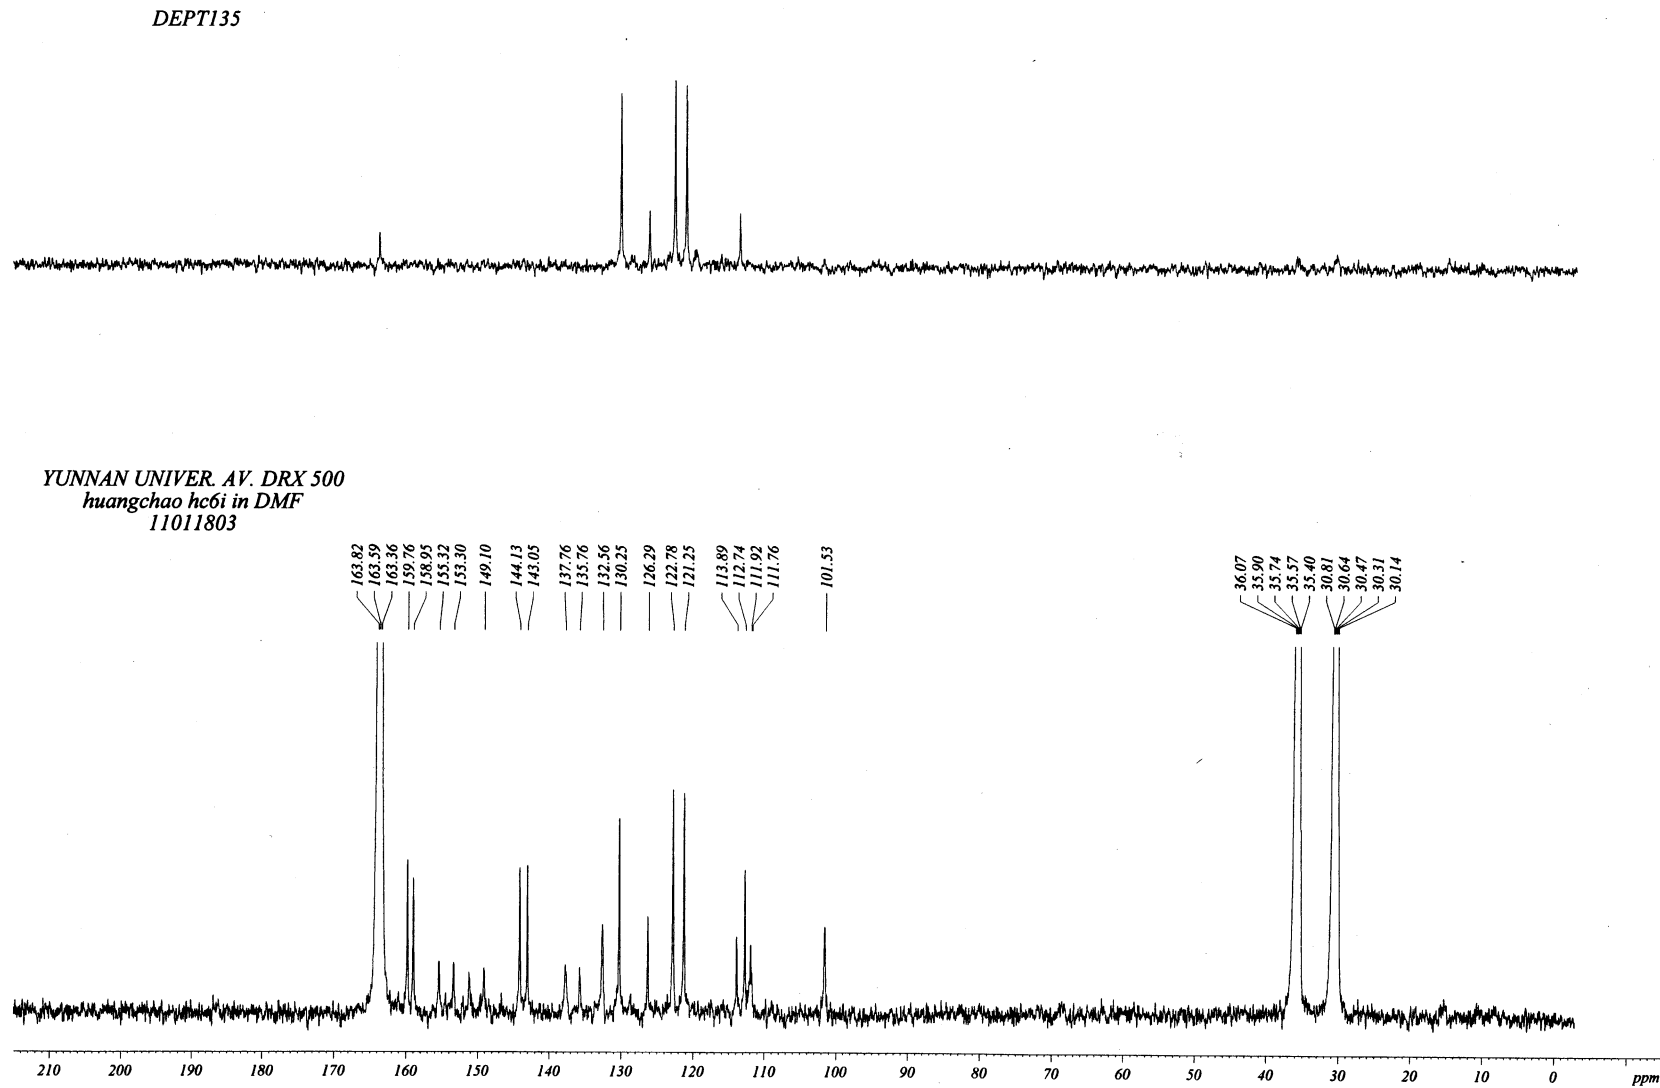

Figure 17.  $^{13}\text{C}$  NMR (125 MHz,  $\text{DMF-d}_6$ ) spectra of compound **4i**

YUNNAN UNIVER. AV. DRX500  
huangchao hc6i in DMF  
19F decoupling 11011803

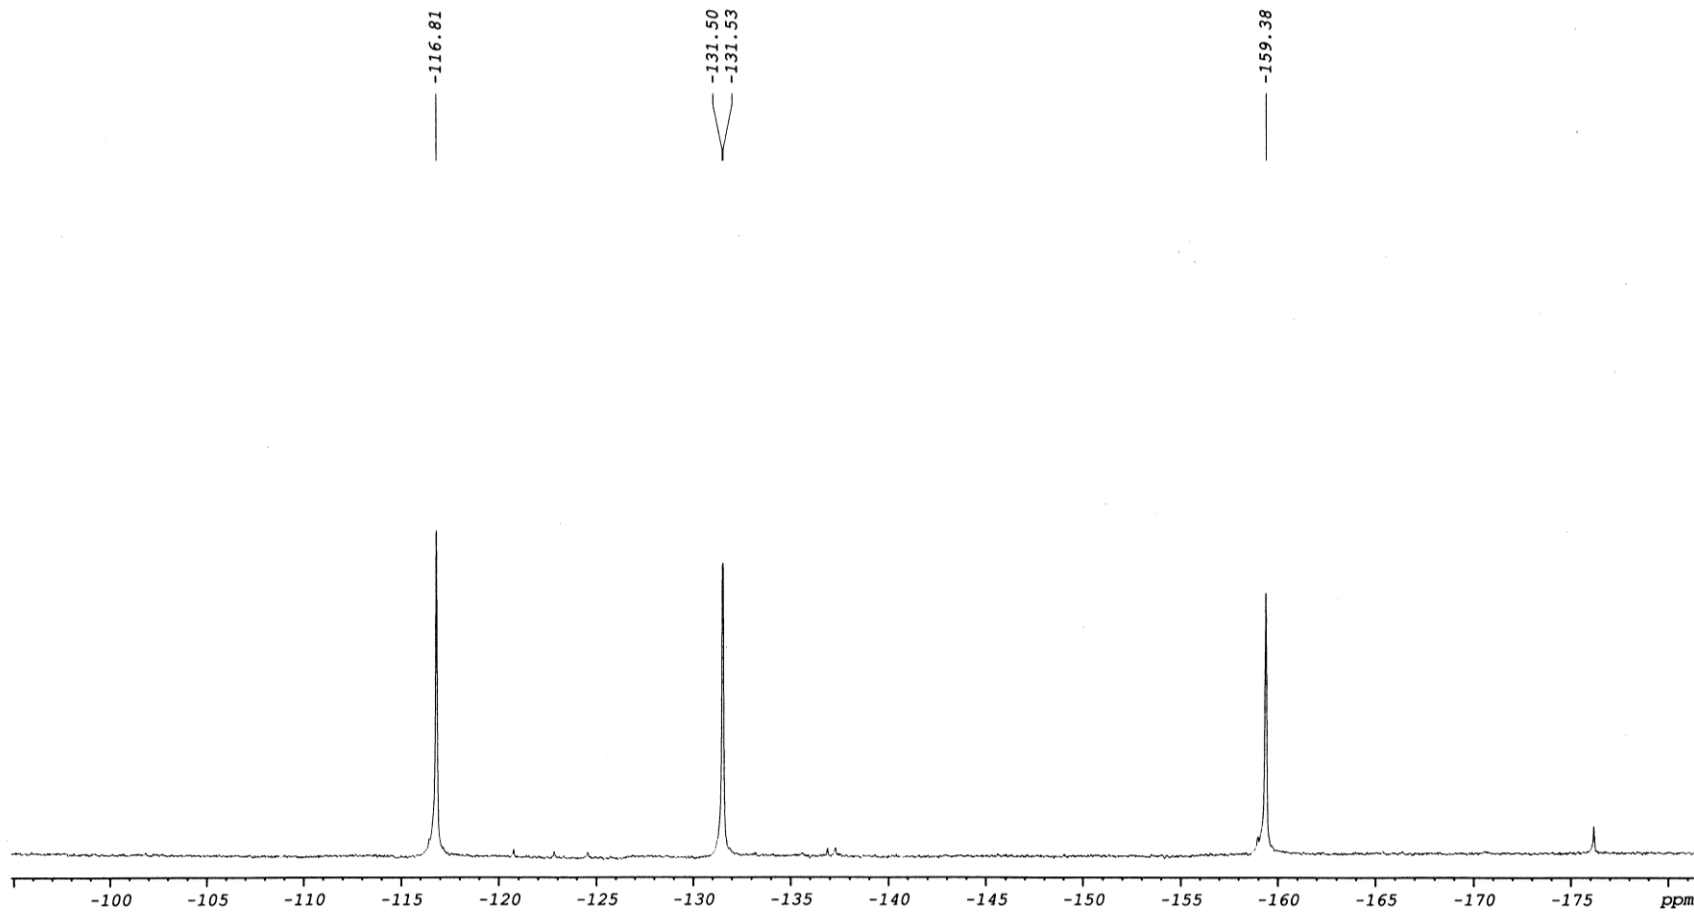

Figure 18.  $^{19}\text{F}$  NMR (470 MHz,  $\text{DMF-d}_6$ ) spectra of compound **4i**



YUNNAN UNIVER. AV. DRX500  
huangchao hc6j in DMSO  
10111601

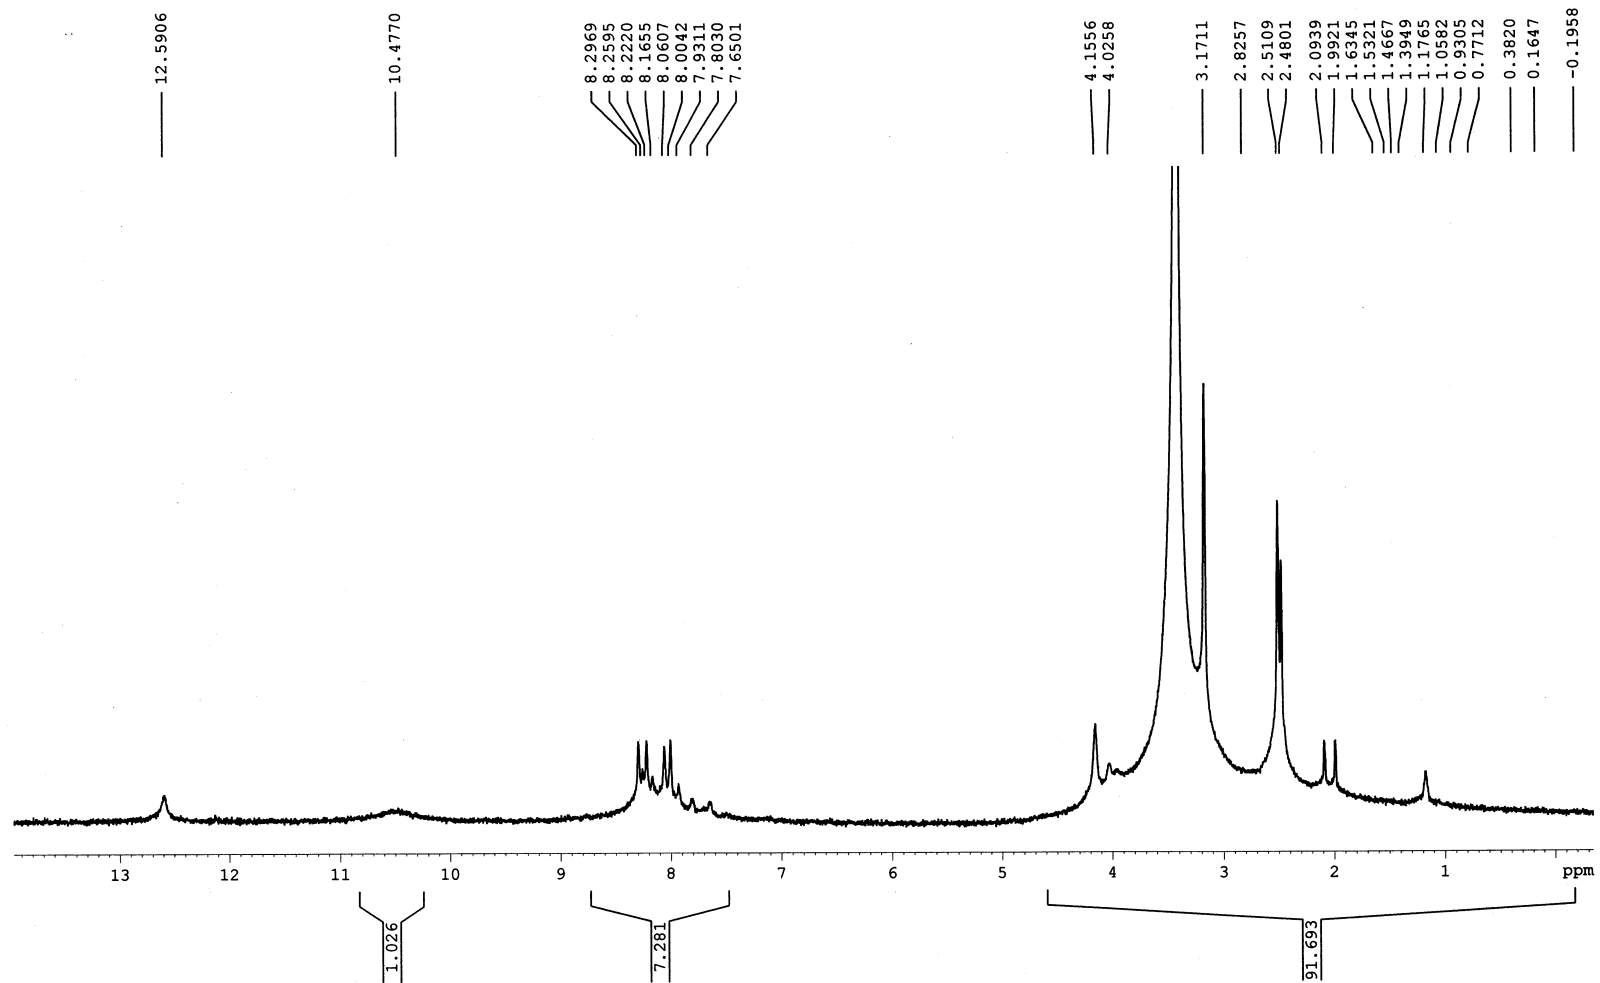

Figure 19.  $^1\text{H}$  NMR (500 MHz,  $\text{DMSO-}d_6$ ) spectra of compound **4j**

YUNNAN UNIVER. AV. DRX500 ?  
huangchao hch6k in DMF  
10112904

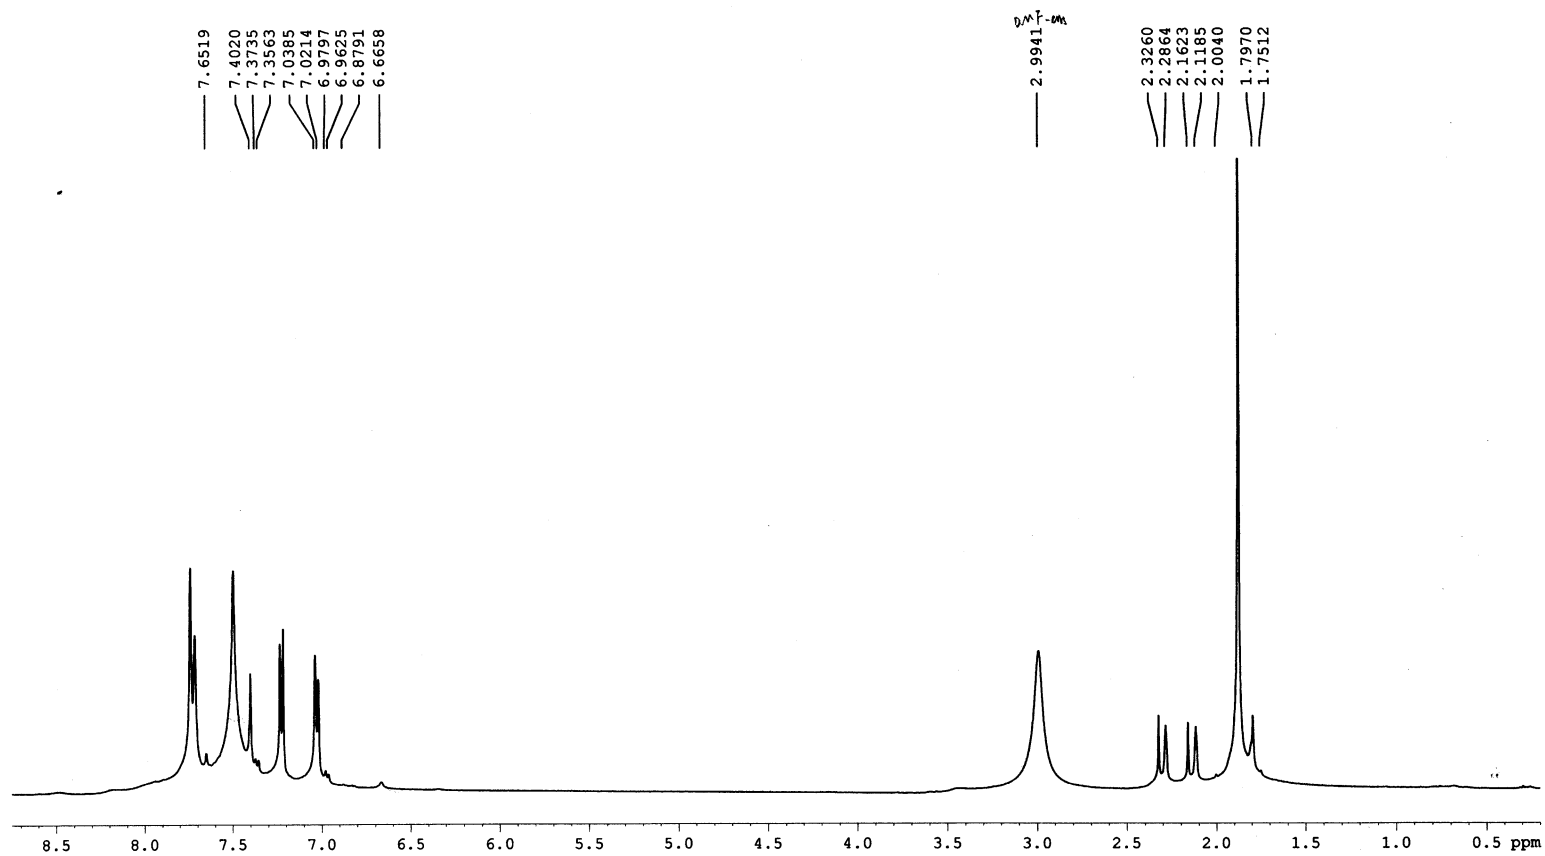

Figure 20.  $^1\text{H}$  NMR (500 MHz, DMF- $d_6$ ) spectra of compound 4k

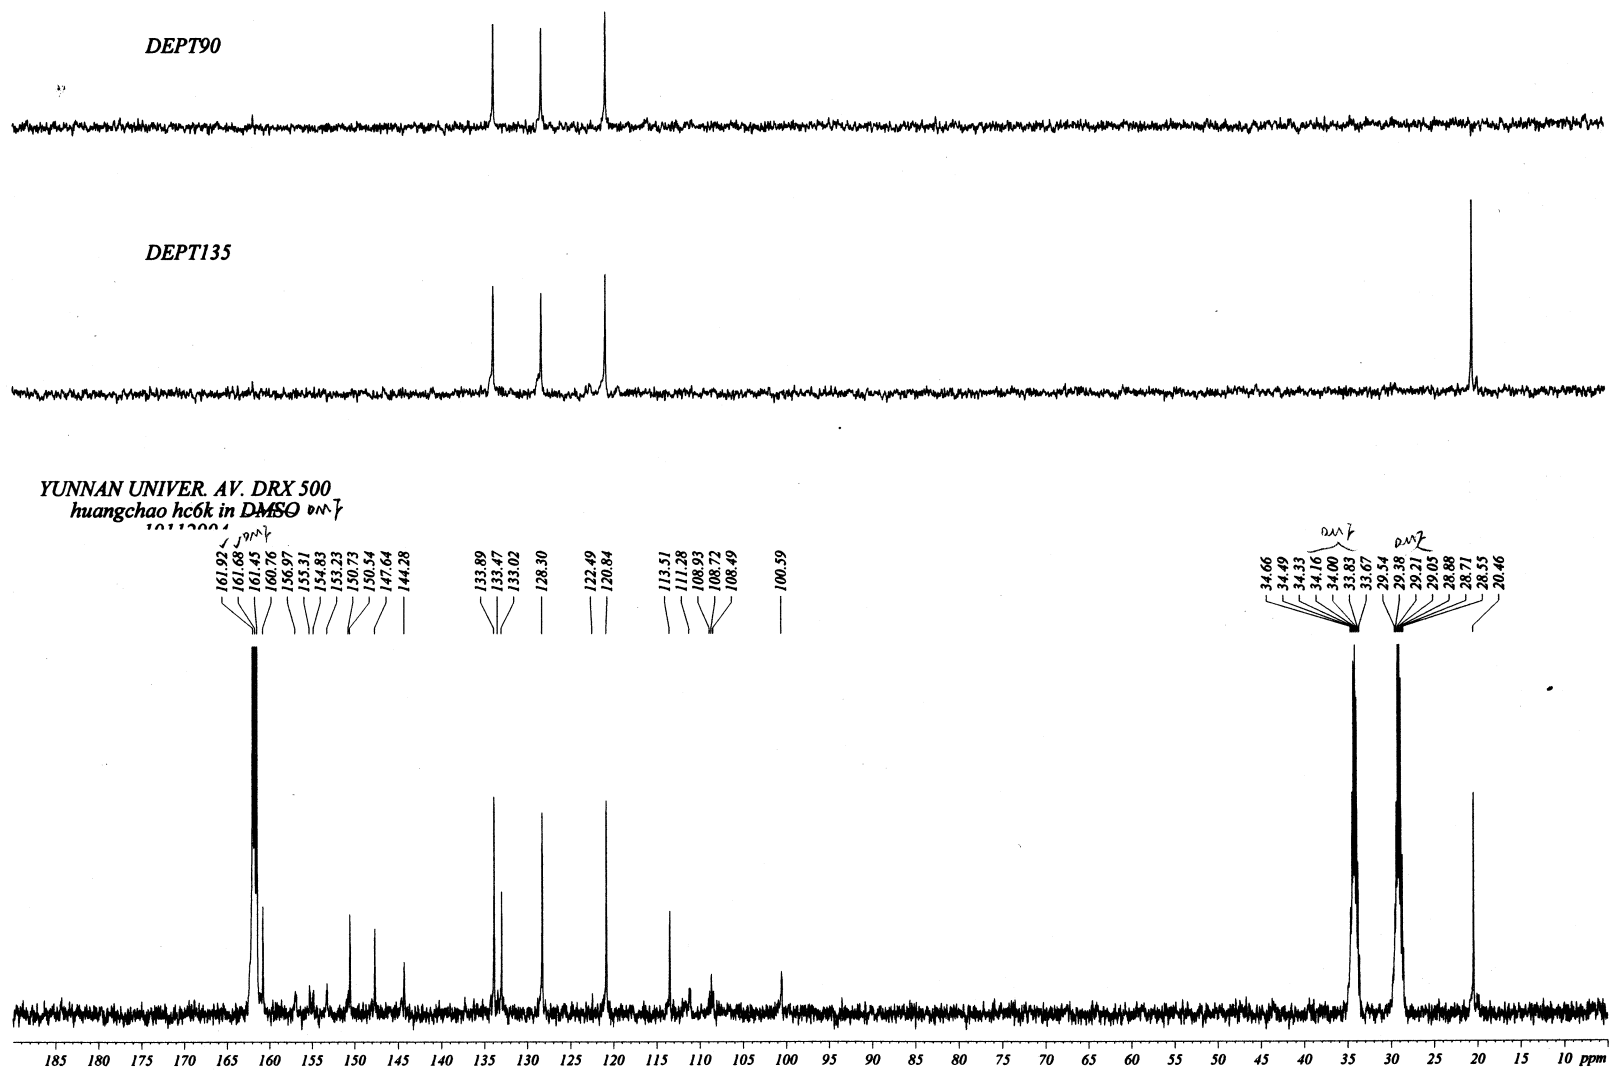

Figure 21.  $^{13}\text{C}$  NMR (125 MHz,  $\text{DMF}-d_6$ ) spectra of compound 4k

YUNNAN UNIVER. AV. DRX500  
huangchao hc6k in DMF  
19F decoupling

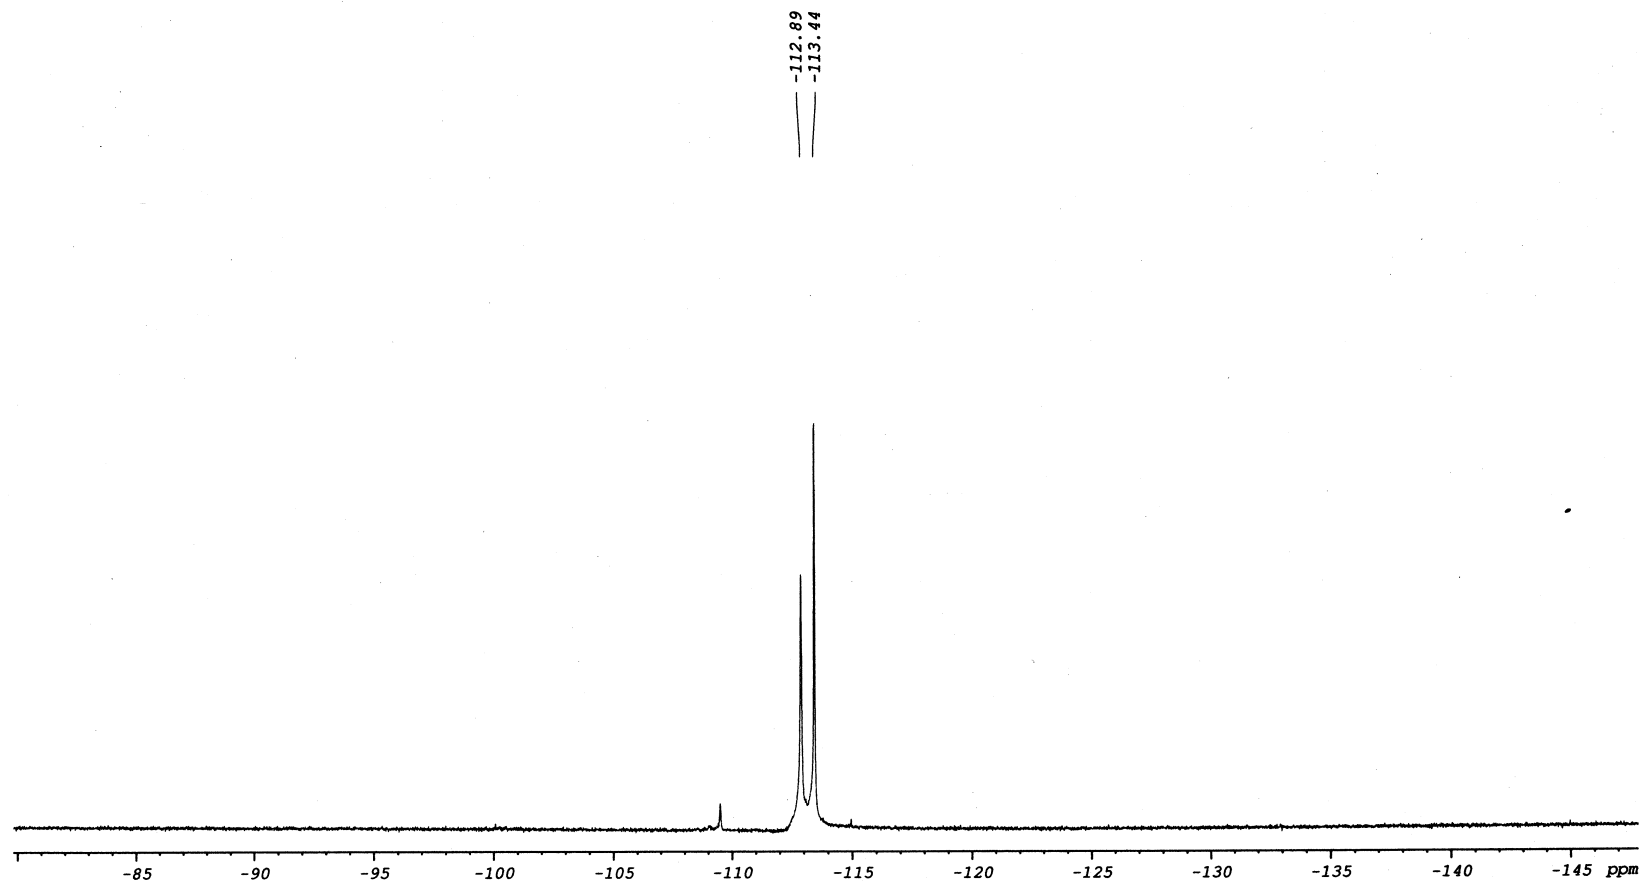

Figure 22.  $^{19}\text{F}$  NMR (470 MHz,  $\text{DMF-}d_6$ ) spectra of compound 4k

YUNNAN UNIVER. AV. DRX500  
huangchao hch61 in DMF  
10121001

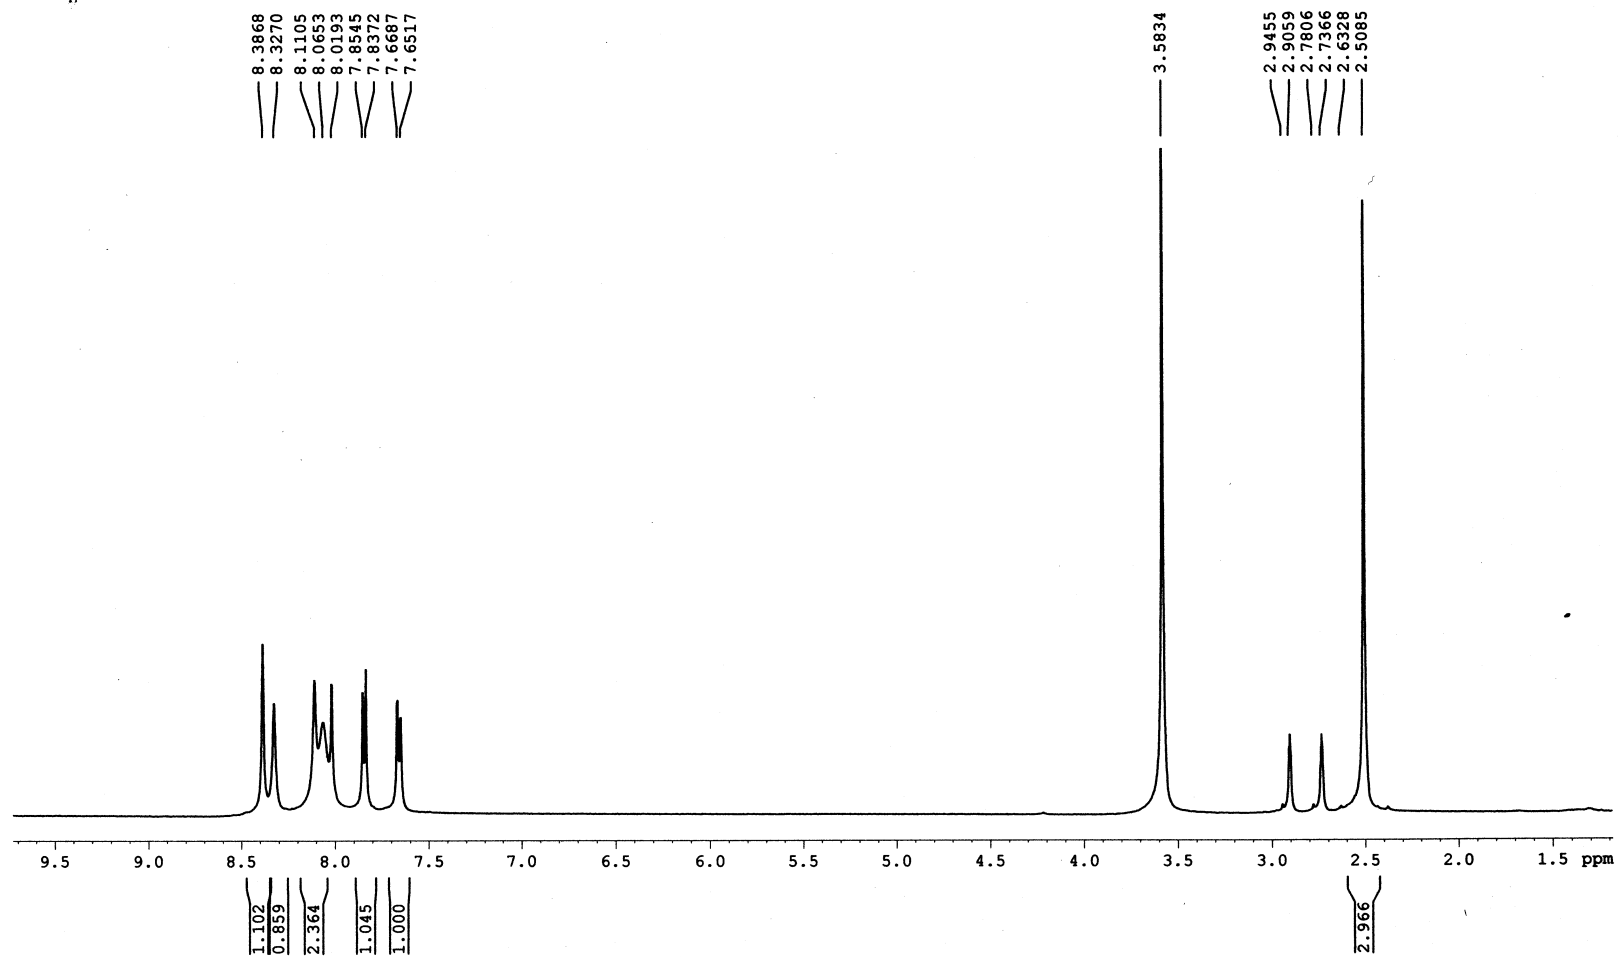

Figure 23.  $^1\text{H}$  NMR (500 MHz,  $\text{DMF-}d_6$ ) spectra of compound 4l

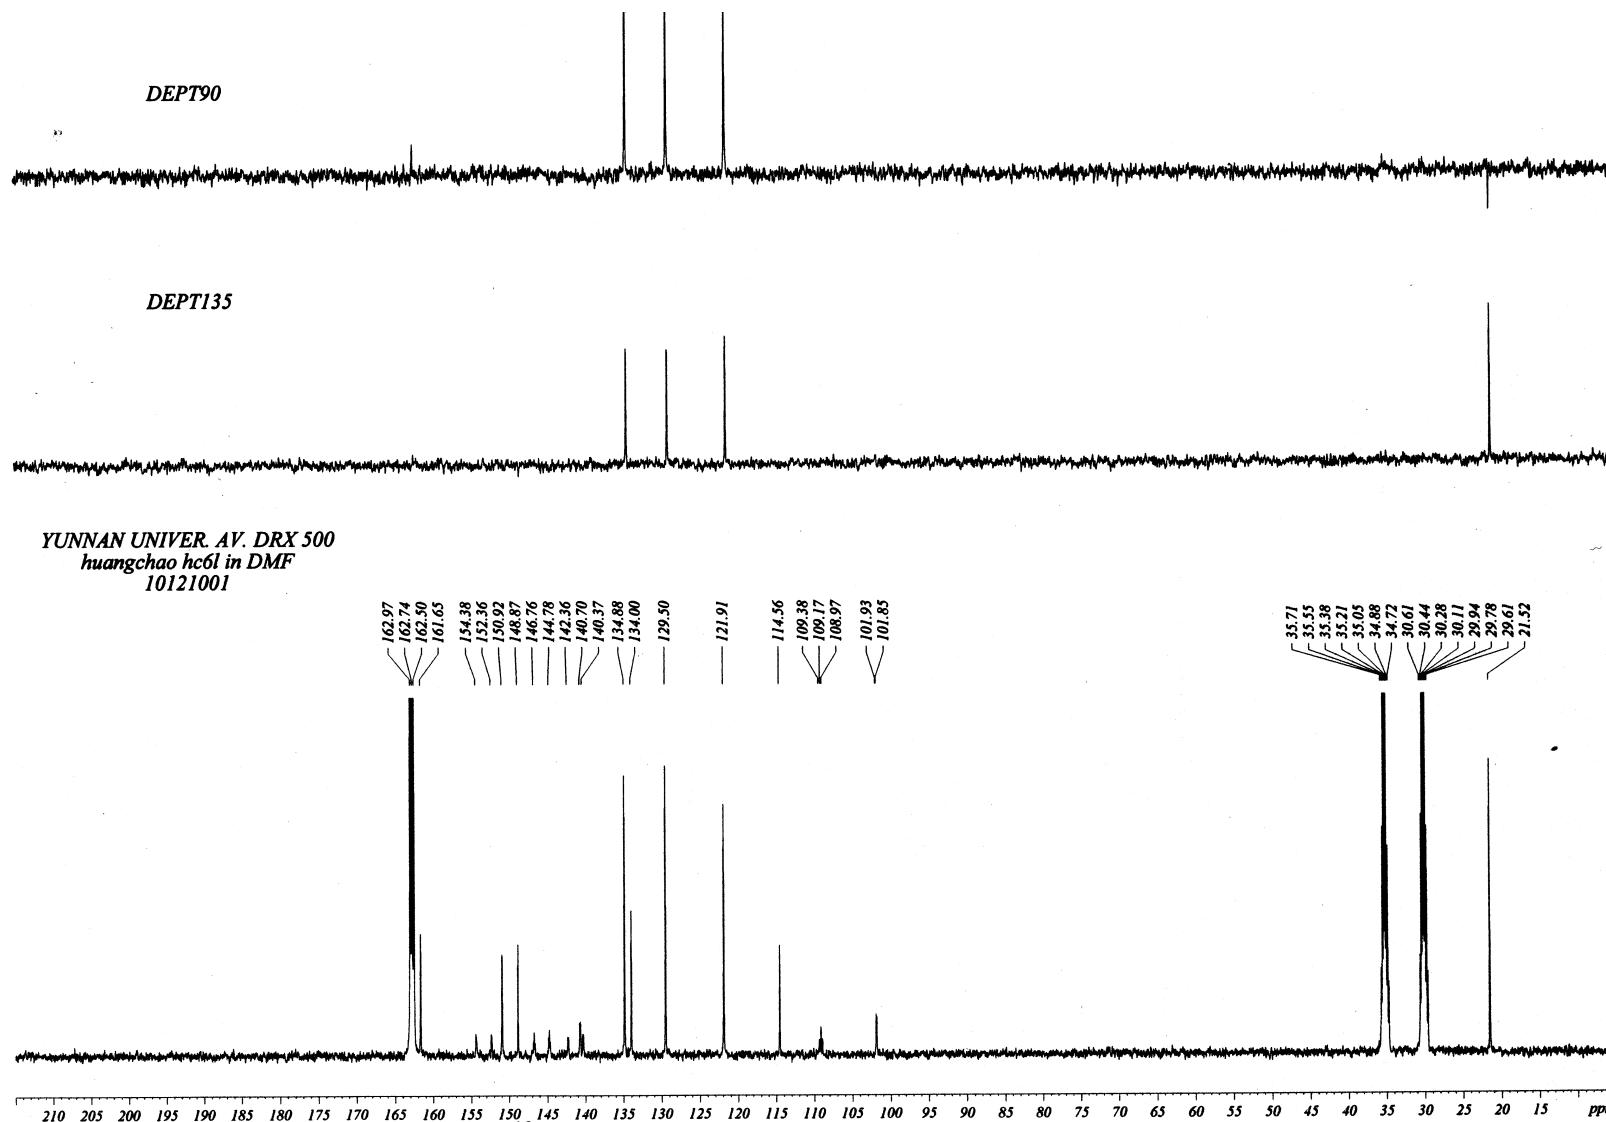

Figure 24.  $^{13}\text{C}$  NMR (125 MHz,  $\text{DMF-d}_6$ ) spectra of compound **4I**

YUNNAN UNIVER. AV. DRX500  
huangchao hc61 in DMF  
 $^{19}\text{F}$  decoupling

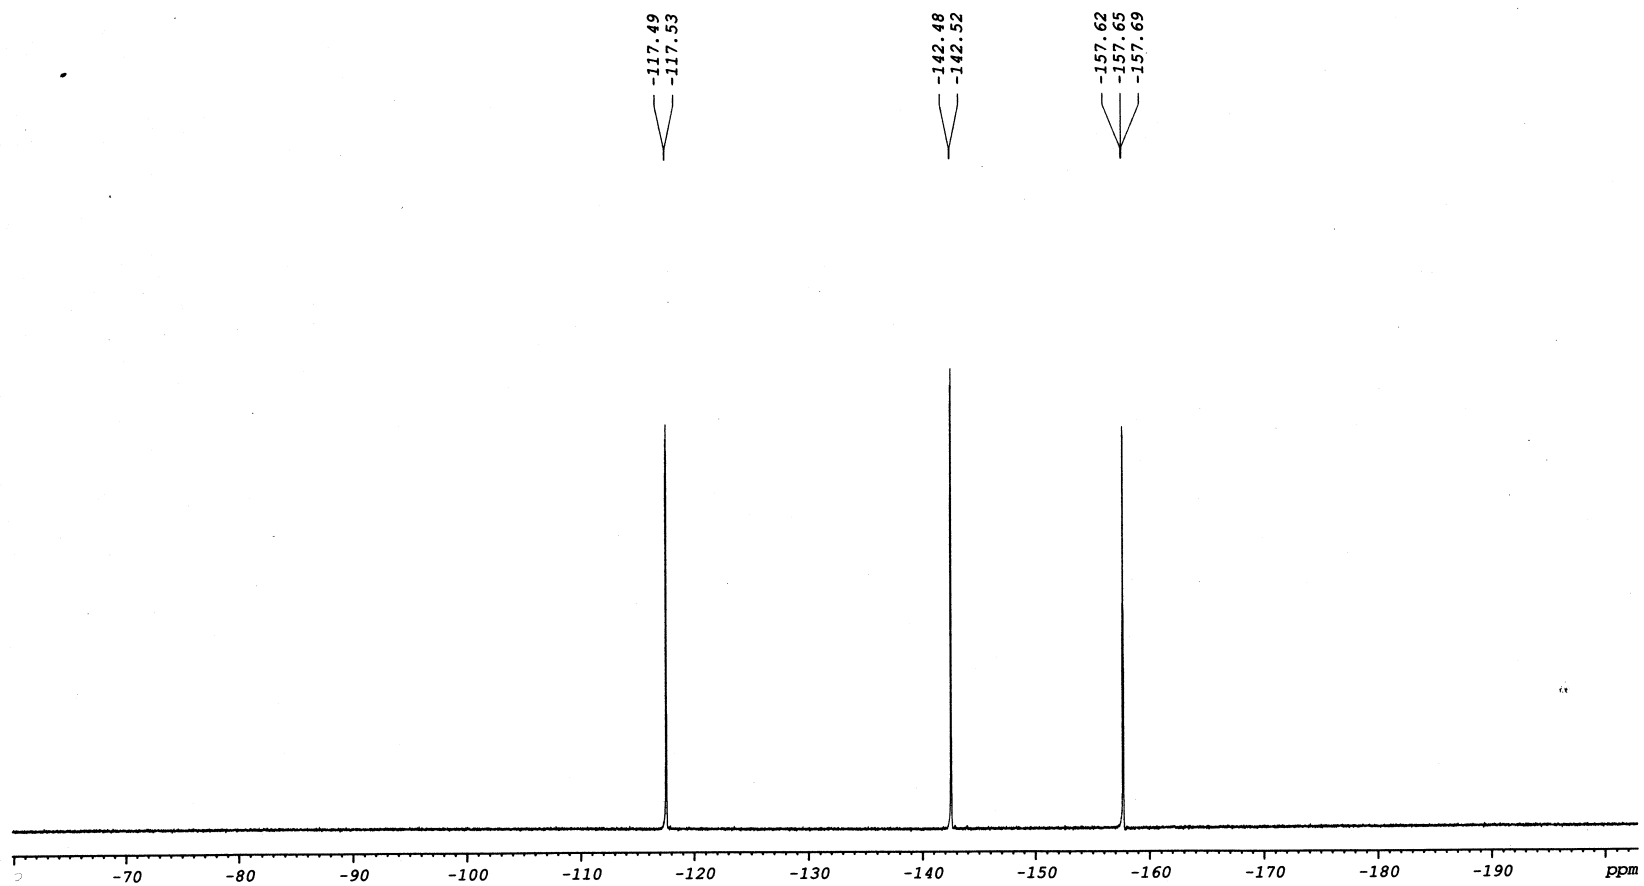

Figure 25.  $^{19}\text{F}$  NMR (470 MHz,  $\text{DMF-}d_6$ ) spectra of compound **41**

YUNNAN UNIVER. AV. DRX500  
huangchao hc6m in DMF  
11011804

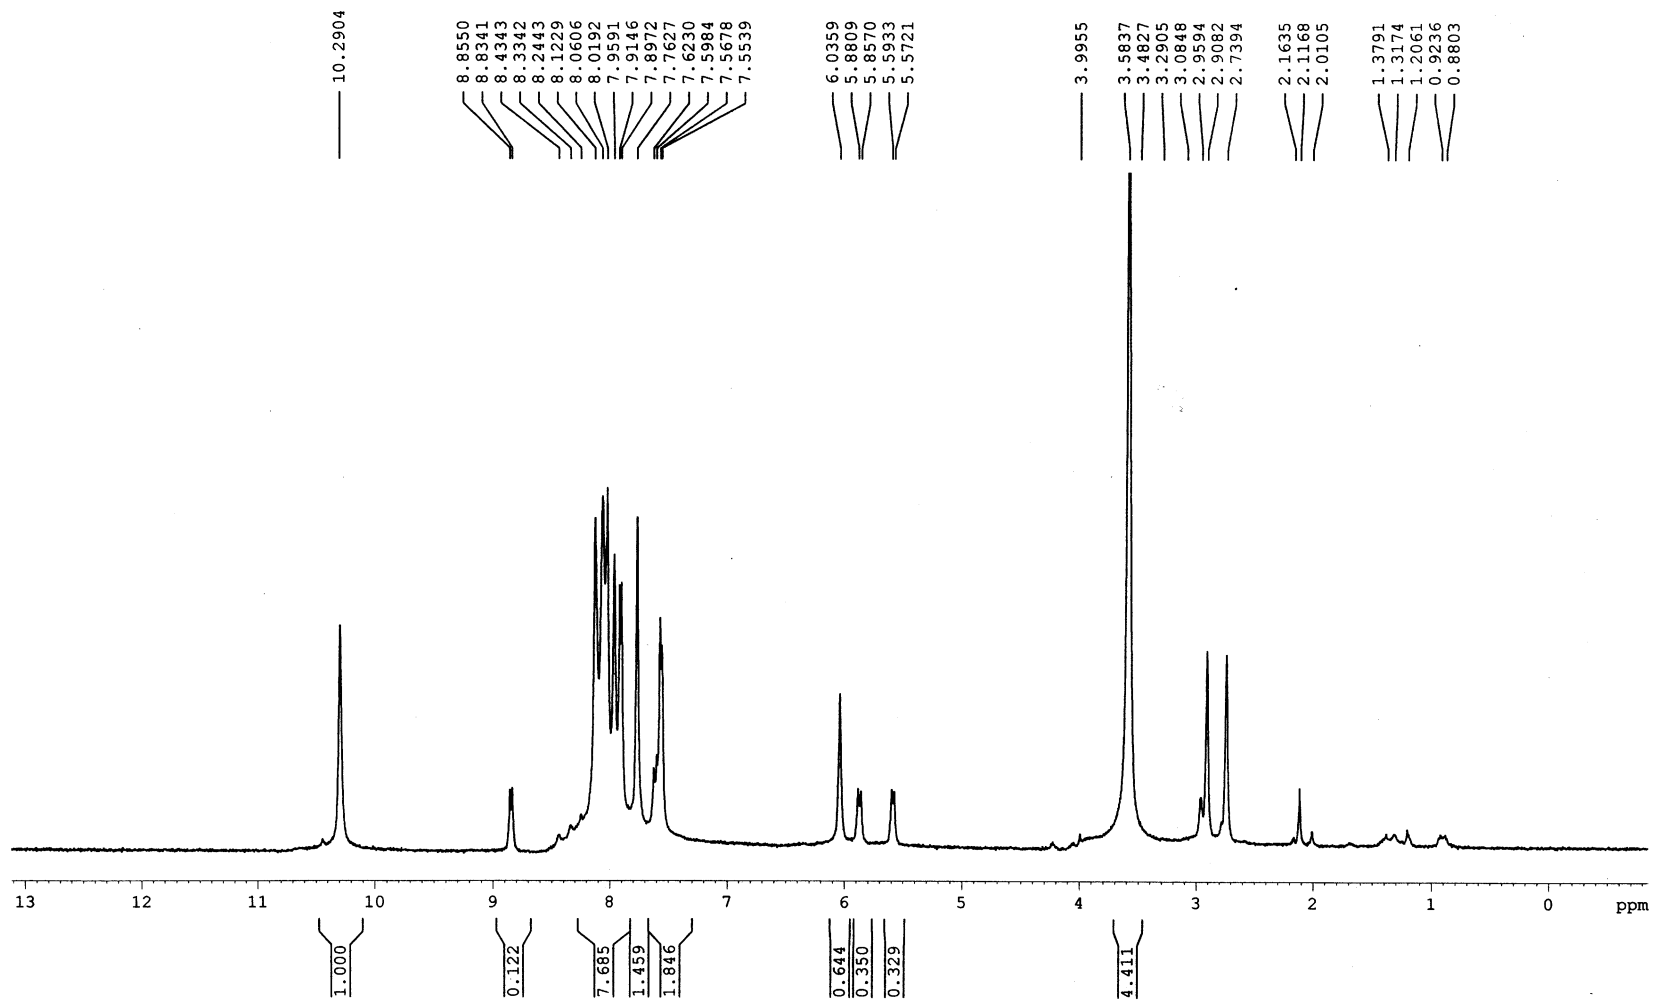

Figure 26.  $^1\text{H}$  NMR (500 MHz,  $\text{DMF-d}_6$ ) spectra of compound **4m**



DEPT135

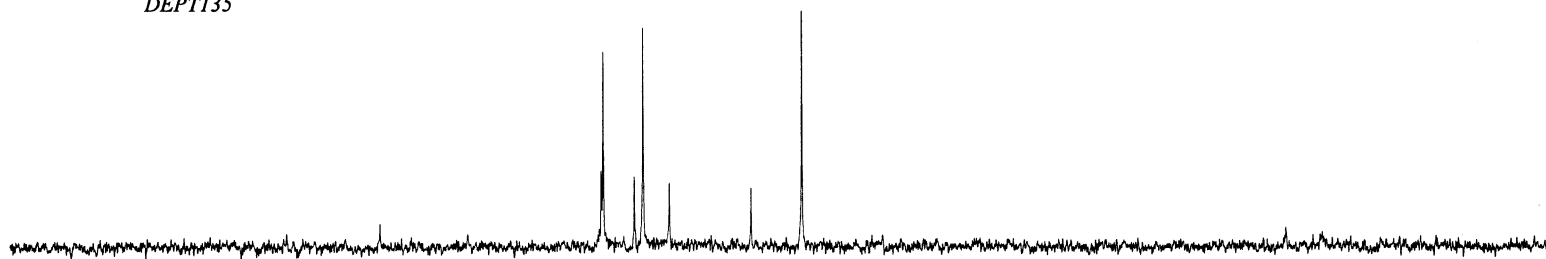

YUNNAN UNIVER. AV. DRX 500  
huangchao hc6m in DMF  
11011804

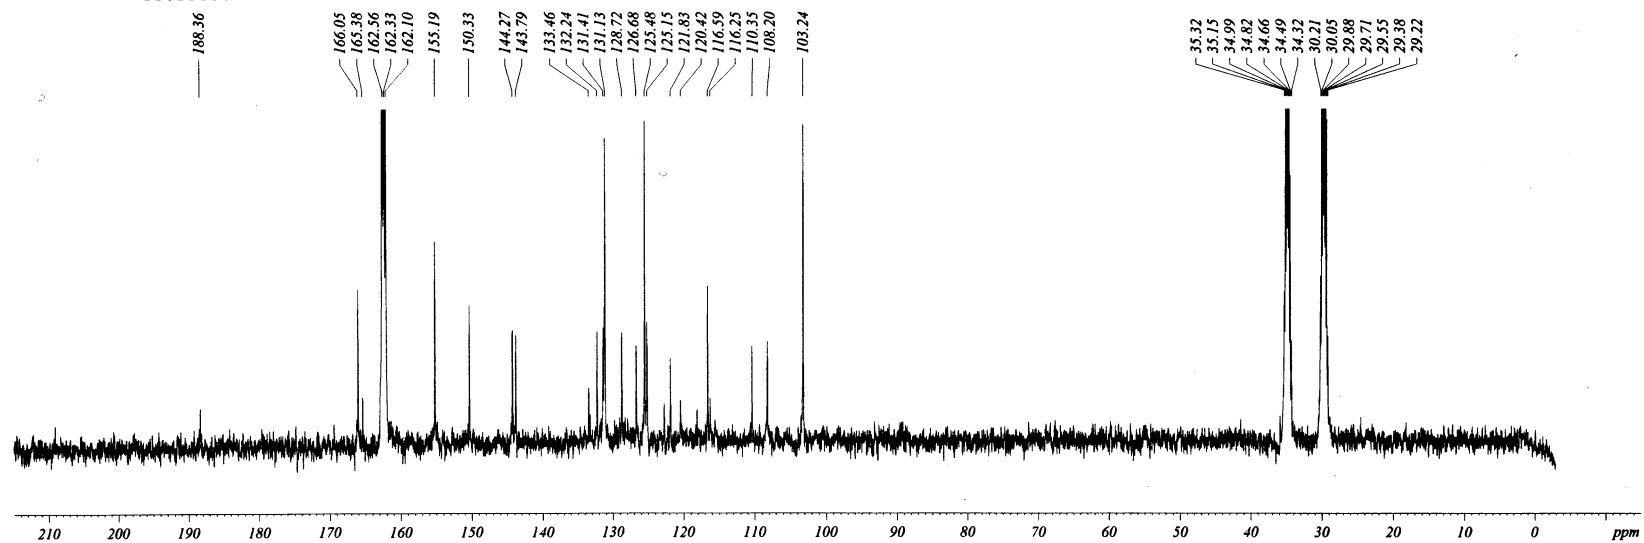

Figure 27.  $^{13}\text{C}$  NMR (125 MHz,  $\text{DMF-d}_6$ ) spectra of compound 4m

YUNNAN UNIVER. AV. DRX500  
huangchao hc6n in DMF  
10122801

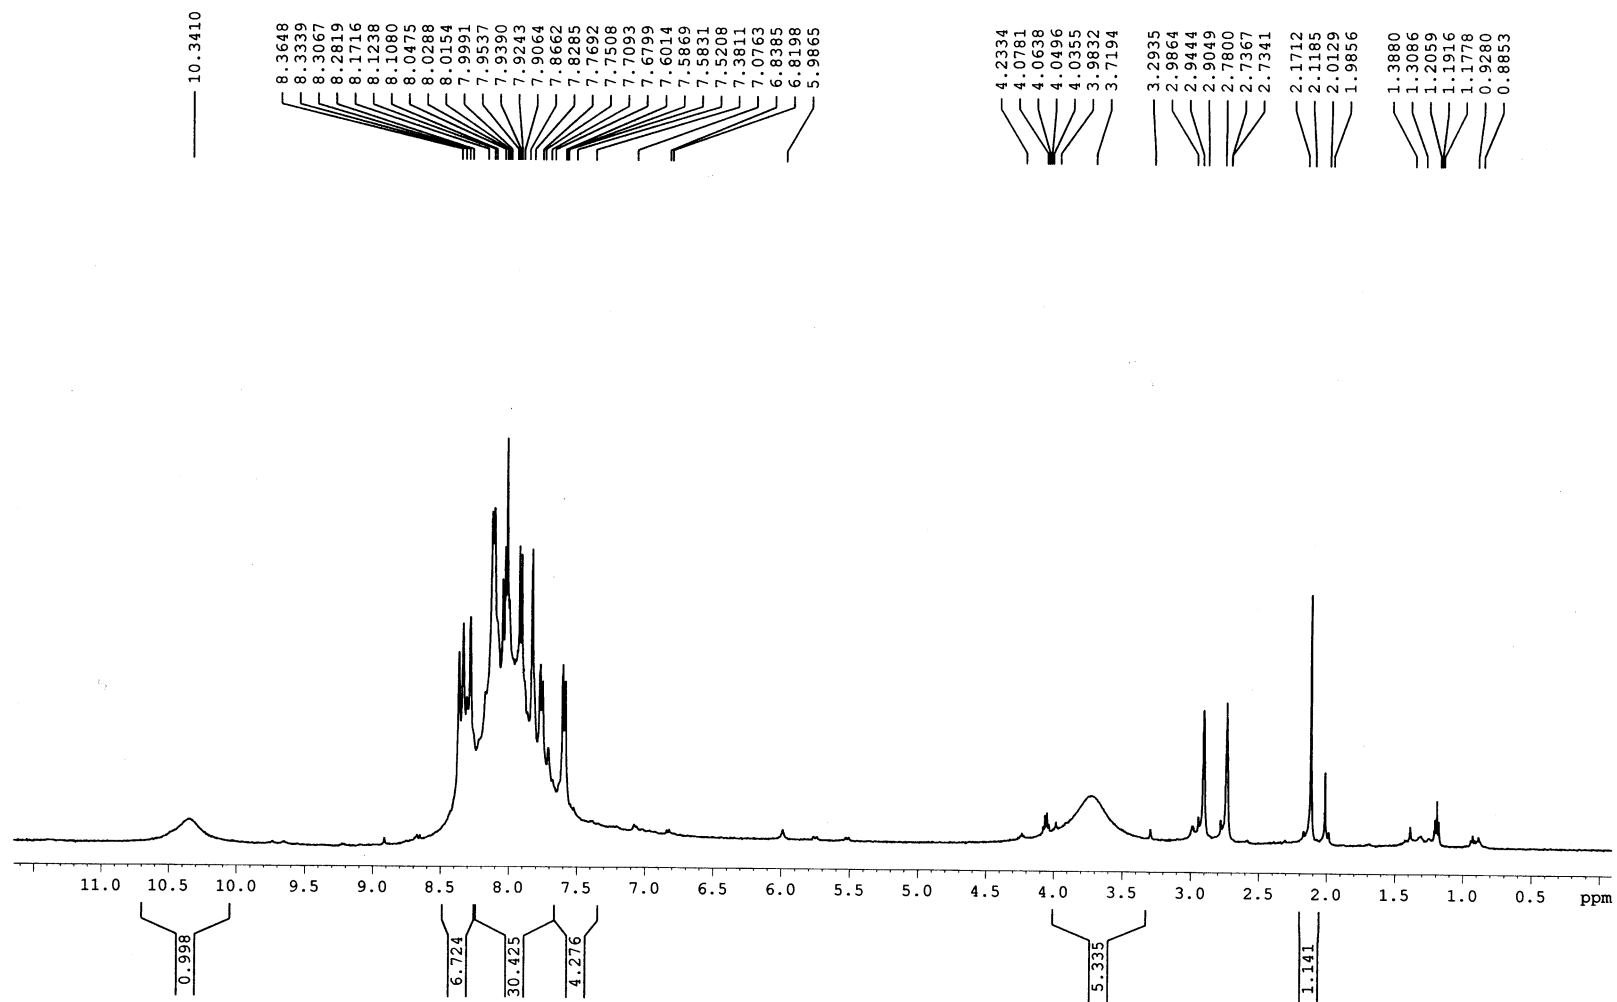

Figure 28.  $^1\text{H}$  NMR (500 MHz,  $\text{DMF-}d_6$ ) spectra of compound **4n**

DEPT135

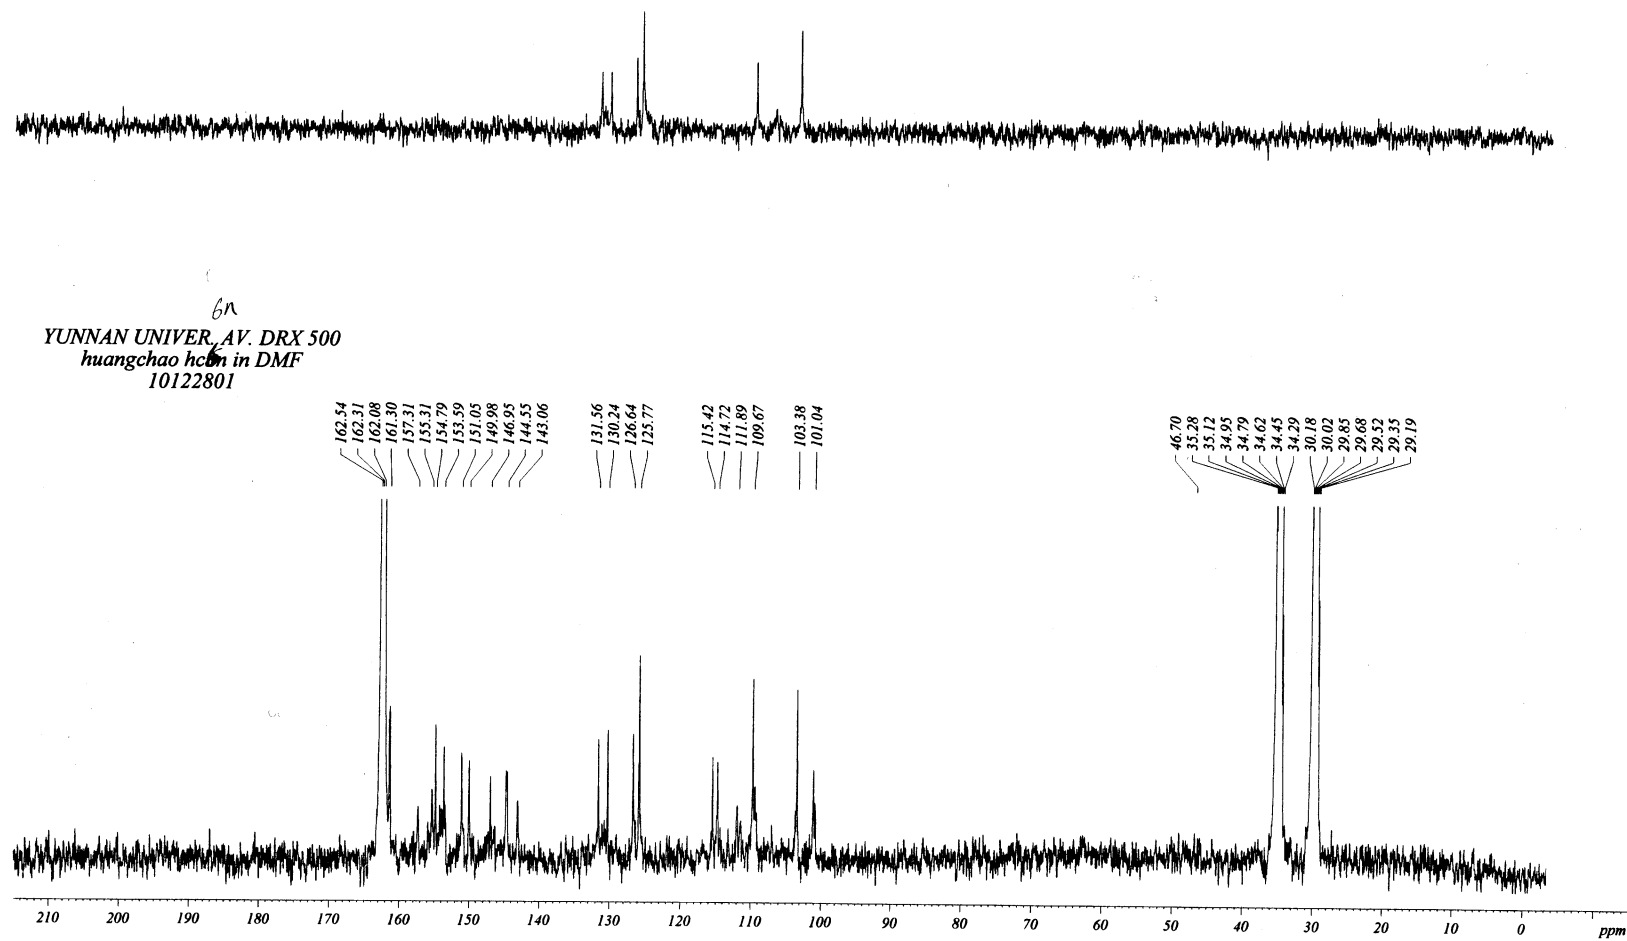

Figure 29.  $^{13}\text{C}$  NMR (125 MHz,  $\text{DMF-}d_6$ ) spectra of compound 4n

YUNNAN UNIVER. AV. DRX500  
huangchao hc6n in DMF  
19F decoupling  
10122801

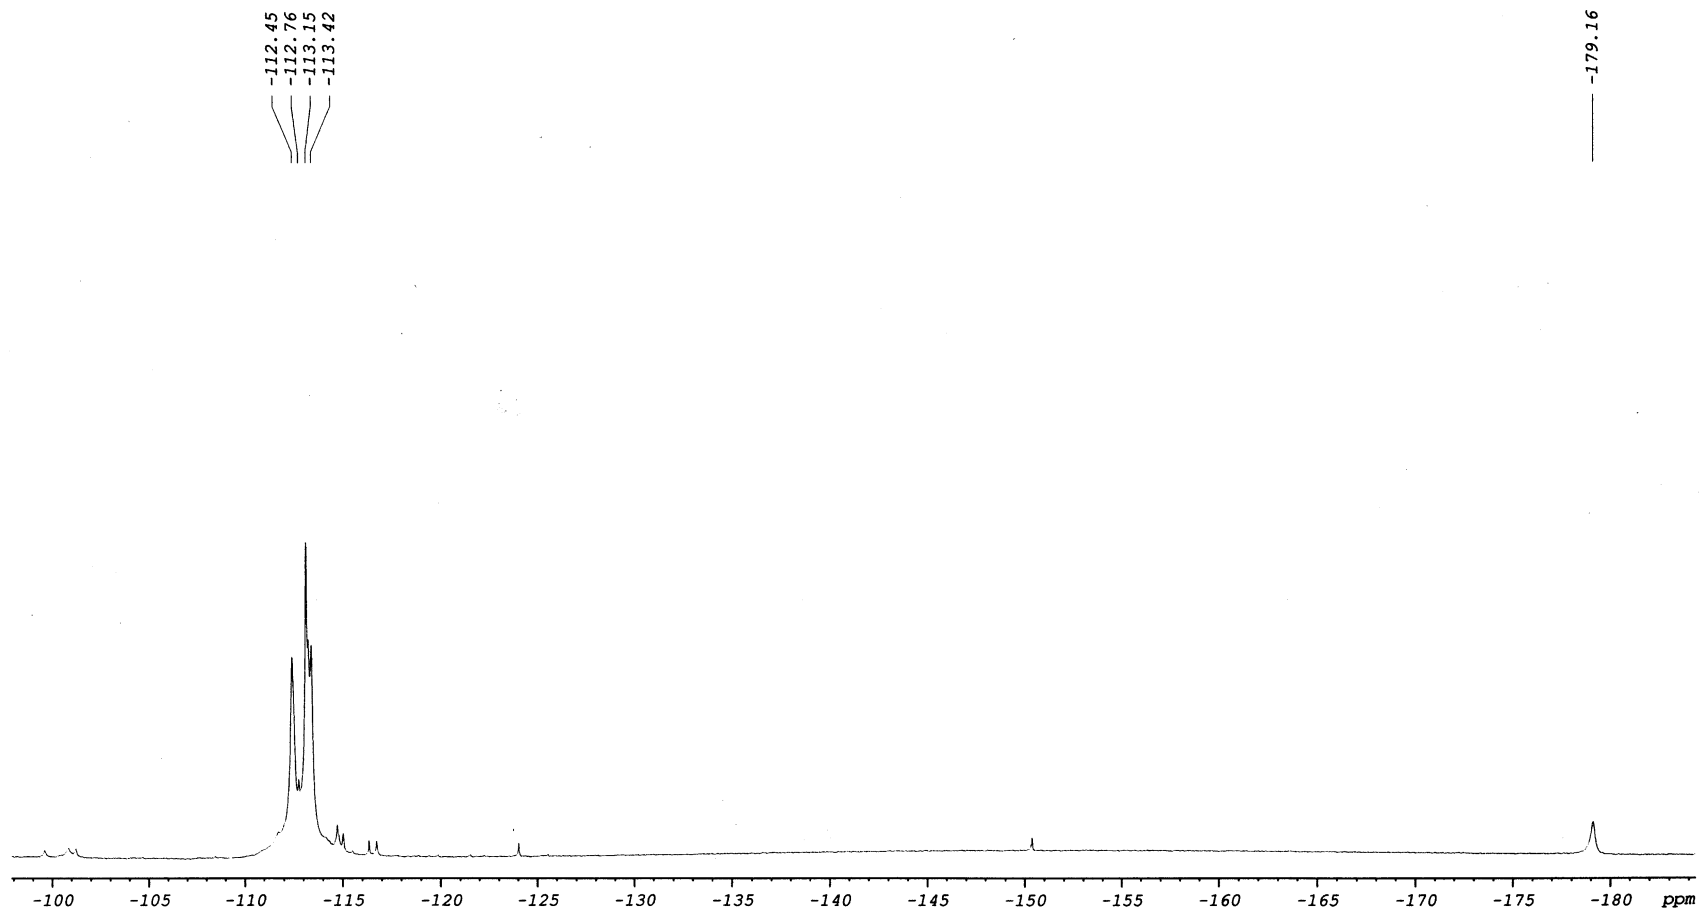

Figure 30.  $^{19}\text{F}$  NMR (470 MHz,  $\text{DMF-d}_6$ ) spectra of compound **4n**

YUNNAN UNIVER. AV. DRX500  
huangchao hc6o in DMF  
10122802

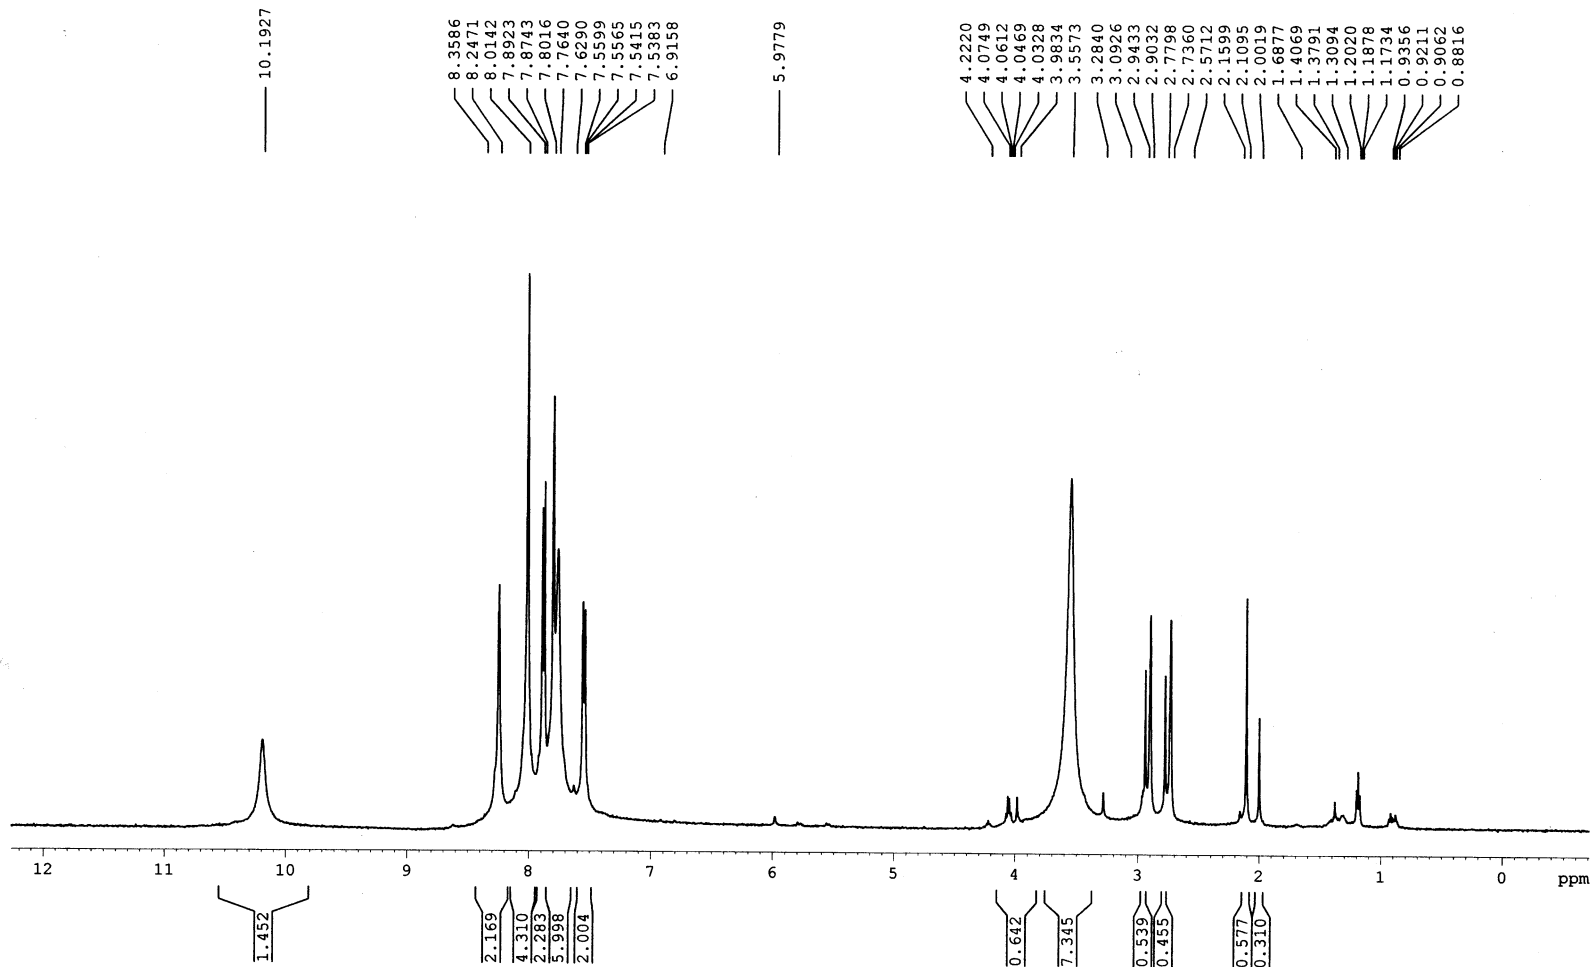

Figure 31.  $^1\text{H}$  NMR (500 MHz,  $\text{DMF-}d_6$ ) spectra of compound **4o**

DEPT135

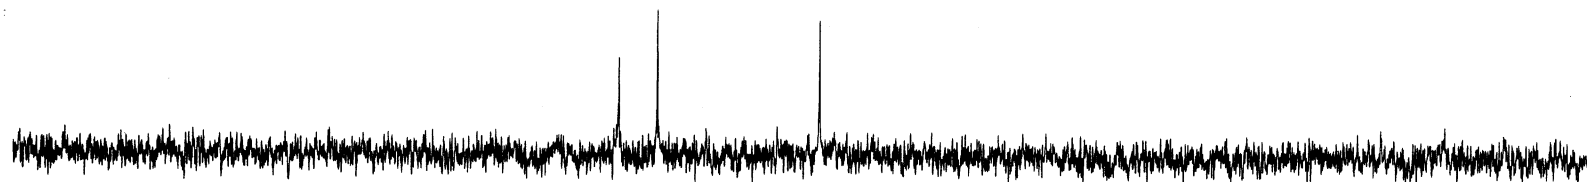

YUNNAN UNIVER. AV. DRX 500  
huangchao hc6o in DMF  
10122802

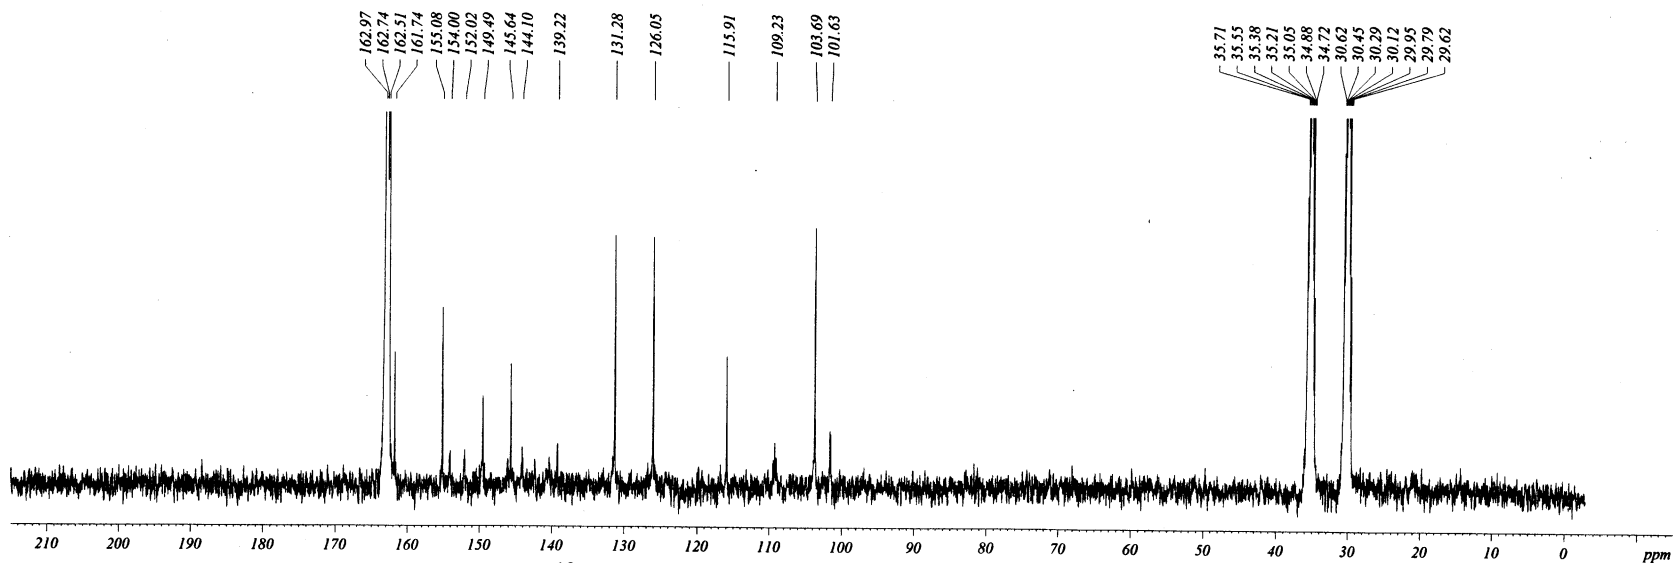

Figure 32.  $^{13}\text{C}$  NMR (125 MHz,  $\text{DMF-}d_6$ ) spectra of compound **4o**

YUNNAN UNIVER. AV. DRX500  
huangchao hc60 in DMF  
19F decoupling  
10122802

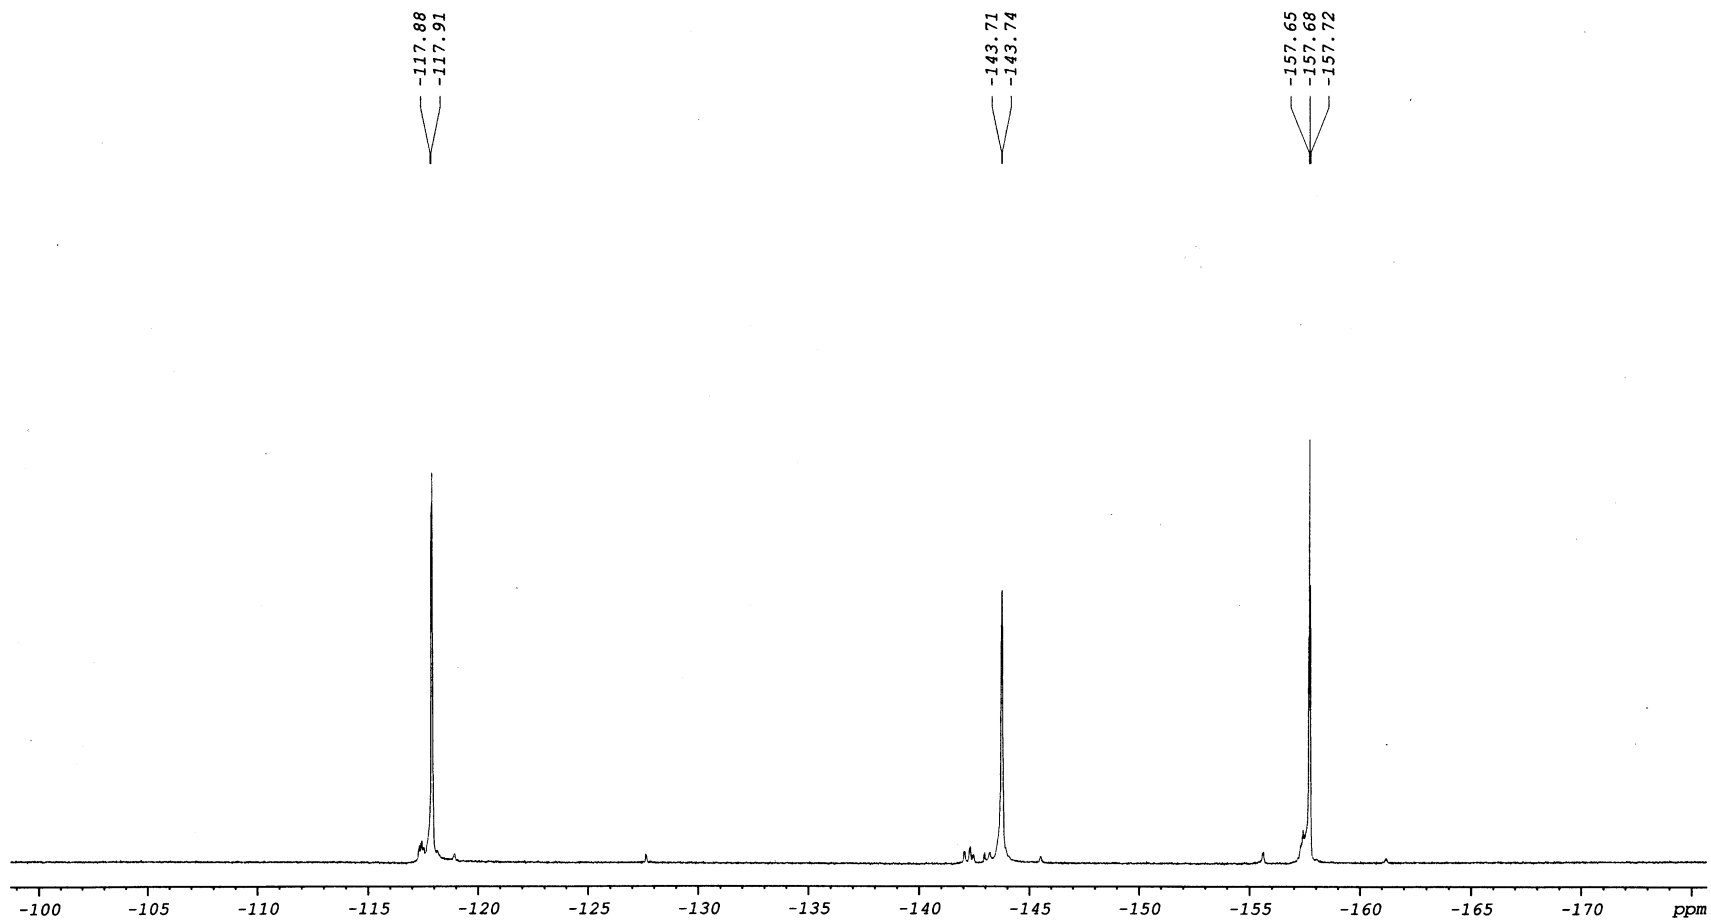

Figure 33.  $^{19}\text{F}$  NMR (470 MHz,  $\text{DMF-d}_6$ ) spectra of compound **4o**

YUNNAN UNIVER. AV. DRX500  
yanglijuan YLJ-503-7a in DMSO

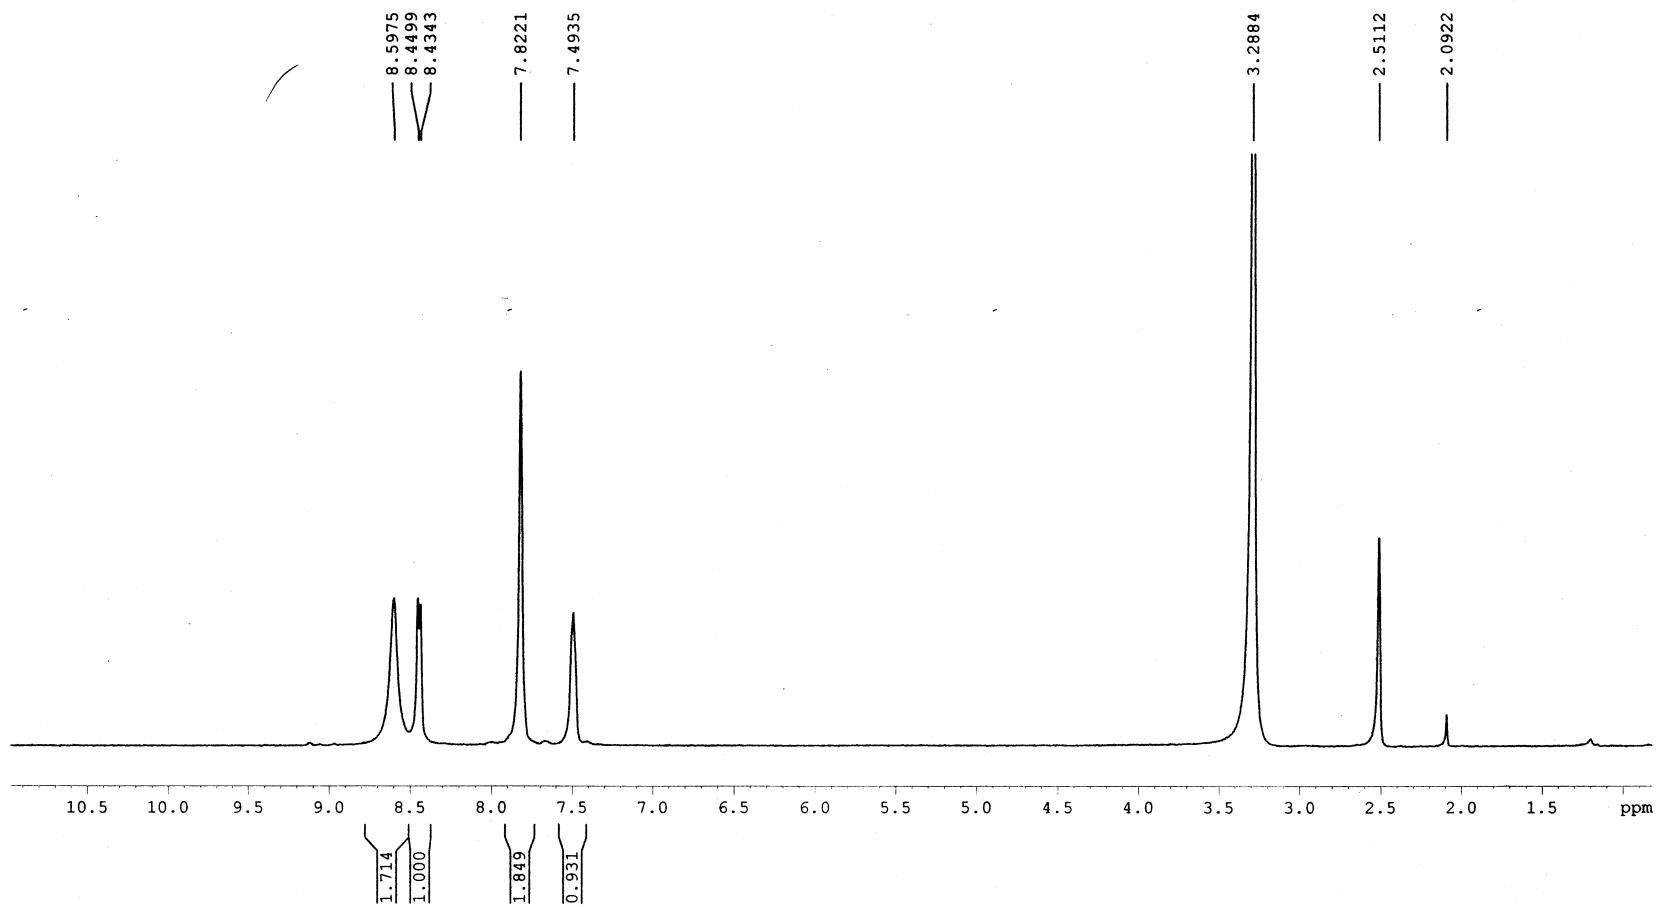

Figure 34.  $^1\text{H}$  NMR (500 MHz,  $\text{DMSO-}d_6$ ) spectra of compound 5a



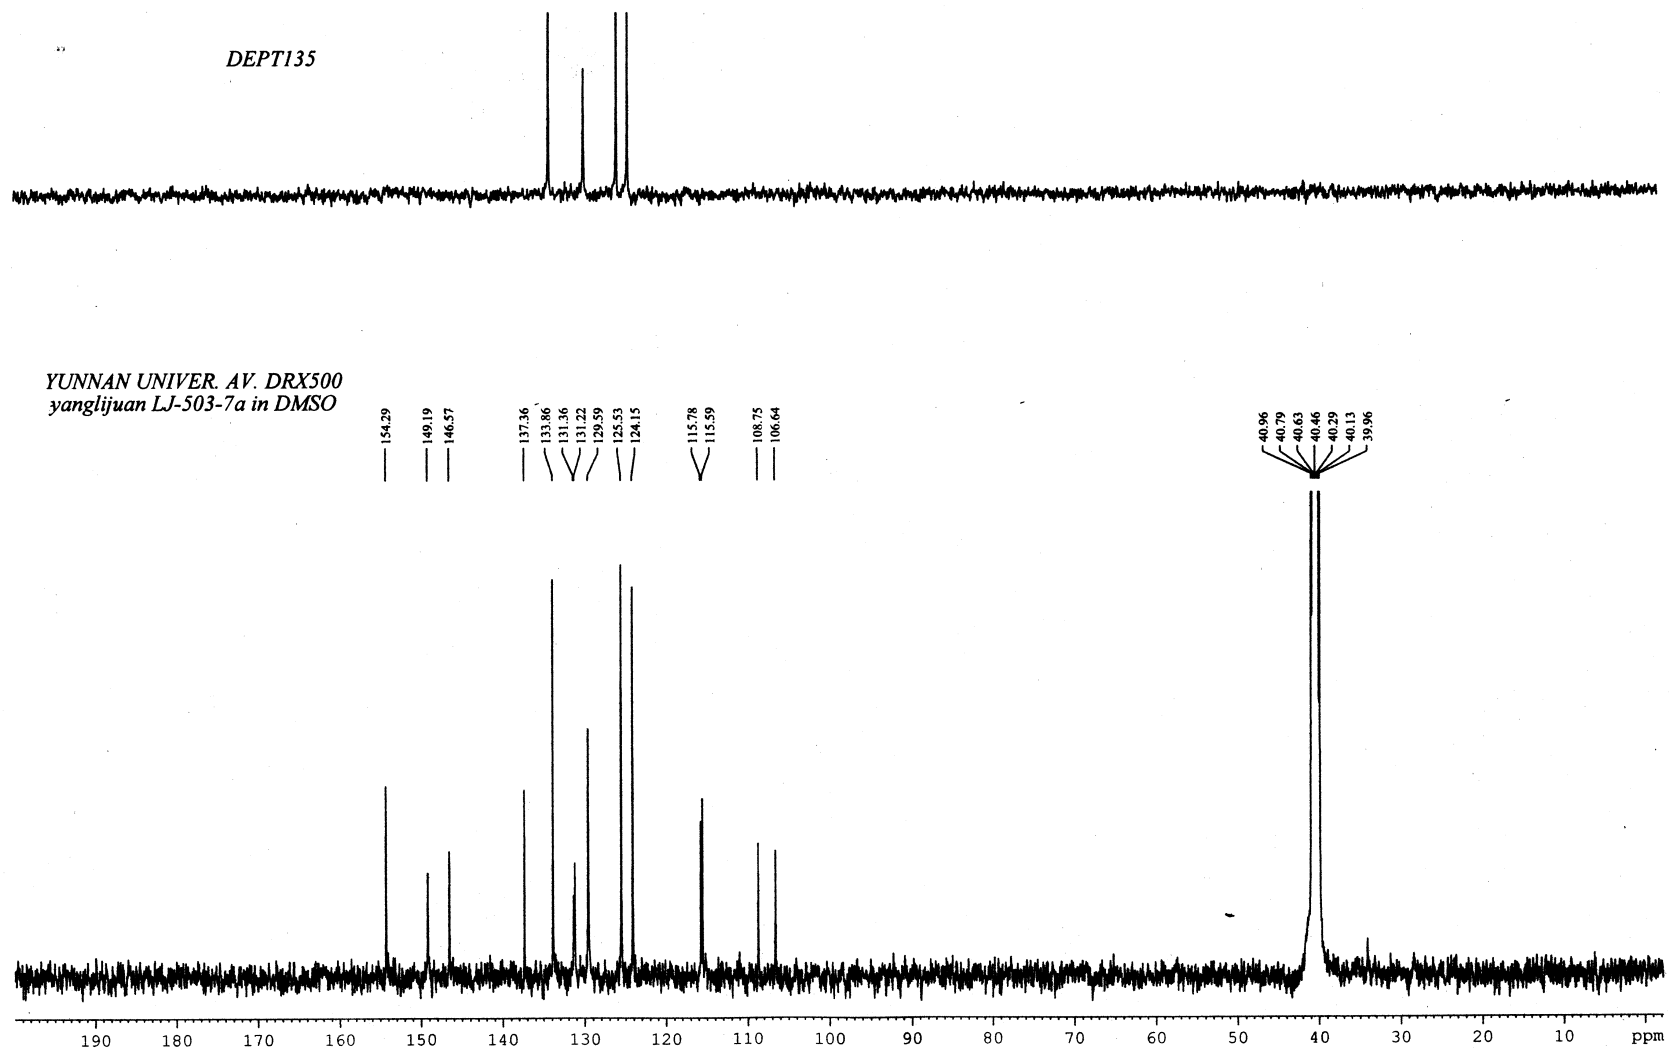

Figure 35.  $^{13}\text{C}$  NMR (125 MHz,  $\text{DMSO-}d_6$ ) spectra of compound 5a

YUNNAN UNIVER. AV. DRX500  
huangchao hc7b in DMF  
11011806

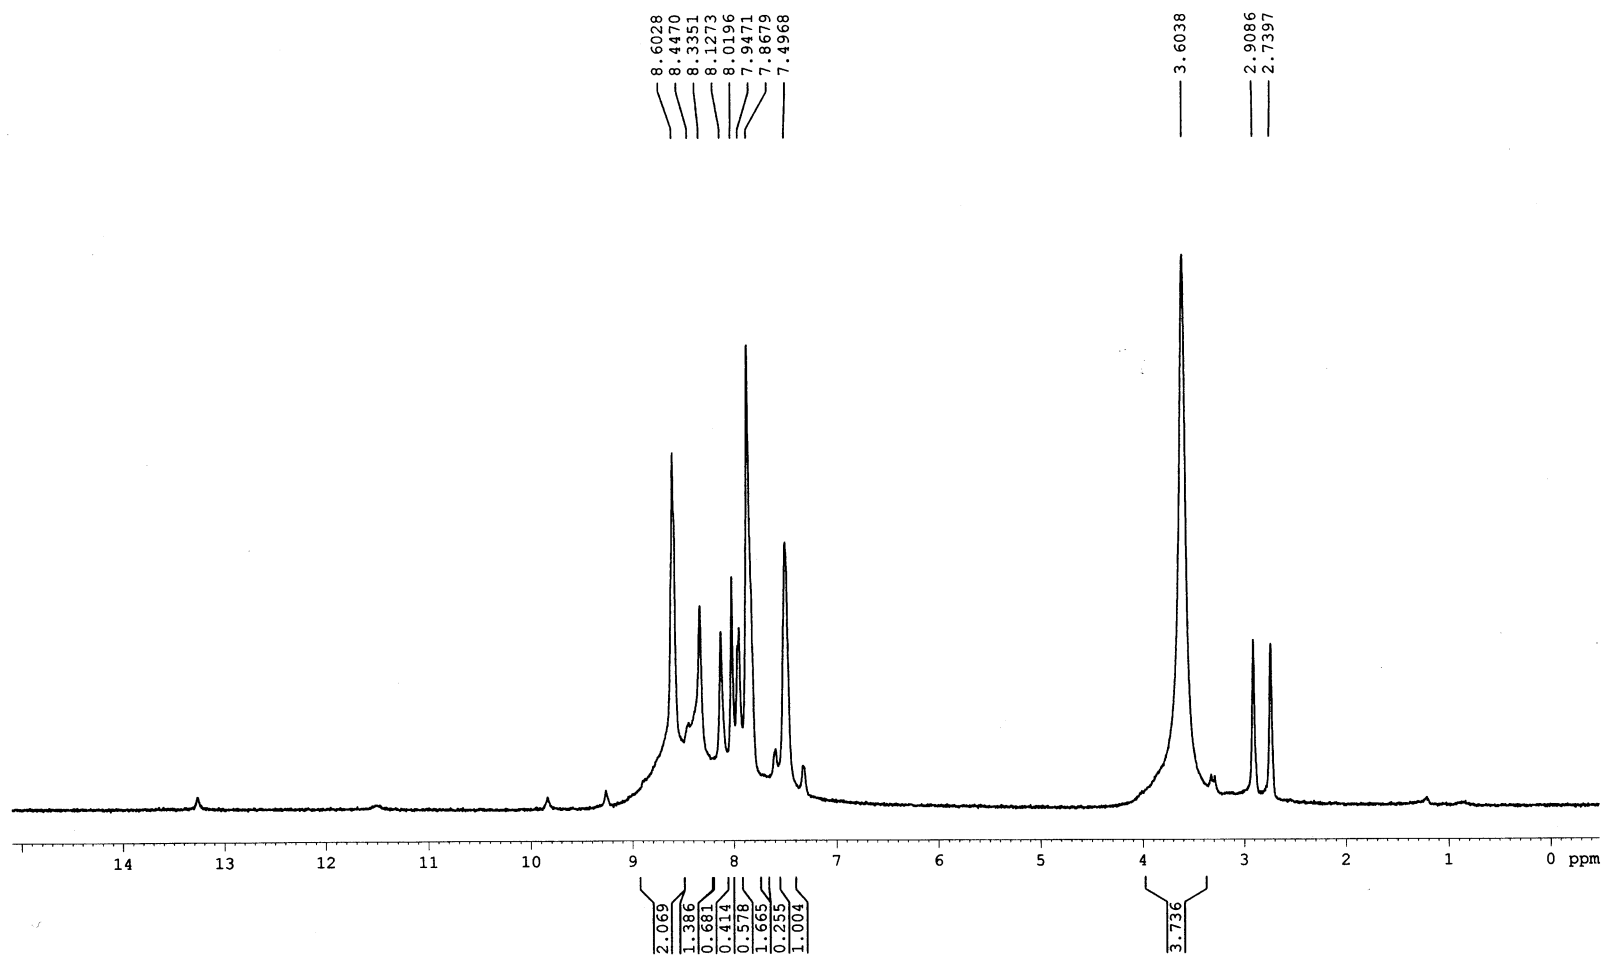

Figure 36.  $^1\text{H}$  NMR (500 MHz,  $\text{DMF-}d_6$ ) spectra of compound **5b**

DEPT135

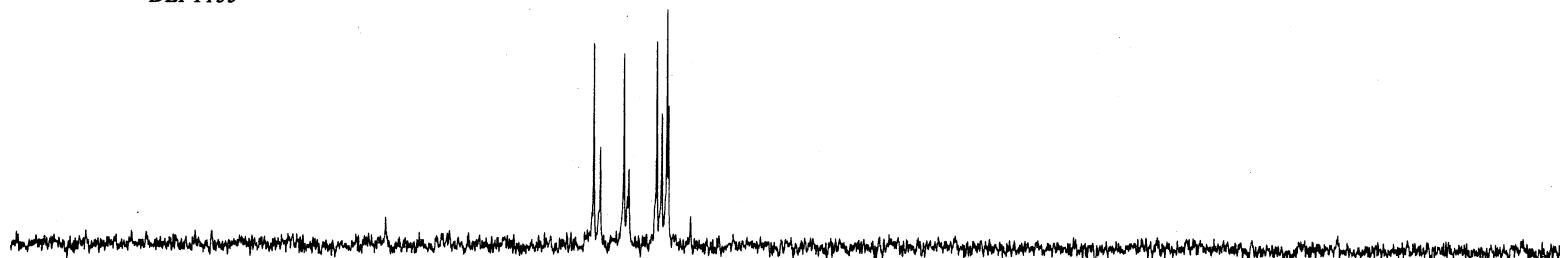

YUNNAN UNIVER. AV. DRX 500  
huangchao hc7b in DMF  
11011806

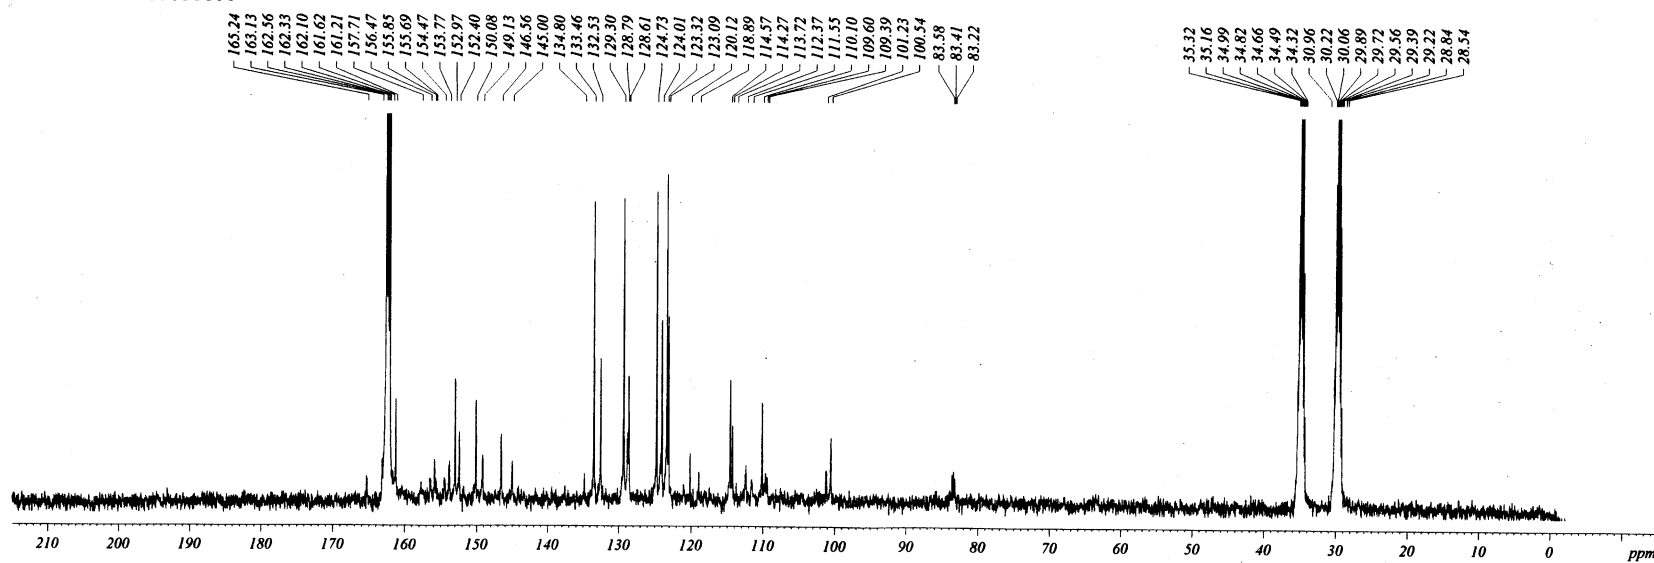

Figure 37.  $^{13}\text{C}$  NMR (125 MHz,  $\text{DMF-}d_6$ ) spectra of compound 5b

YUNNAN UNIVER. AV. DRX500  
huangchao hc7b in DMF  
19F decoupling 11011806

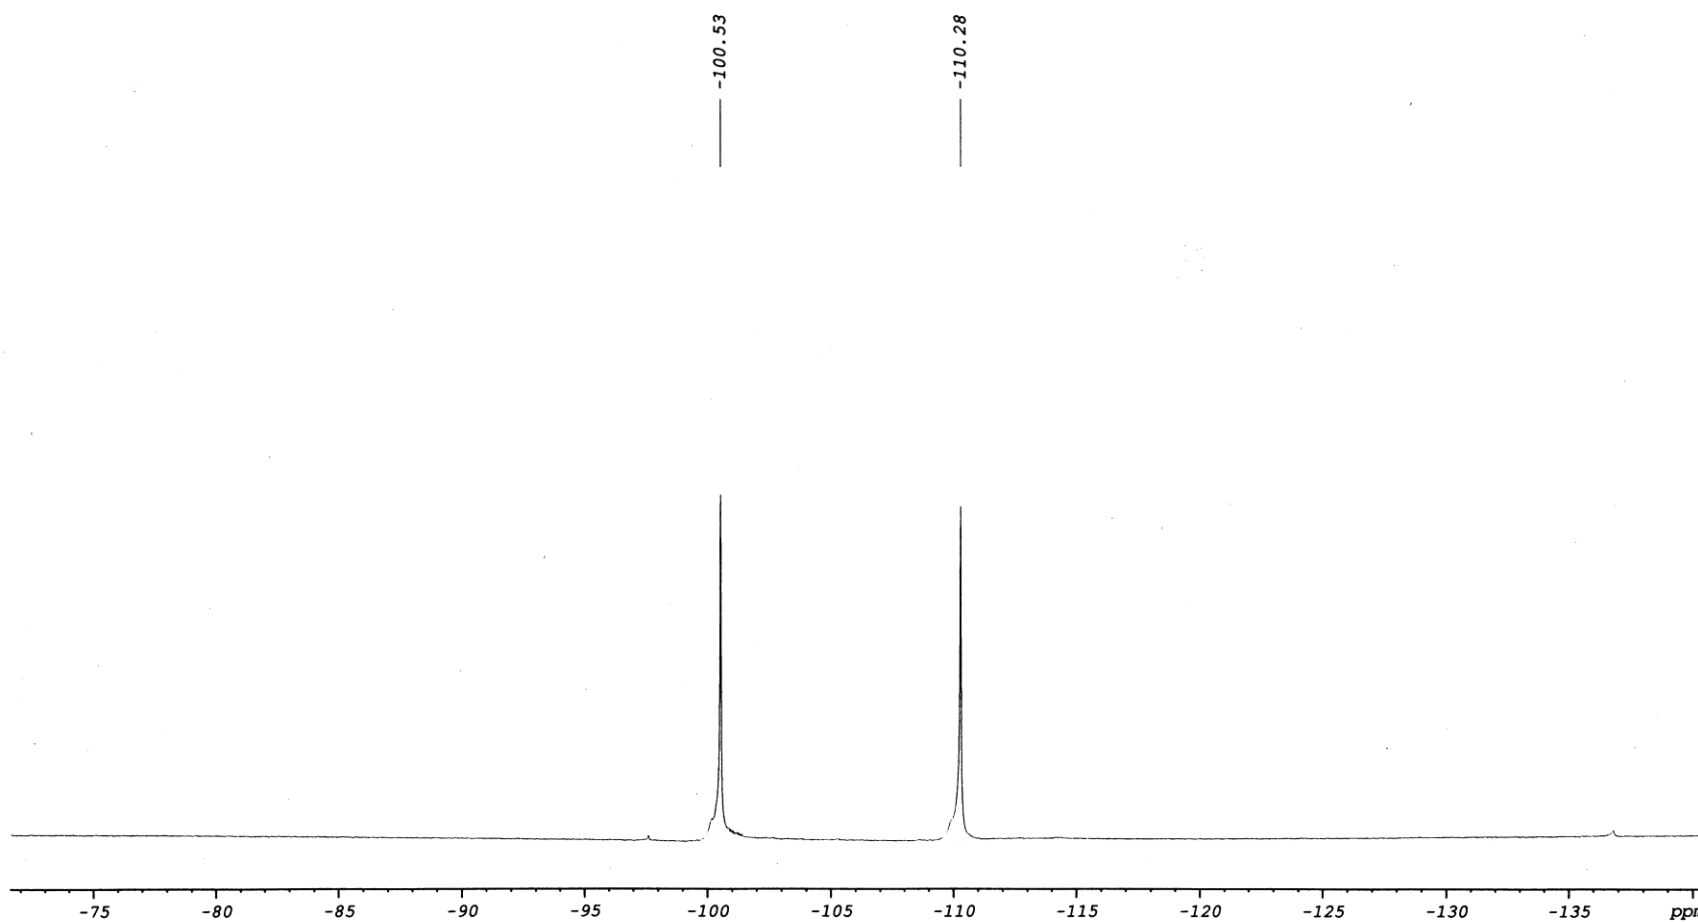

Figure 38.  $^{19}\text{F}$  NMR (470 MHz,  $\text{DMF-}d_6$ ) spectra of compound **5b**

YUNNAN UNIVER. AV. DRX500  
yanglijuan YLJ-503-7c in DMSO

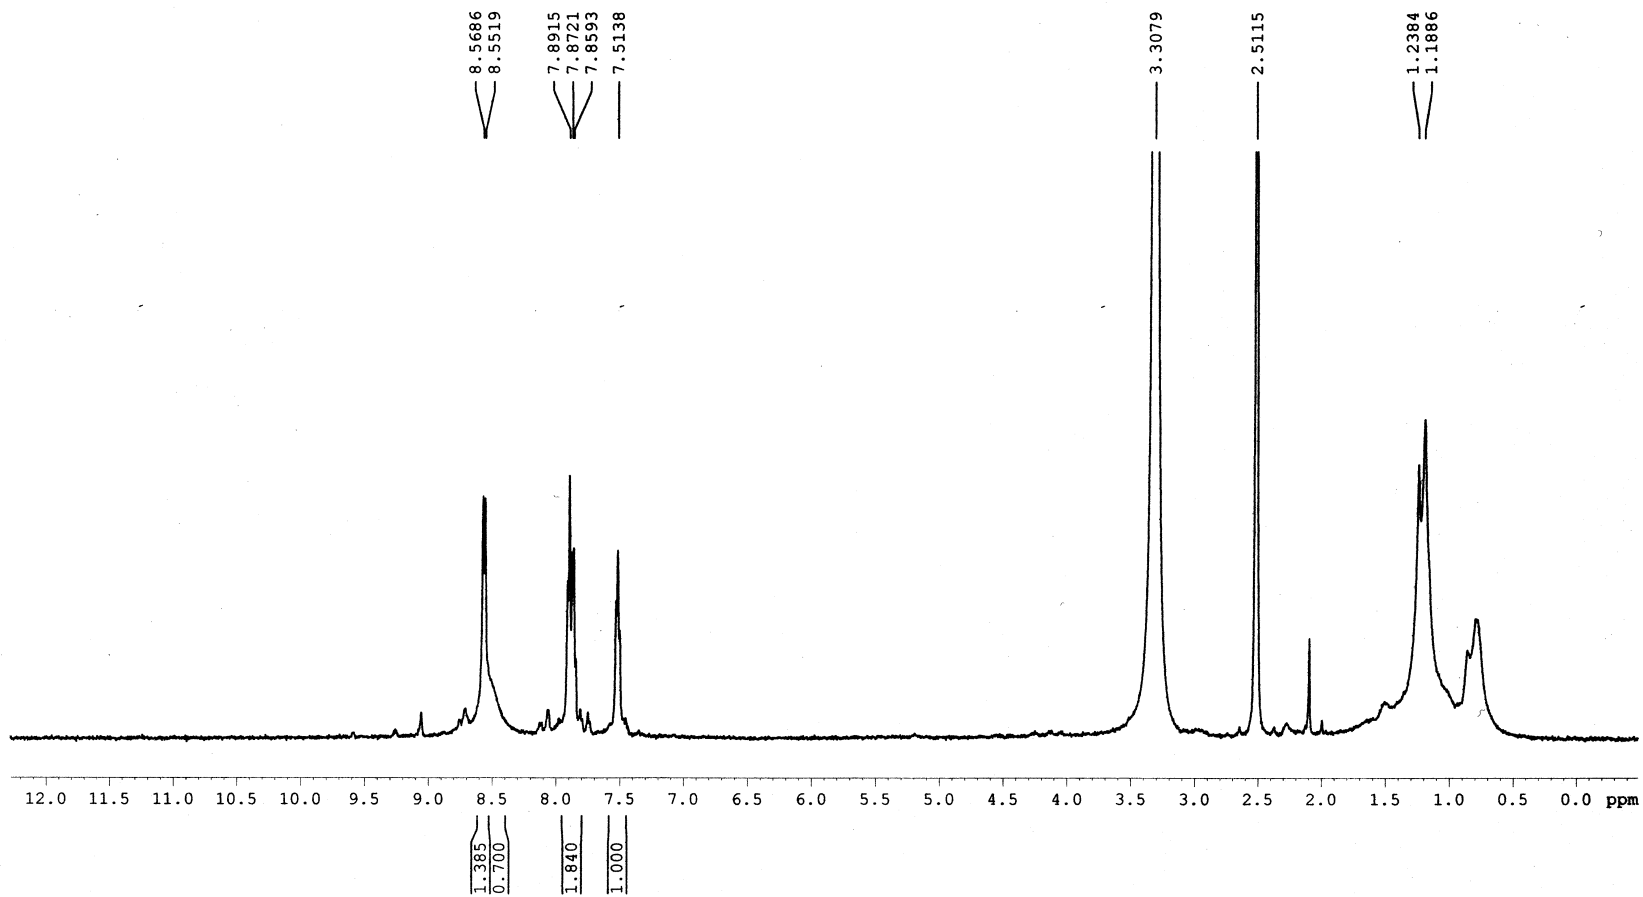

Figure 39.  $^1\text{H}$  NMR (500 MHz,  $\text{DMSO-}d_6$ ) spectra of compound **5c**

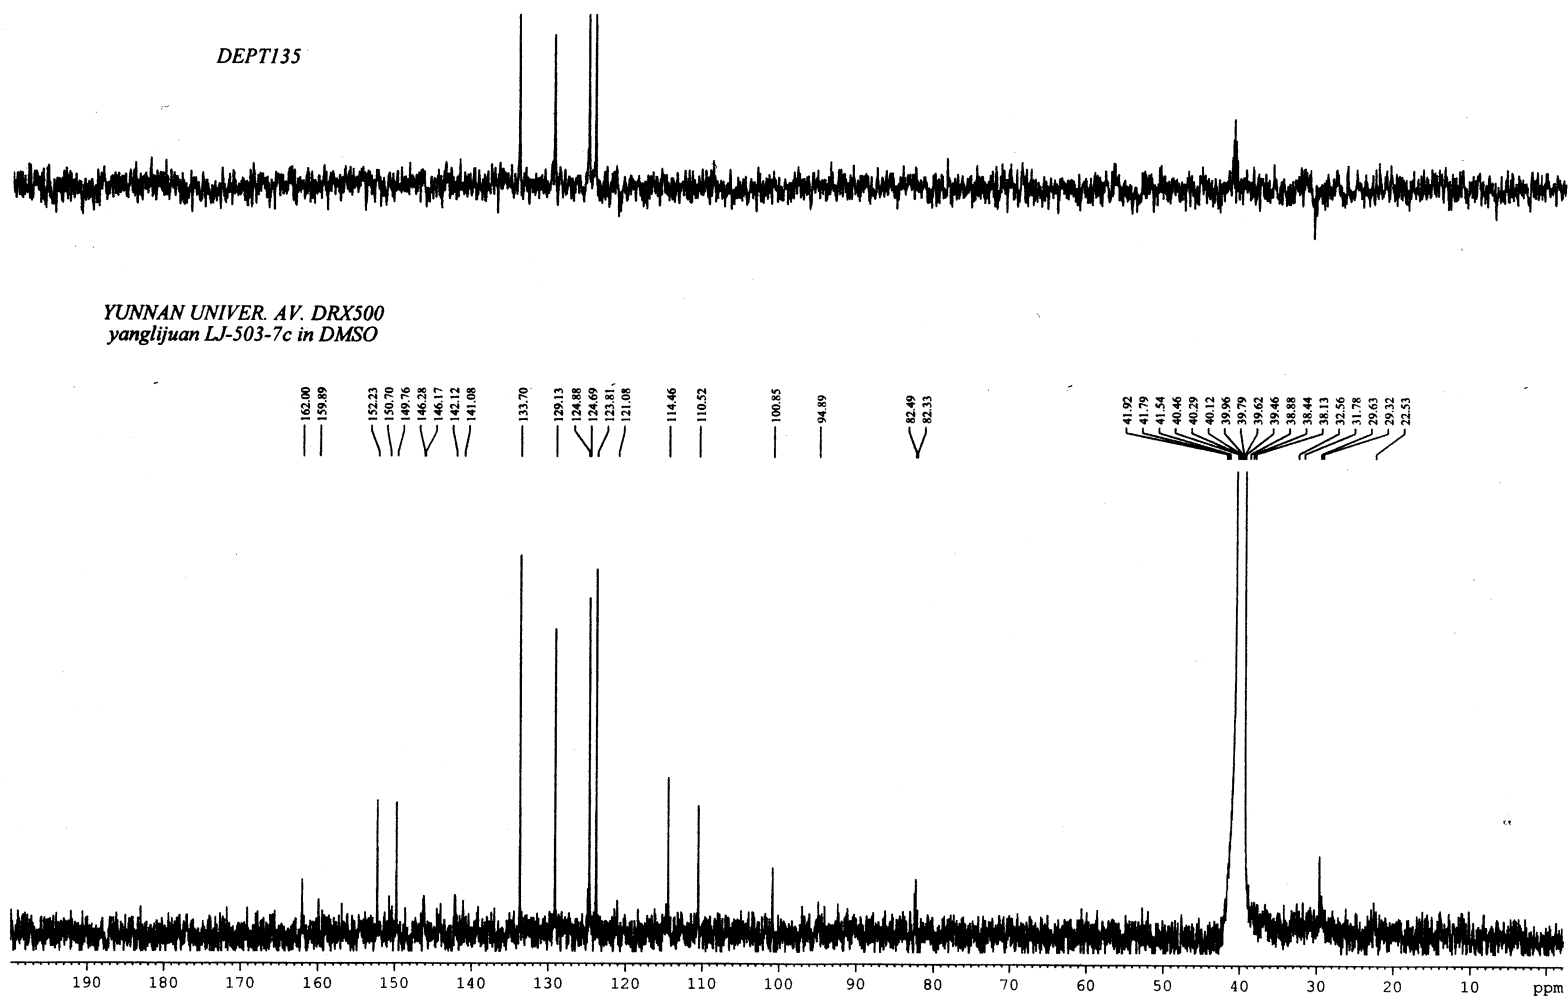

Figure 40.  $^{13}\text{C}$  NMR (125 MHz,  $\text{DMSO-}d_6$ ) spectra of compound **5c**

YUNNAN UNIVER. AV. DRX500  
yanglijuan 503-7c in DMSO  
 $^{19}\text{F}$  decoupling

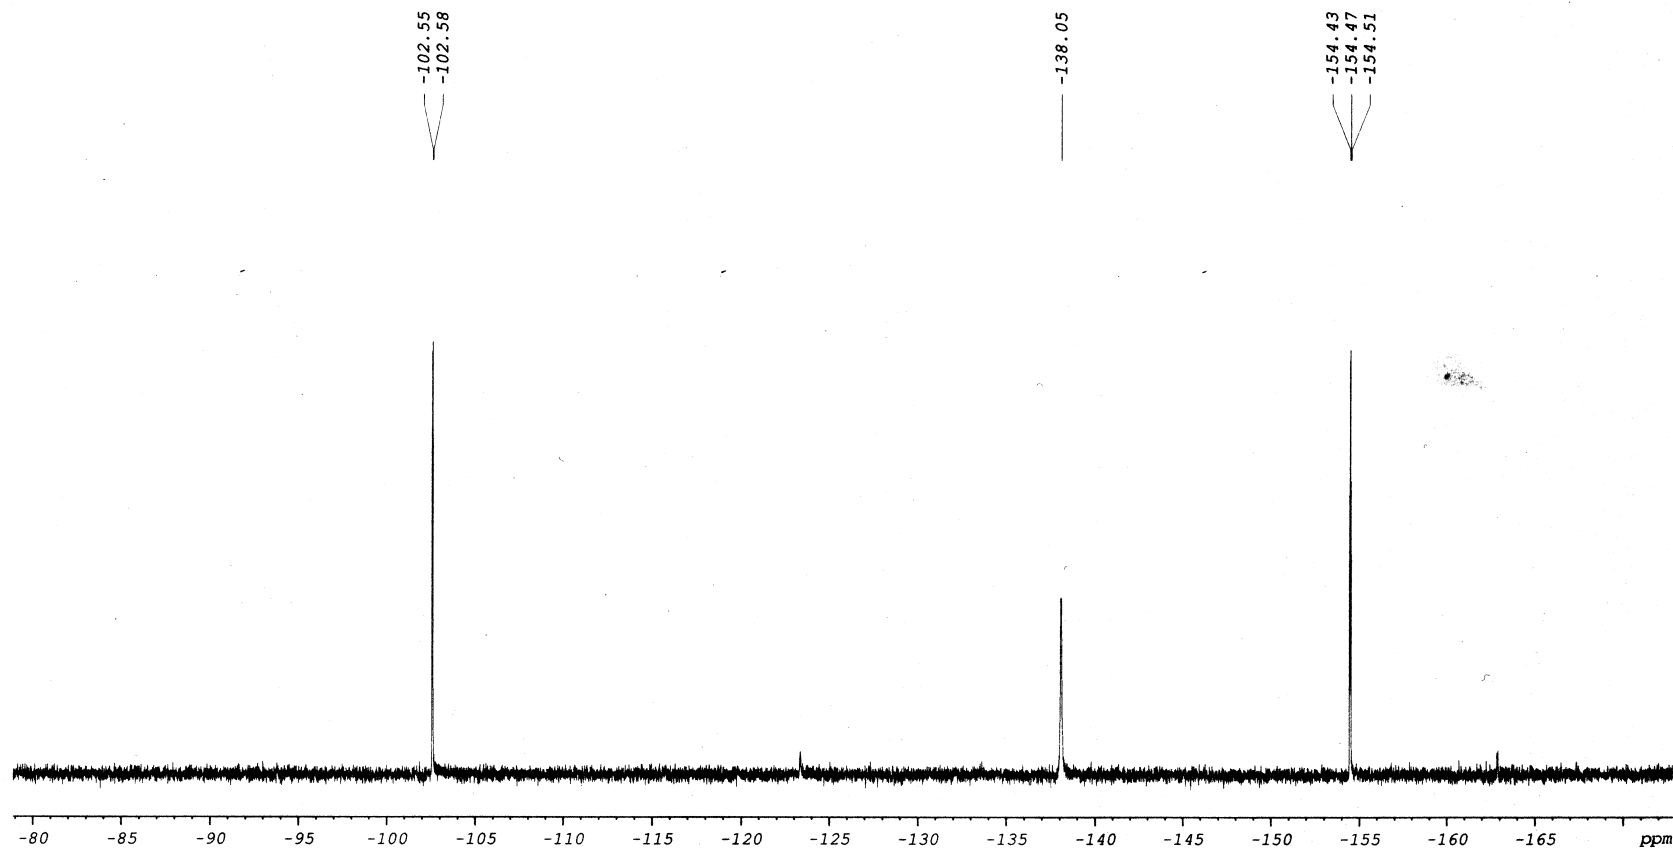

Figure 41.  $^{19}\text{F}$  NMR (470 MHz,  $\text{DMSO-}d_6$ ) spectra of compound 5c

YUNNAN UNIVER. AV. DRX500  
huangchao hc7d in DMF  
11011807

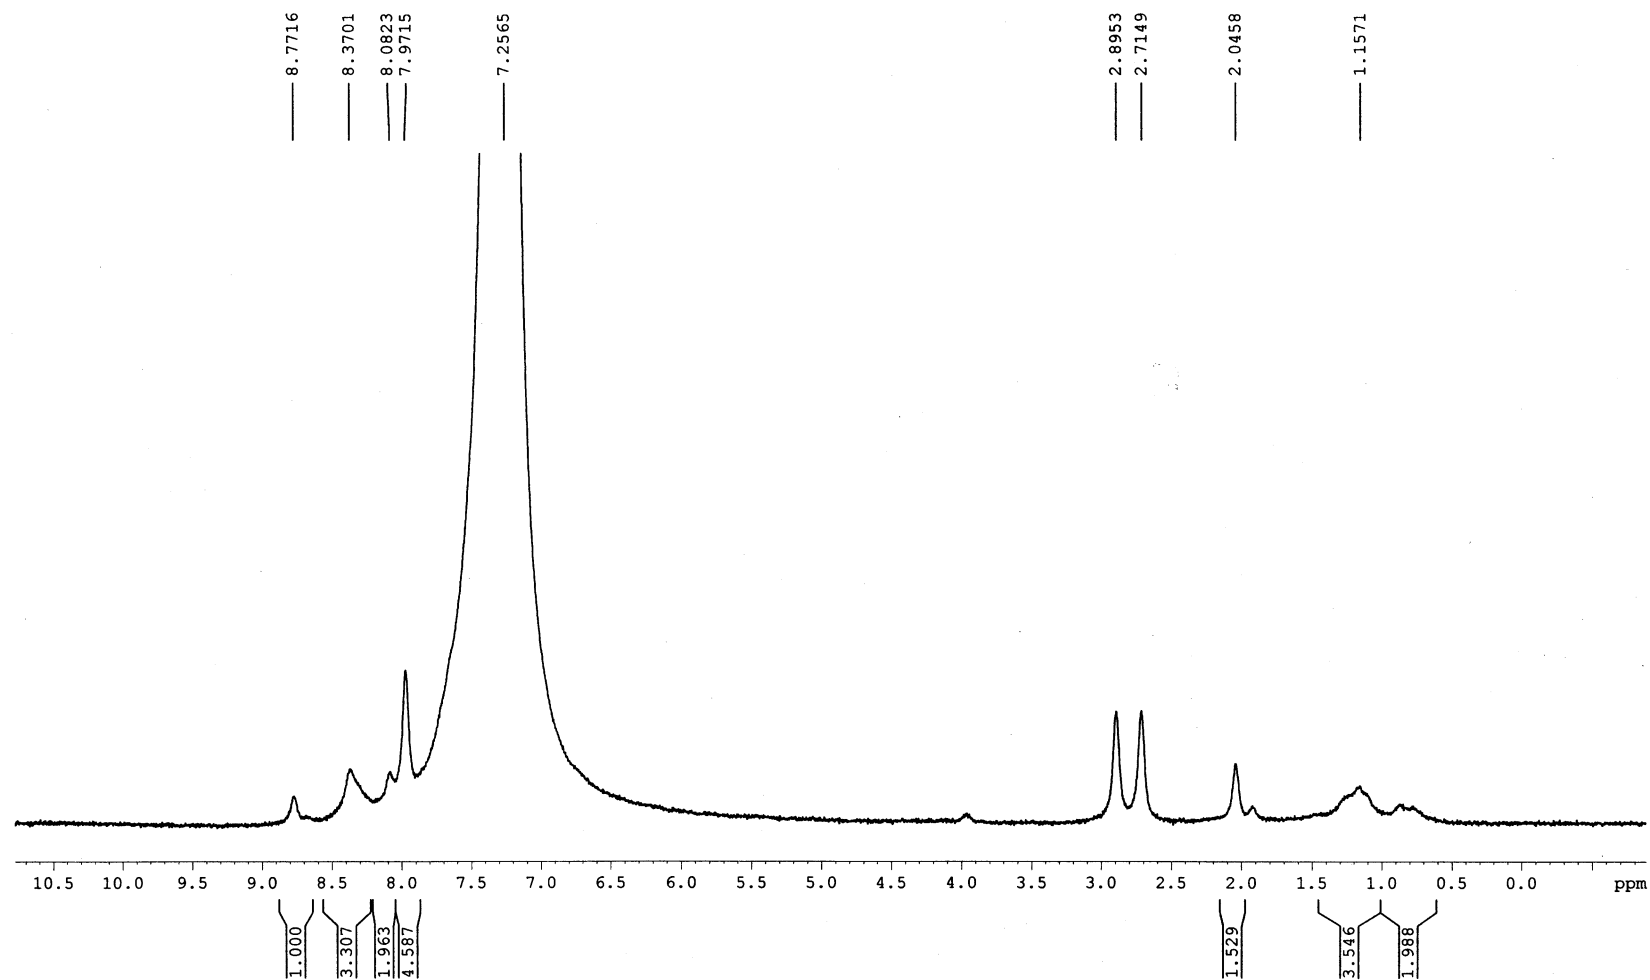

Figure 42.  $^1\text{H}$  NMR (500 MHz,  $\text{DMF-}d_6$ ) spectra of compound **5d**



DEPT135

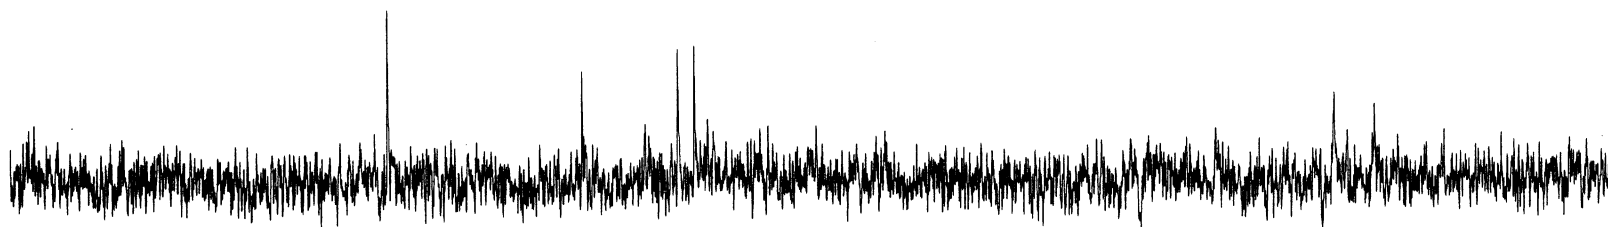

YUNNAN UNIVER. AV. DRX 500  
huangchao hc7d in DMF  
11011807

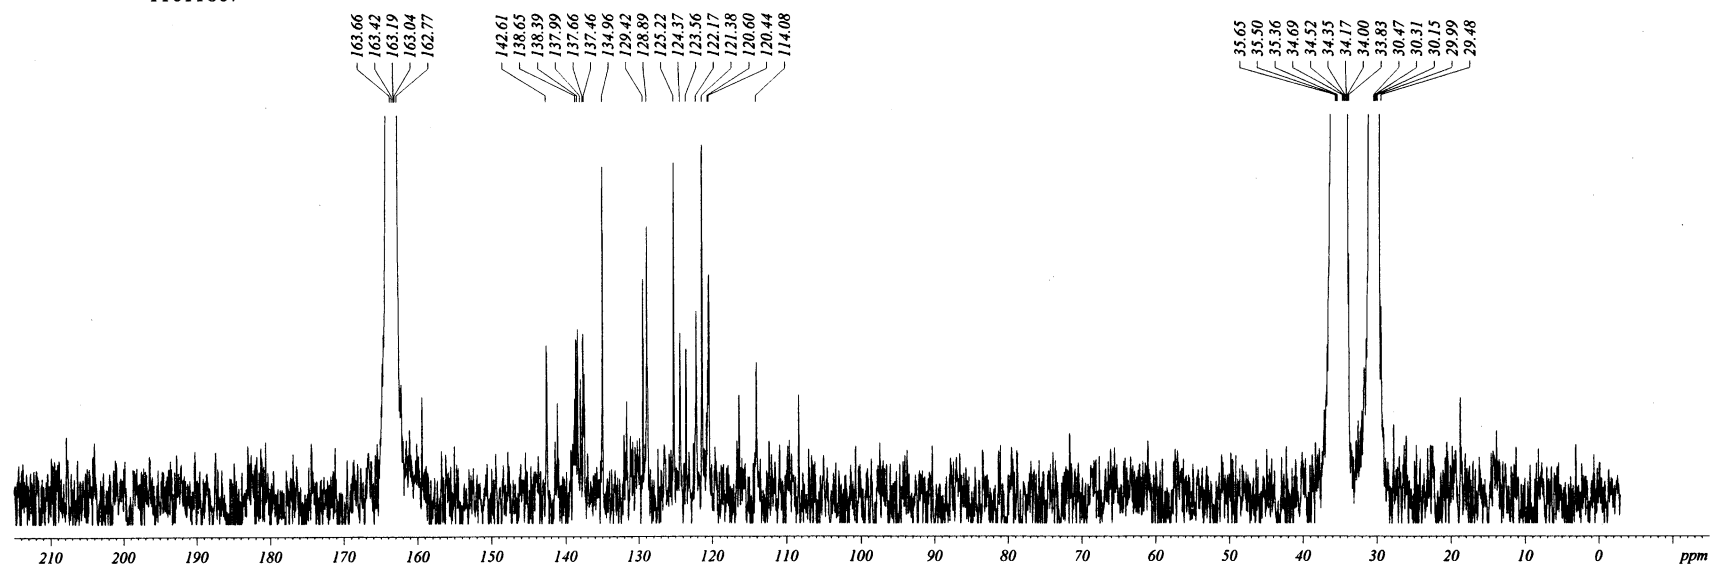

Figure 43. <sup>13</sup>C NMR (125 MHz, DMF-*d*<sub>6</sub>) spectra of compound 5d

YUNNAN UNIVER. AV. DRX500  
yanglijuan YLJ-503-7a in DMSO  
7e

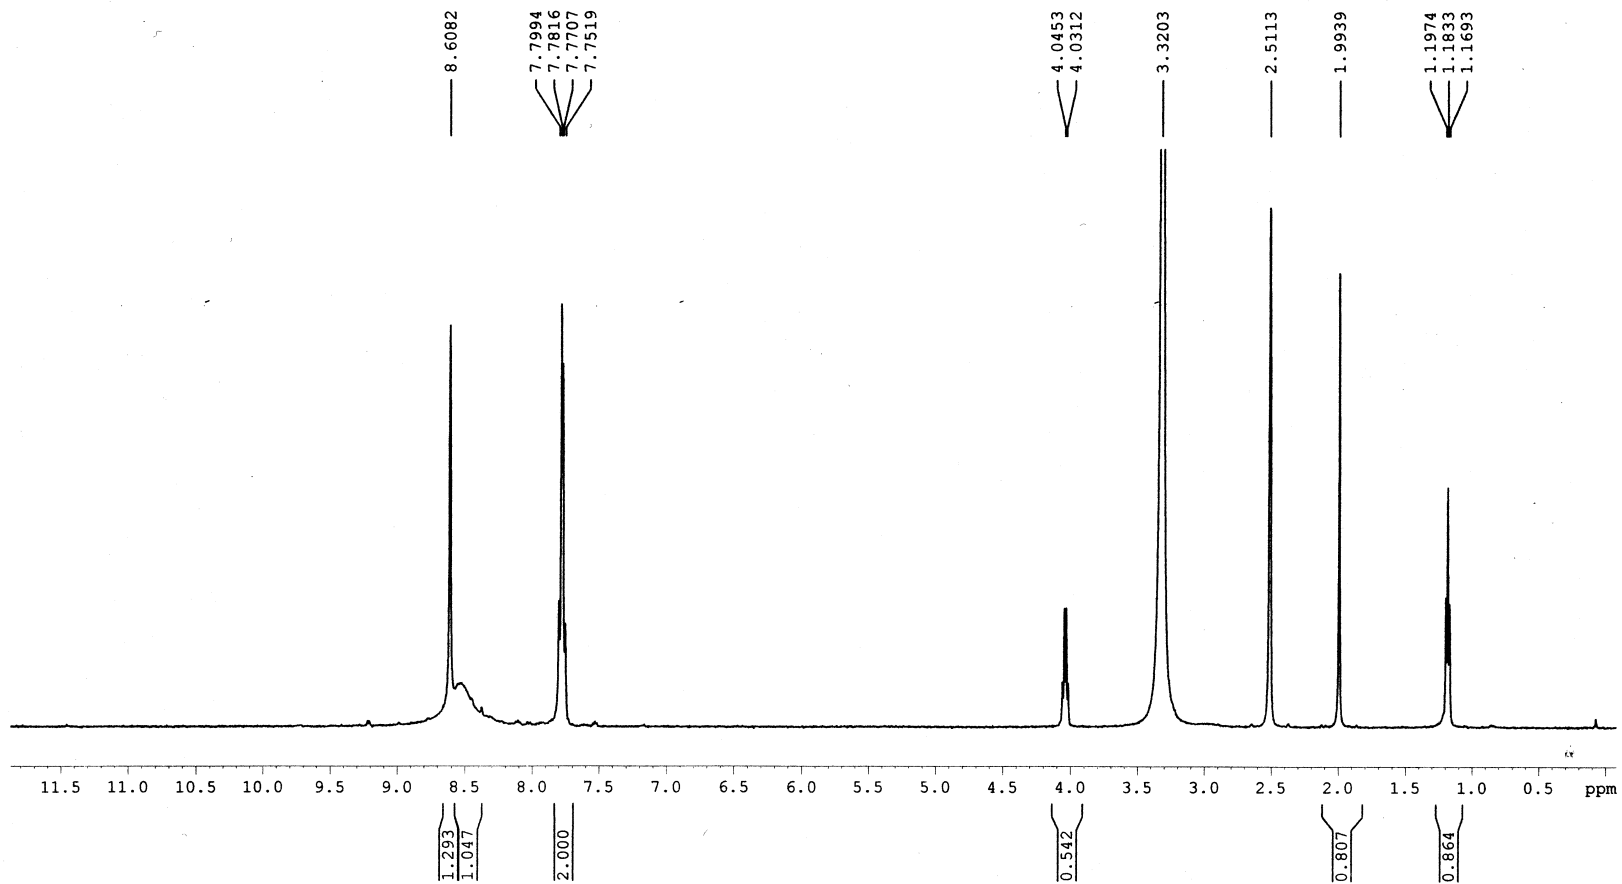

Figure 44.  $^1\text{H}$  NMR (500 MHz,  $\text{DMSO}-d_6$ ) spectra of compound **5e**

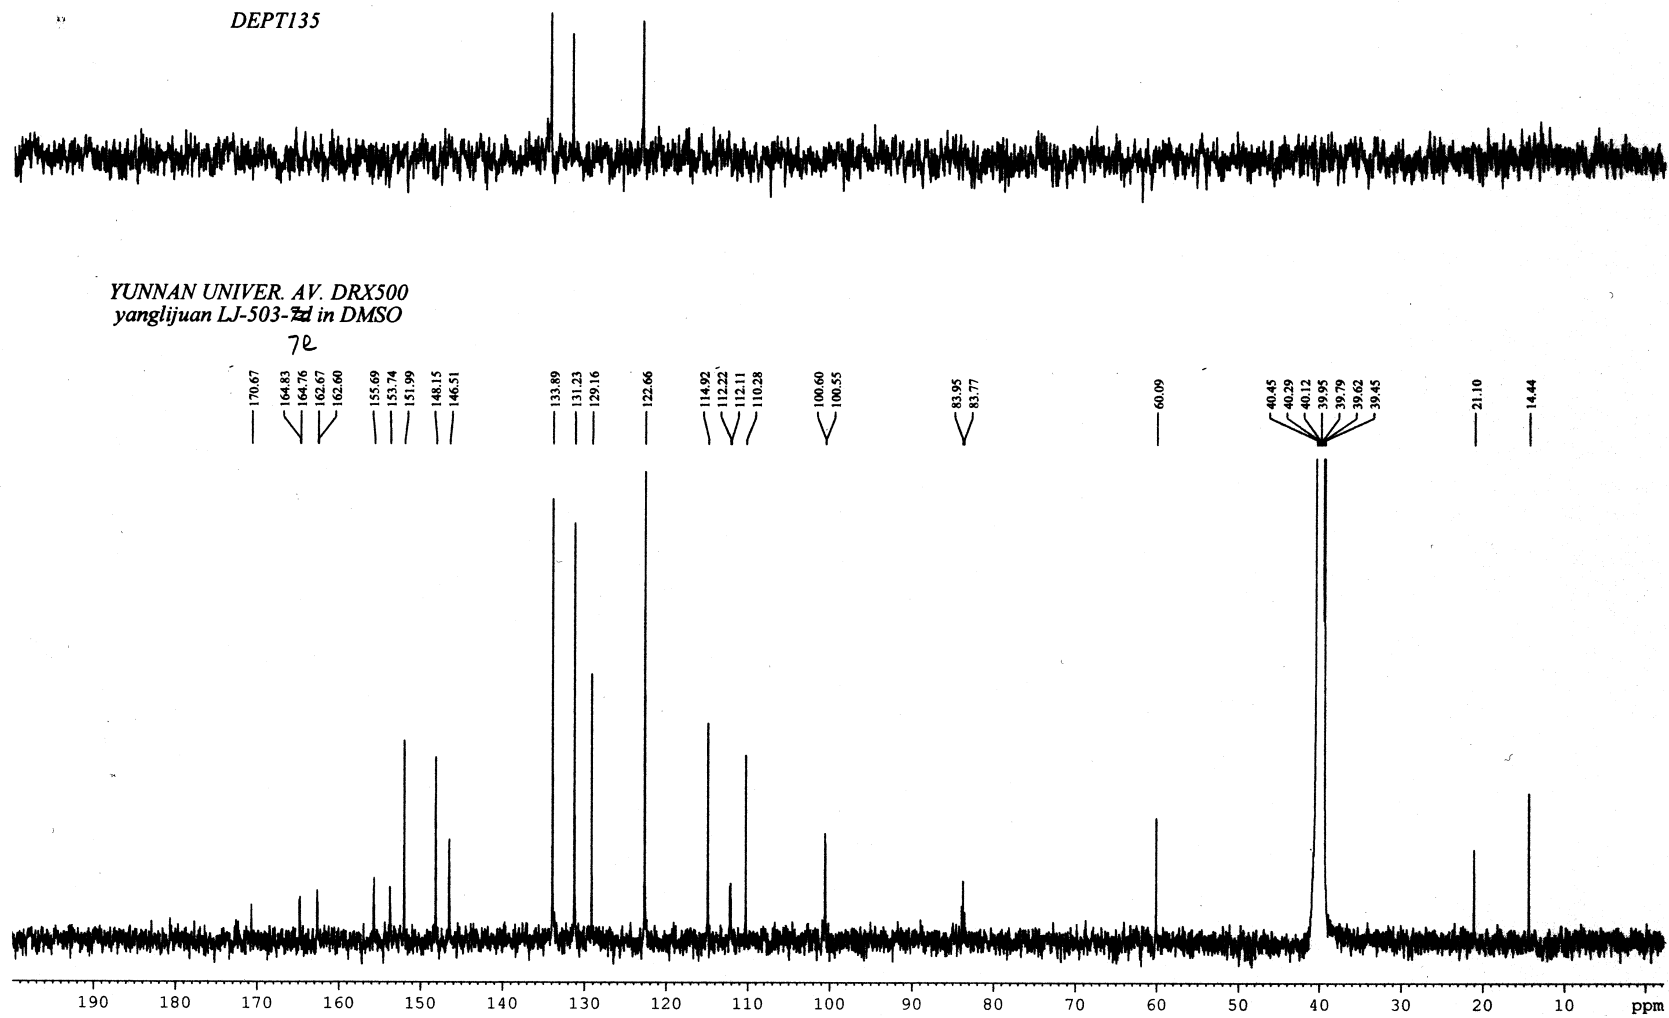

Figure 45.  $^{13}\text{C}$  NMR (125 MHz,  $\text{DMSO-}d_6$ ) spectra of compound **5e**

YUNNAN UNIVER. AV. DRX500  
yanglijuan 503-7a in DMSO  
19F decoupling 7e

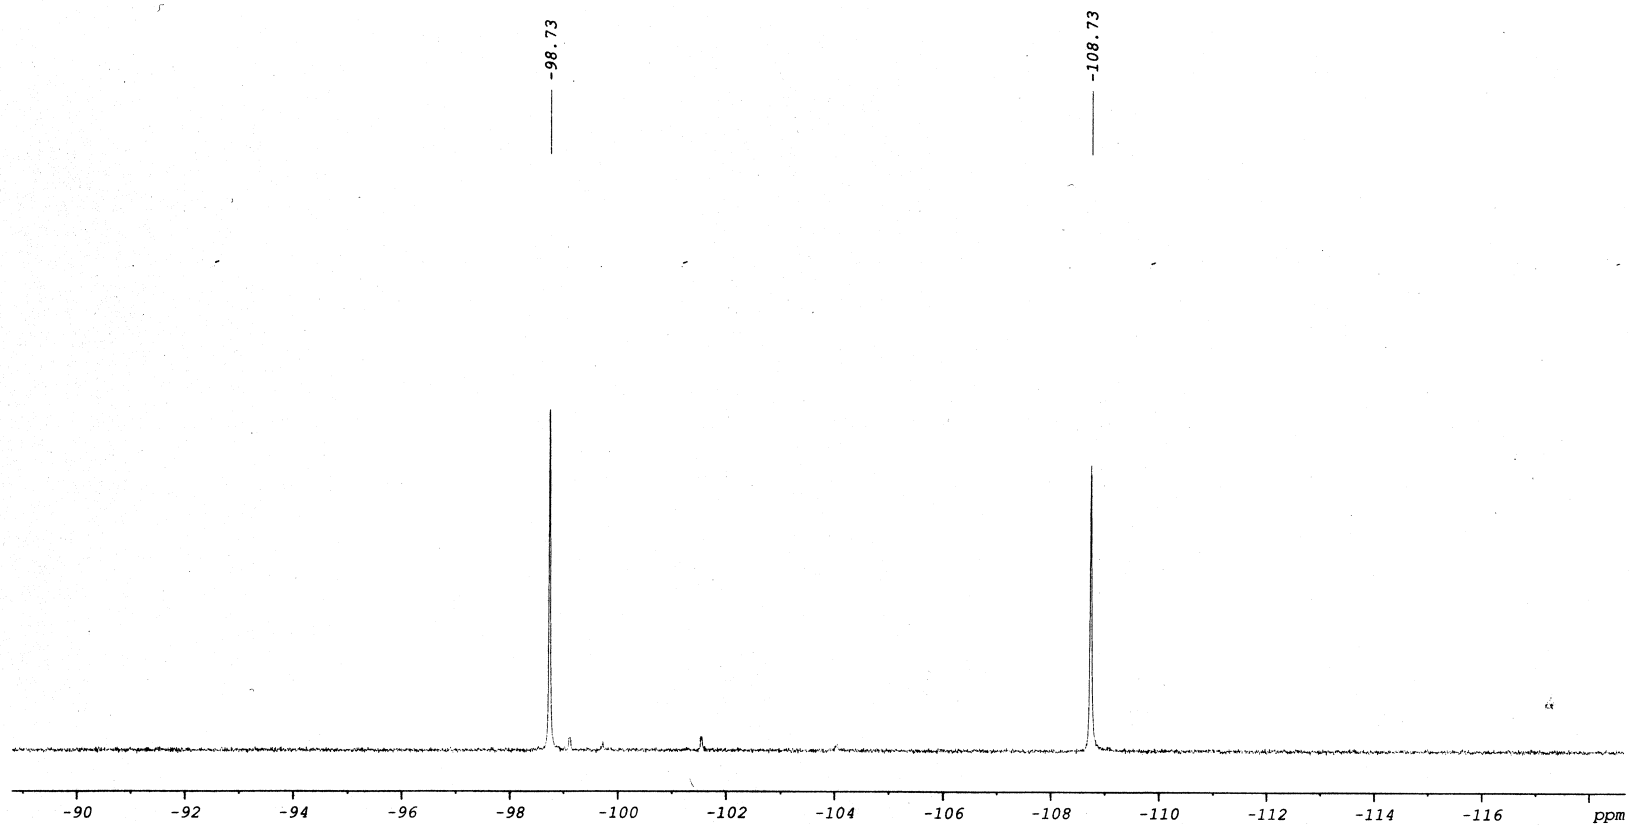

Figure 46.  $^{19}\text{F}$  NMR (470 MHz,  $\text{DMSO-}d_6$ ) spectra of compound **5e**

YUNNAN UNIVER. AV. DRX500  
yanglijuan YLJ-503-7g in DMSO

7i

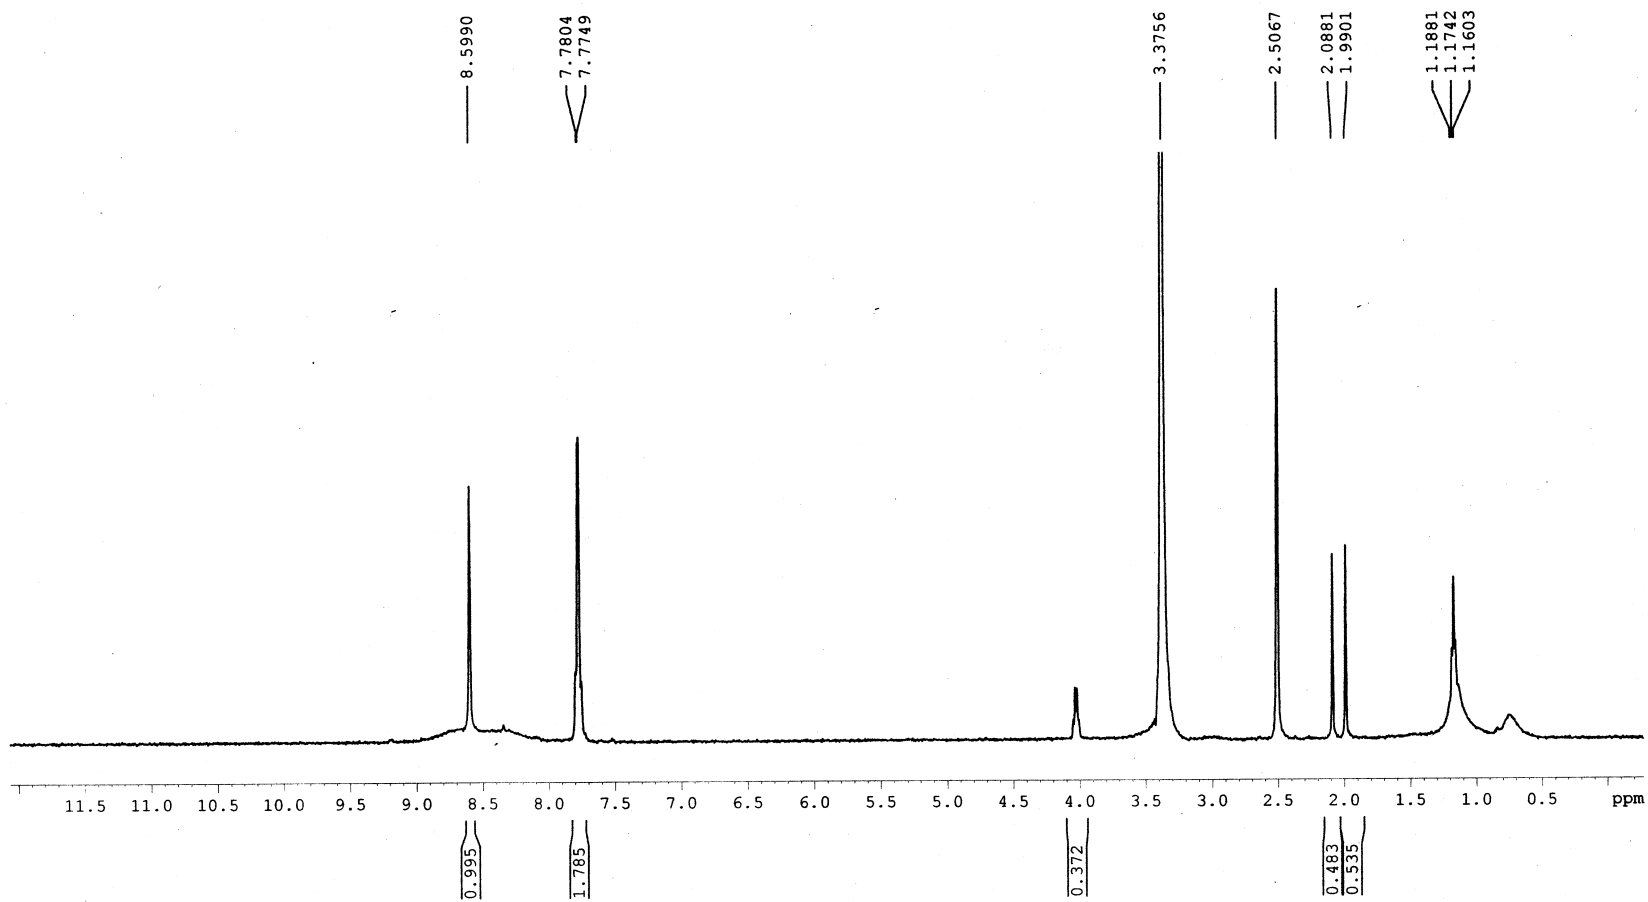

Figure 47.  $^1\text{H}$  NMR (500 MHz,  $\text{DMSO-}d_6$ ) spectra of compound **5f**

DEPT135

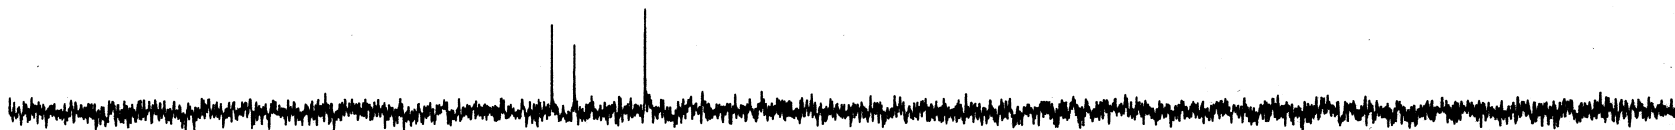

YUNNAN UNIVER. AV. DRX500  
yanglijuan LJ-503-7g in DMSO  
72

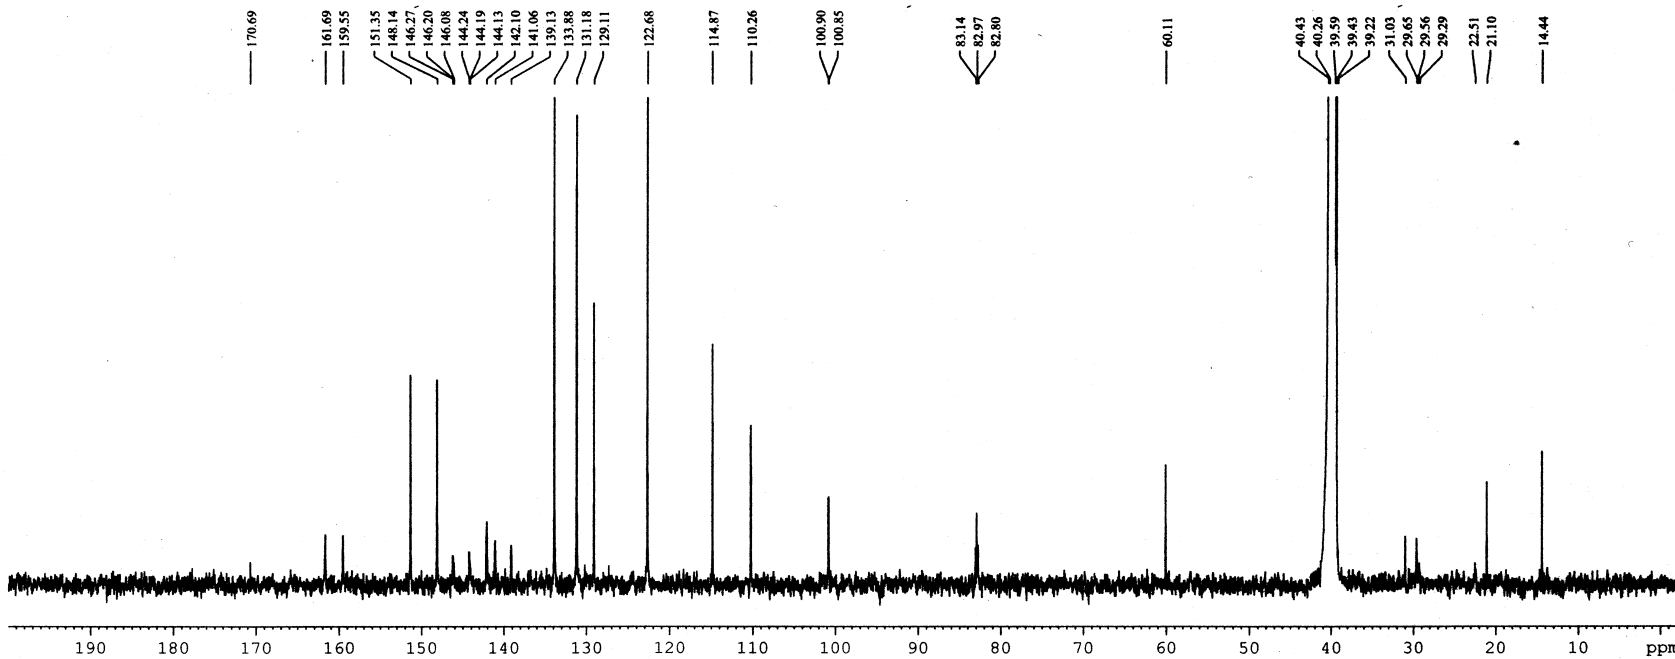

Figure 48. <sup>13</sup>C NMR (125 MHz, DMSO-*d*<sub>6</sub>) spectra of compound 5f

YUNNAN UNIVER. AV. DRX500  
yanglijuan 503-7~~g~~ in DMSO  
19F decoupling  $\gamma$

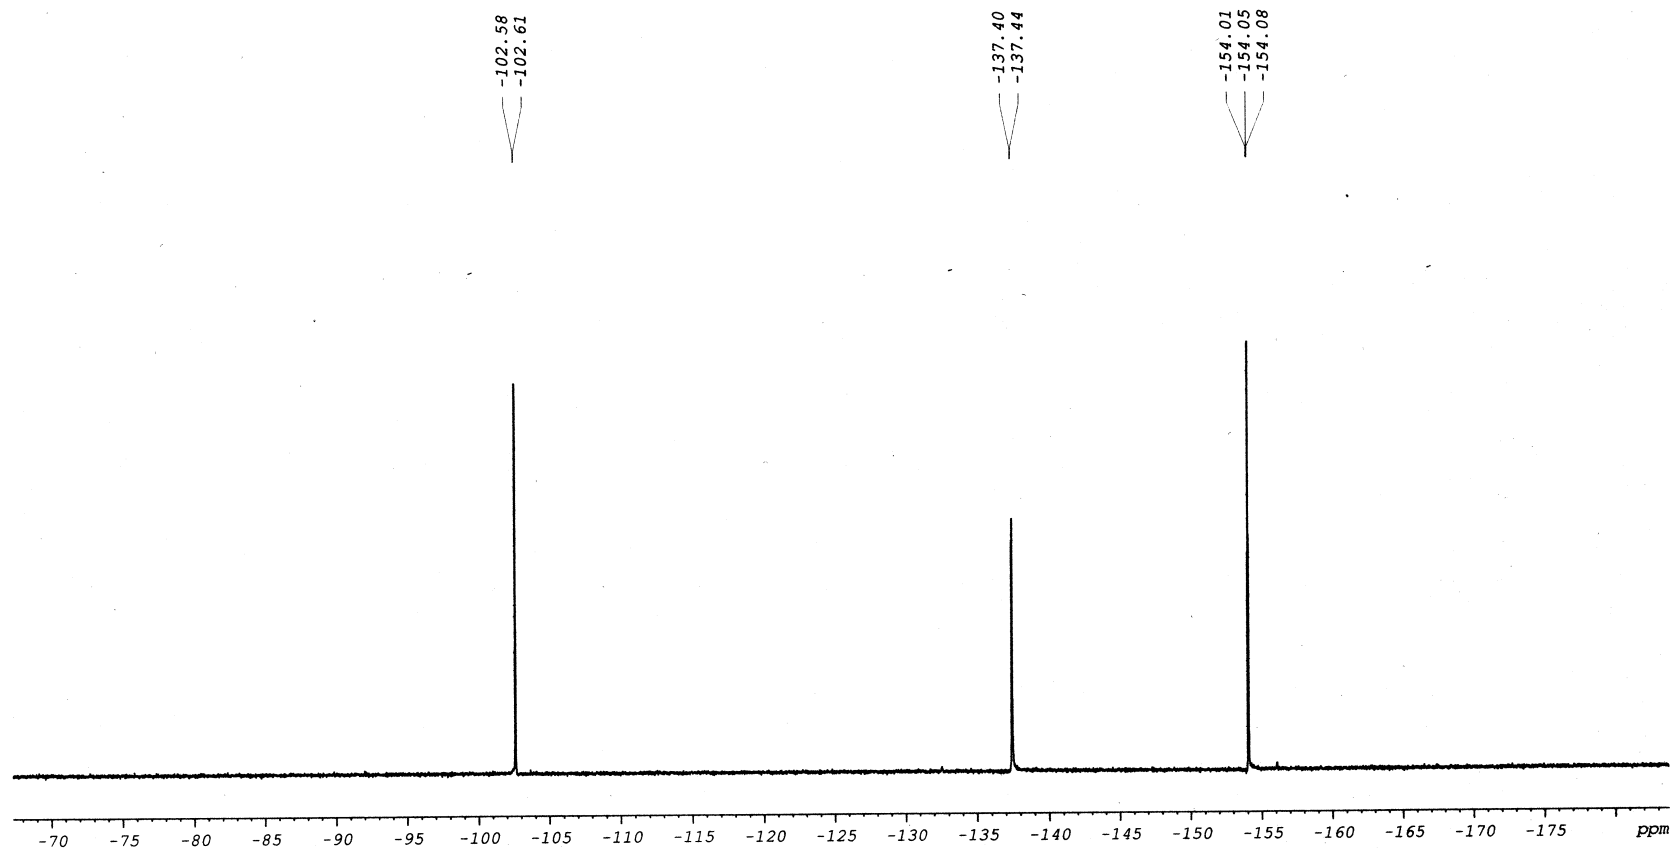

Figure 49.  $^{19}\text{F}$  NMR (470 MHz,  $\text{DMSO-}d_6$ ) spectra of compound 5f

YUNNAN UNIVER. AV. DRX500  
huangchao hc7i in DMF  
11011810

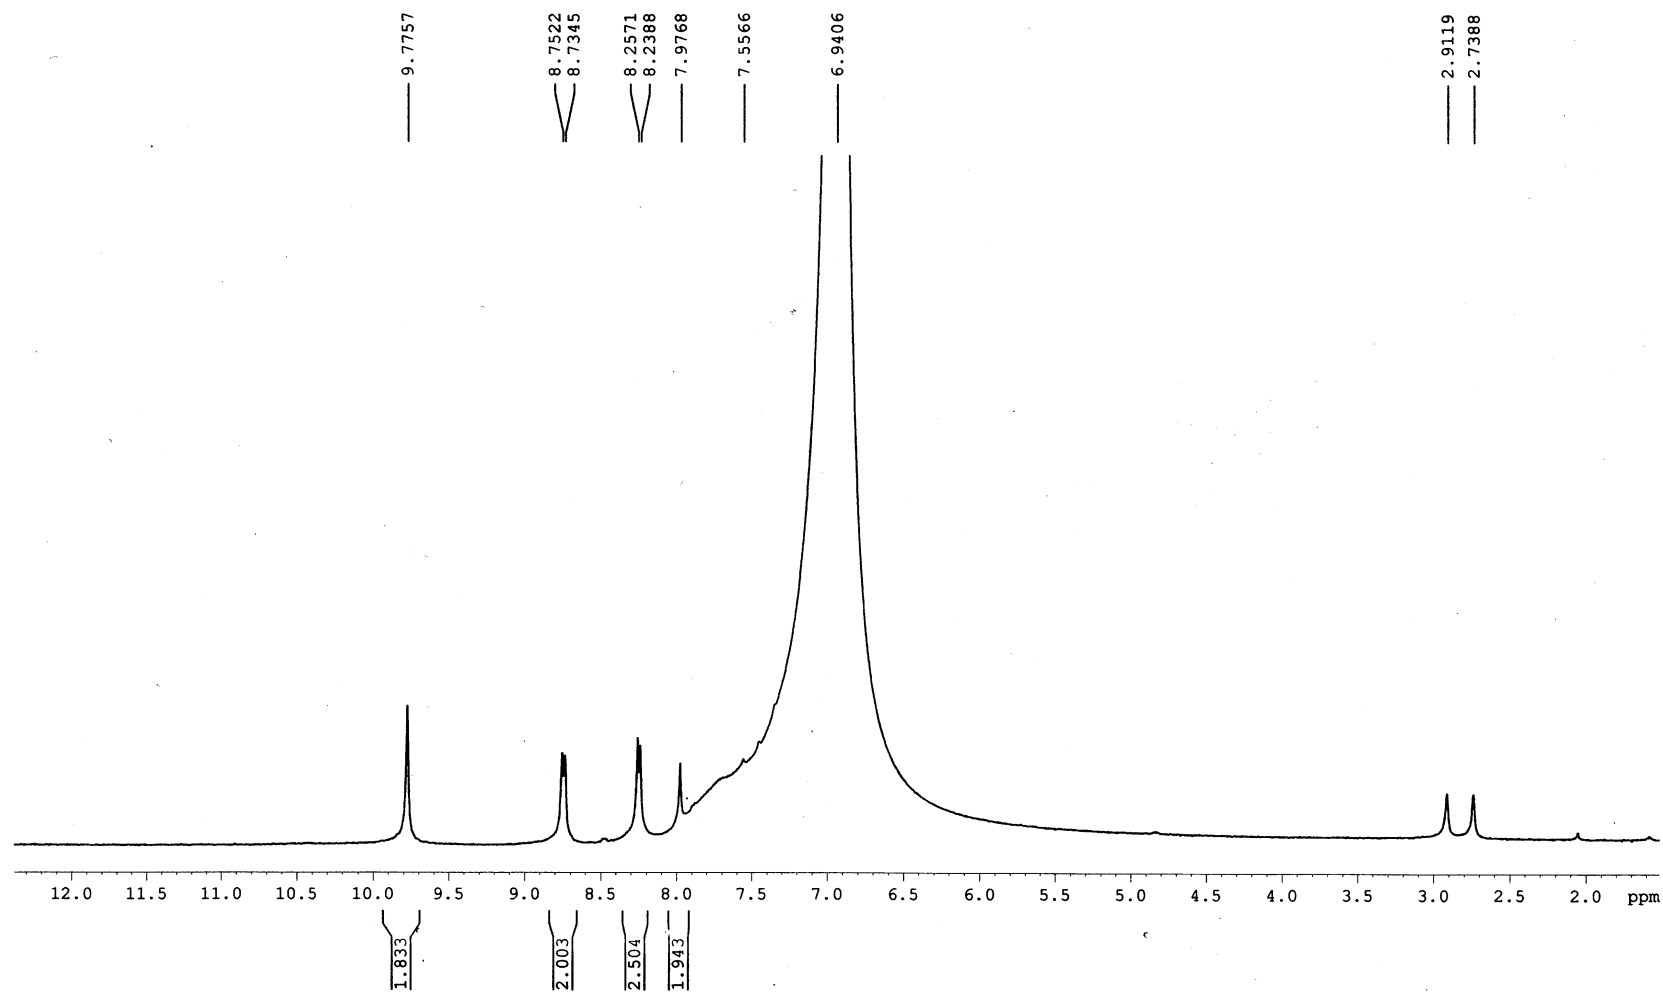

Figure 50. <sup>1</sup>H NMR (500 MHz, DMF-*d*<sub>6</sub>) spectra of compound 5i



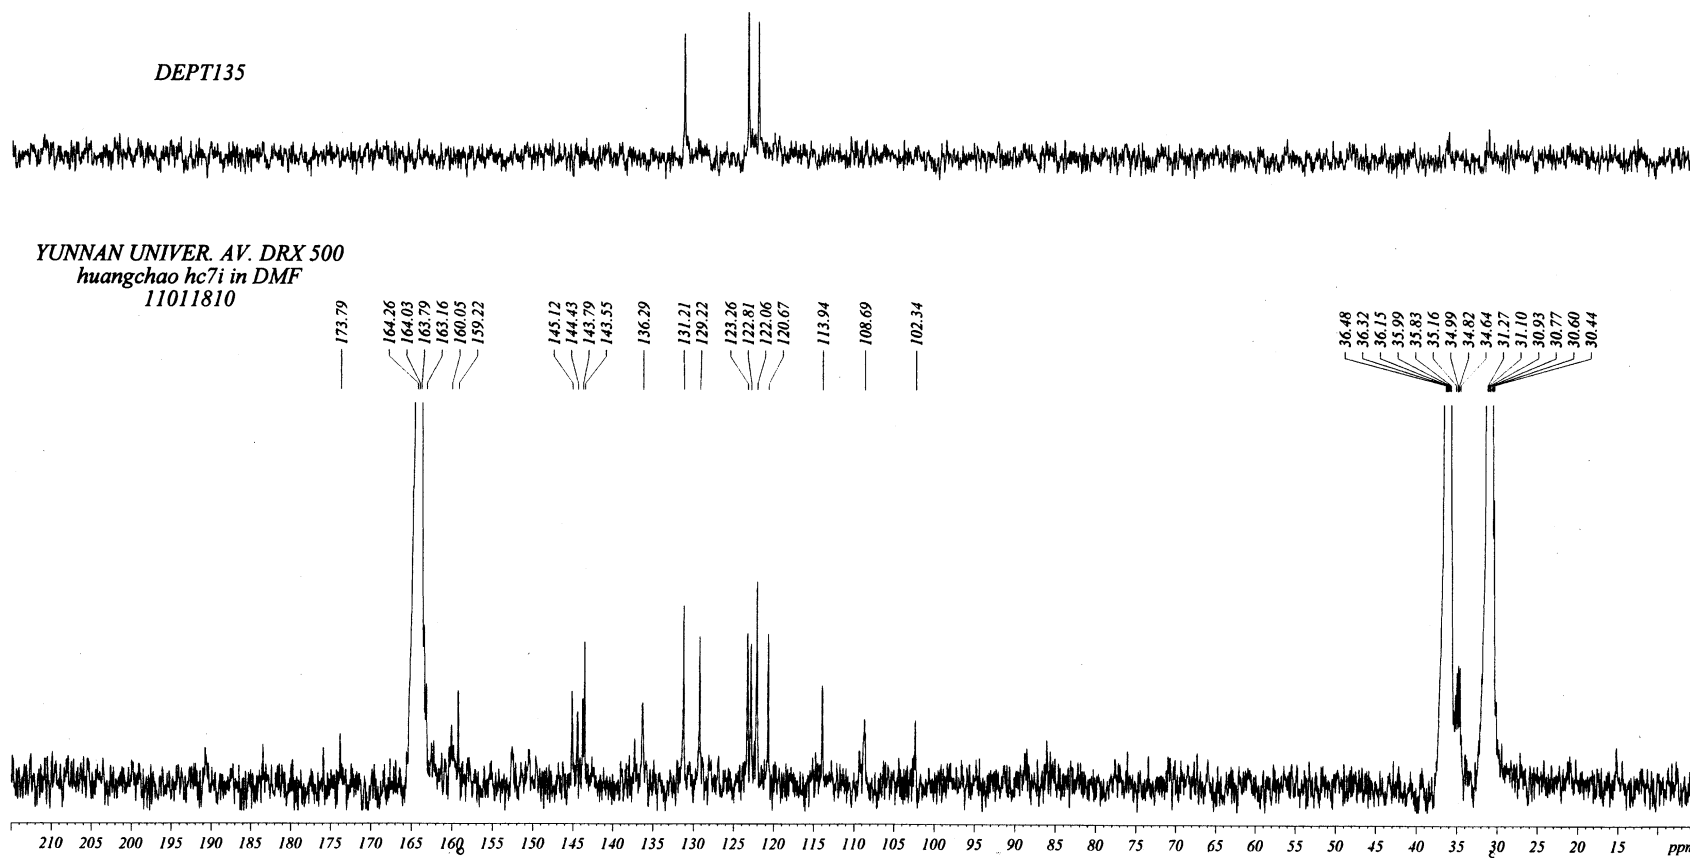

Figure 51.  $^{13}\text{C}$  NMR (125 MHz,  $\text{DMF-d}_6$ ) spectra of compound **5i**

YUNNAN UNIVER. AV. DRX500  
huangchao hc7i in DMF  
19F decoupling 11011810

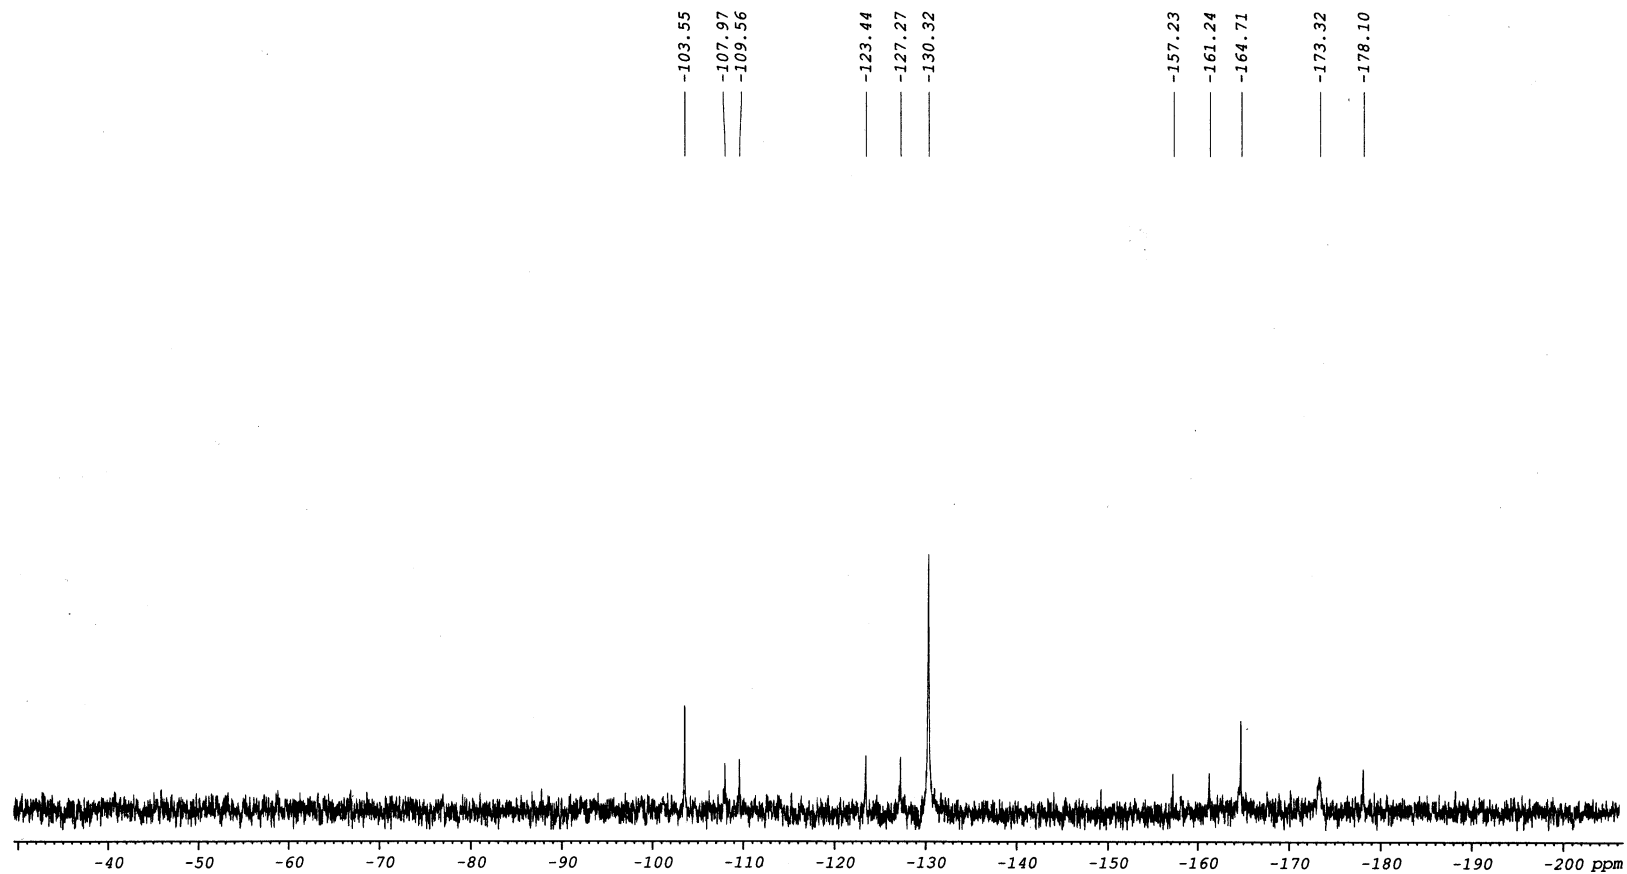

Figure 52.  $^{19}\text{F}$  NMR (470 MHz,  $\text{DMF-d}_6$ ) spectra of compound **5i**

YUNNAN UNIVER. AV. DRX500  
huangchao hc7j in DMF  
11011811

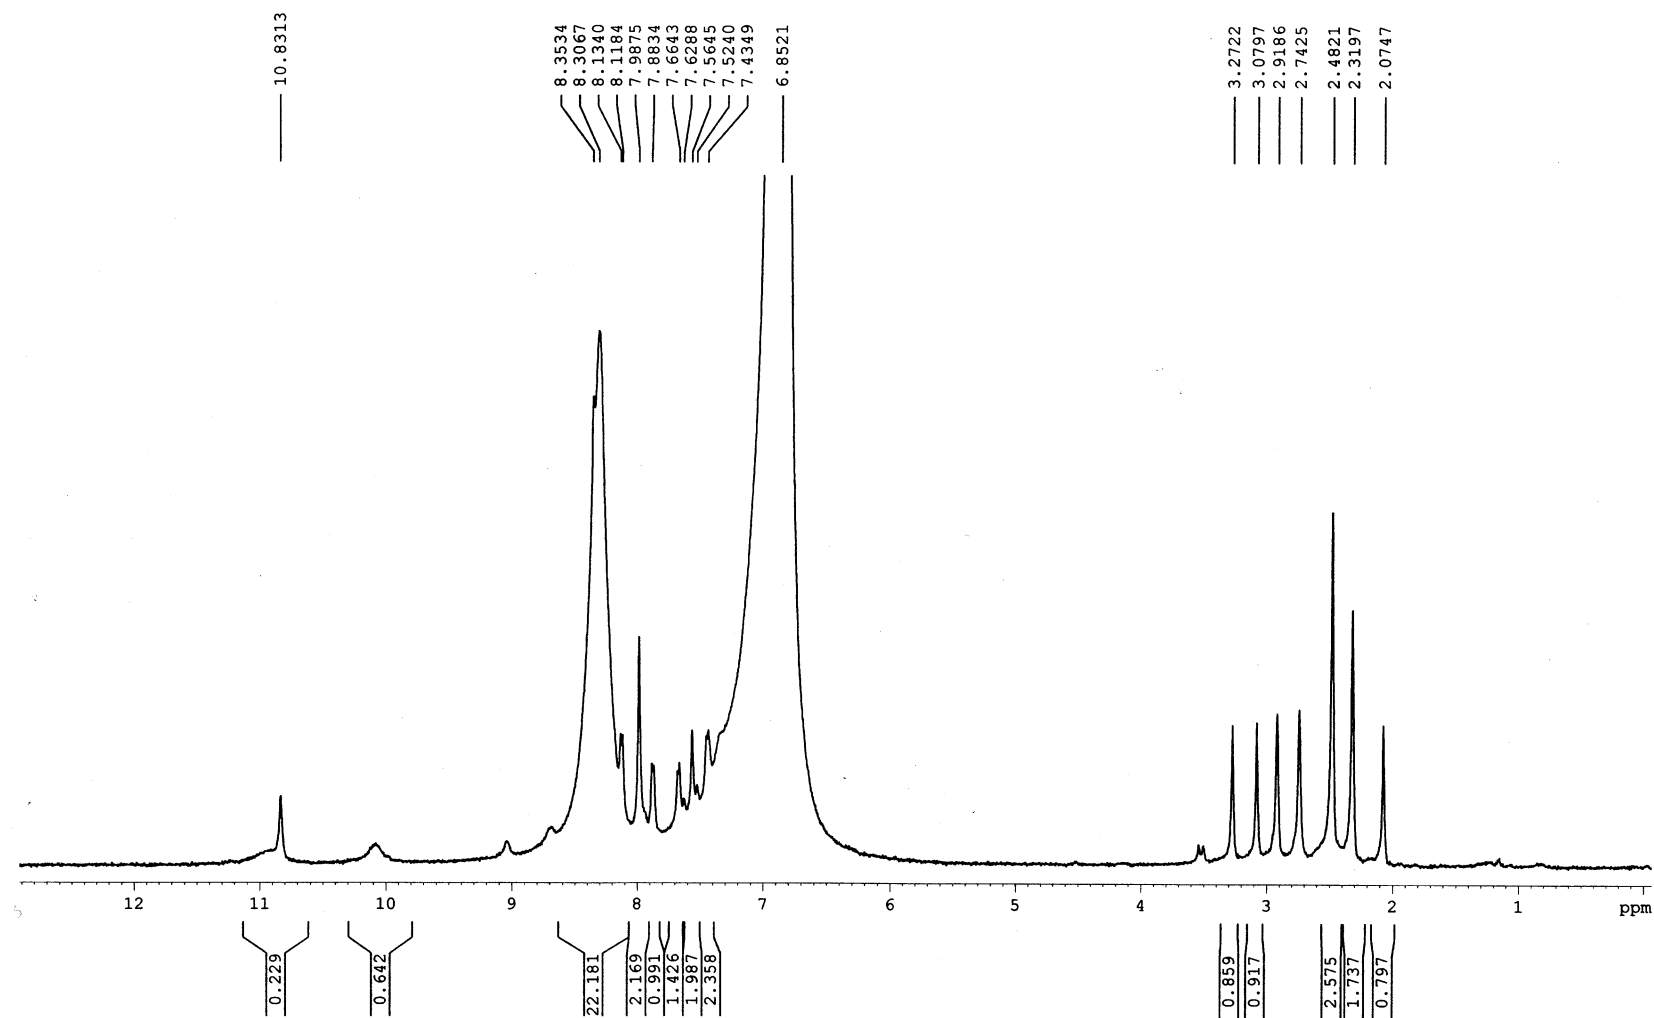

Figure 53.  $^1\text{H}$  NMR (500 MHz,  $\text{DMF-d}_6$ ) spectra of compound **5j**

DEPT135

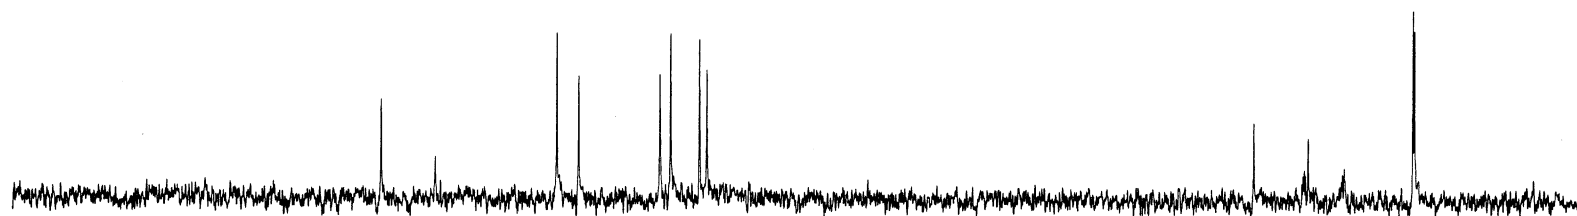

YUNNAN UNIVER. AV. DRX 500  
huangchao hc7j in DMF  
11011811

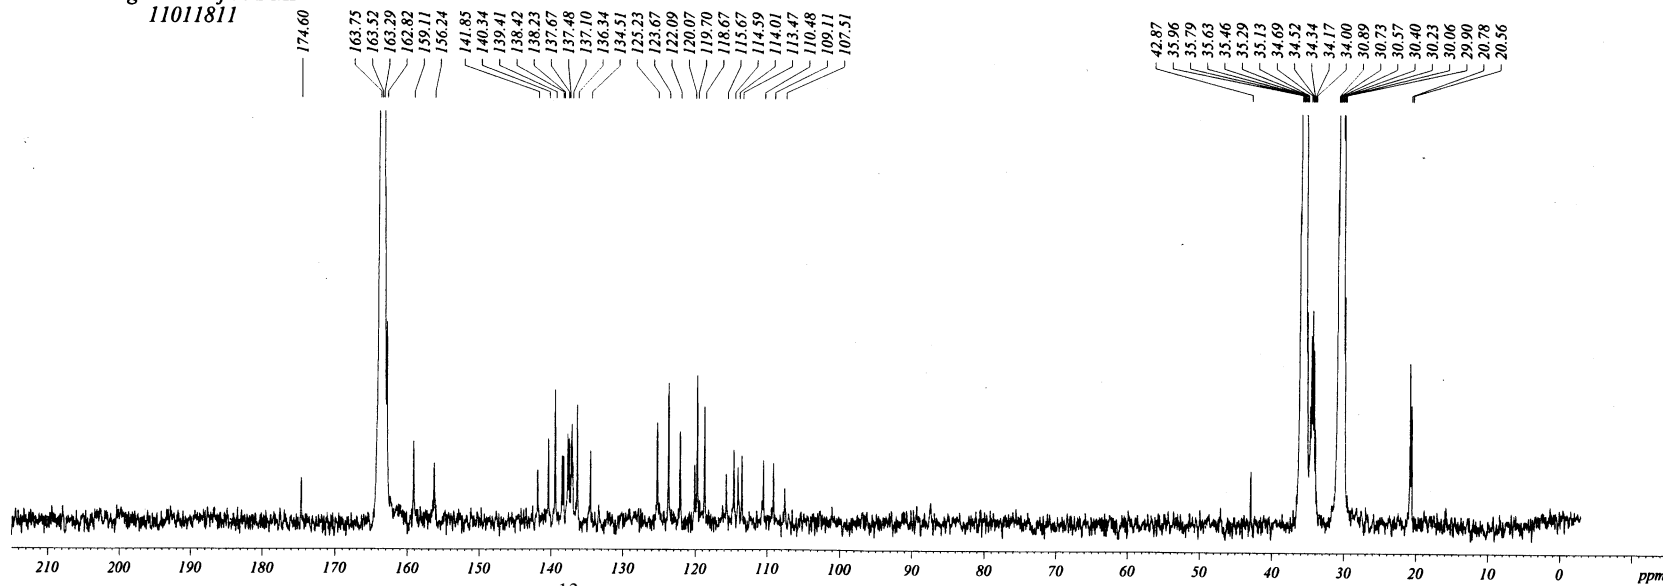

Figure 54.  $^{13}\text{C}$  NMR (125 MHz,  $\text{DMF-d}_6$ ) spectra of compound **5j**

YUNNAN UNIVER. AV. DRX500  
huangchao hc7k in DMF  
11011812

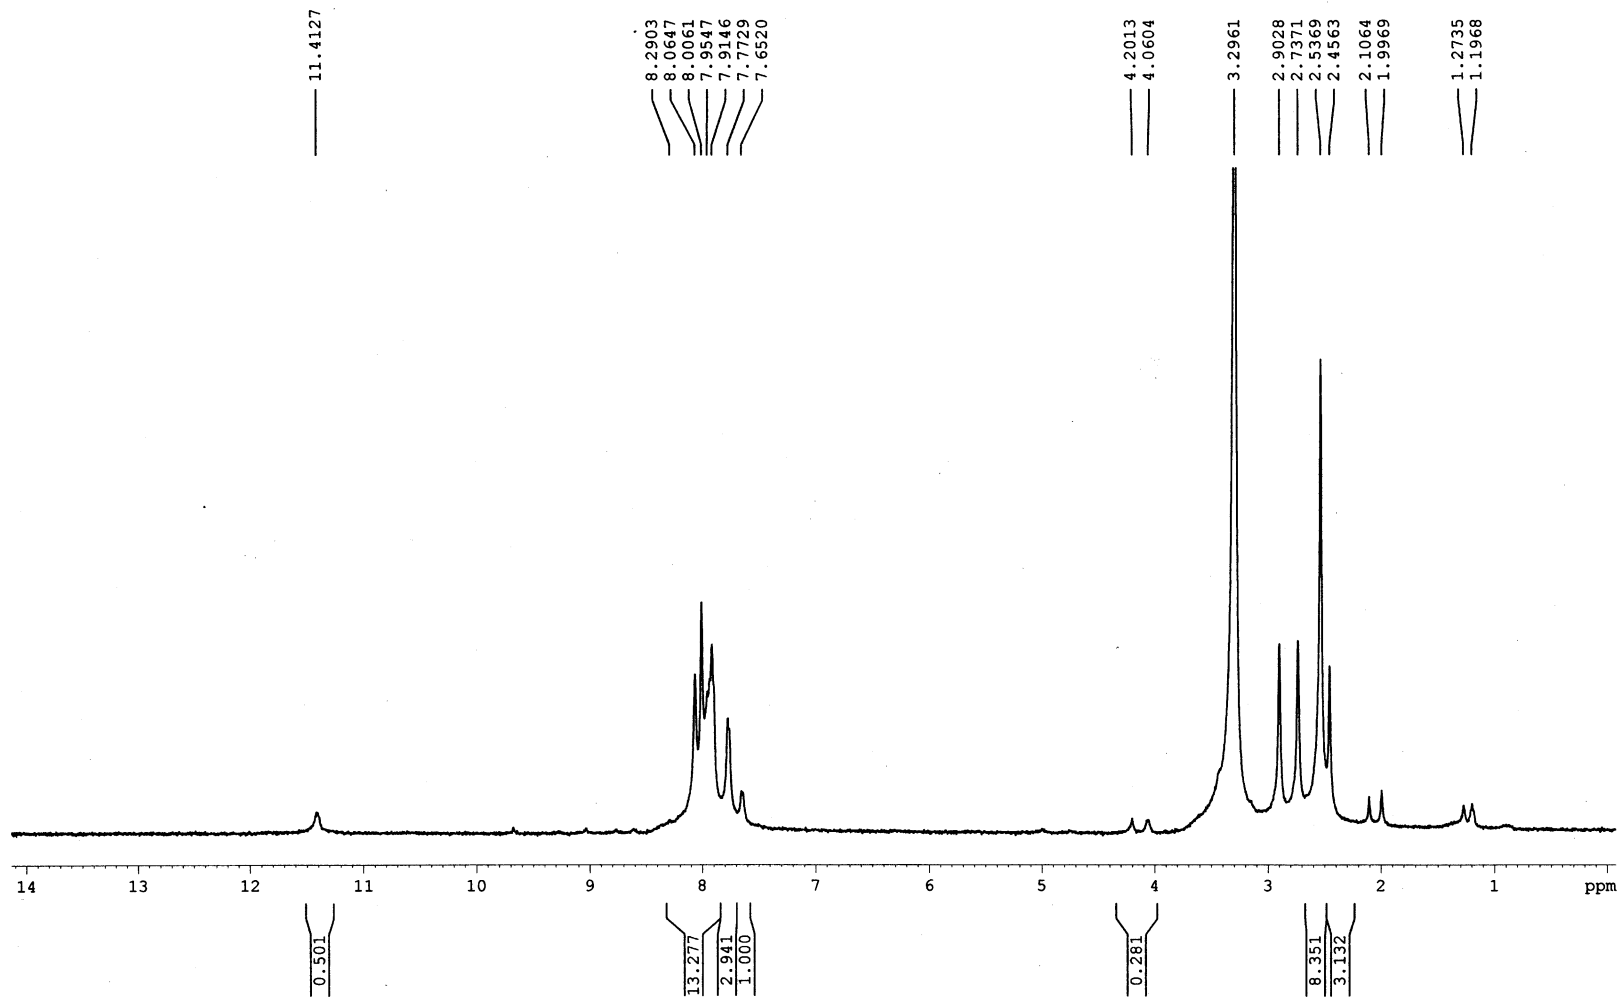

Figure 55.  $^1\text{H}$  NMR (500 MHz,  $\text{DMF}-d_6$ ) spectra of compound 5k

DEPT135

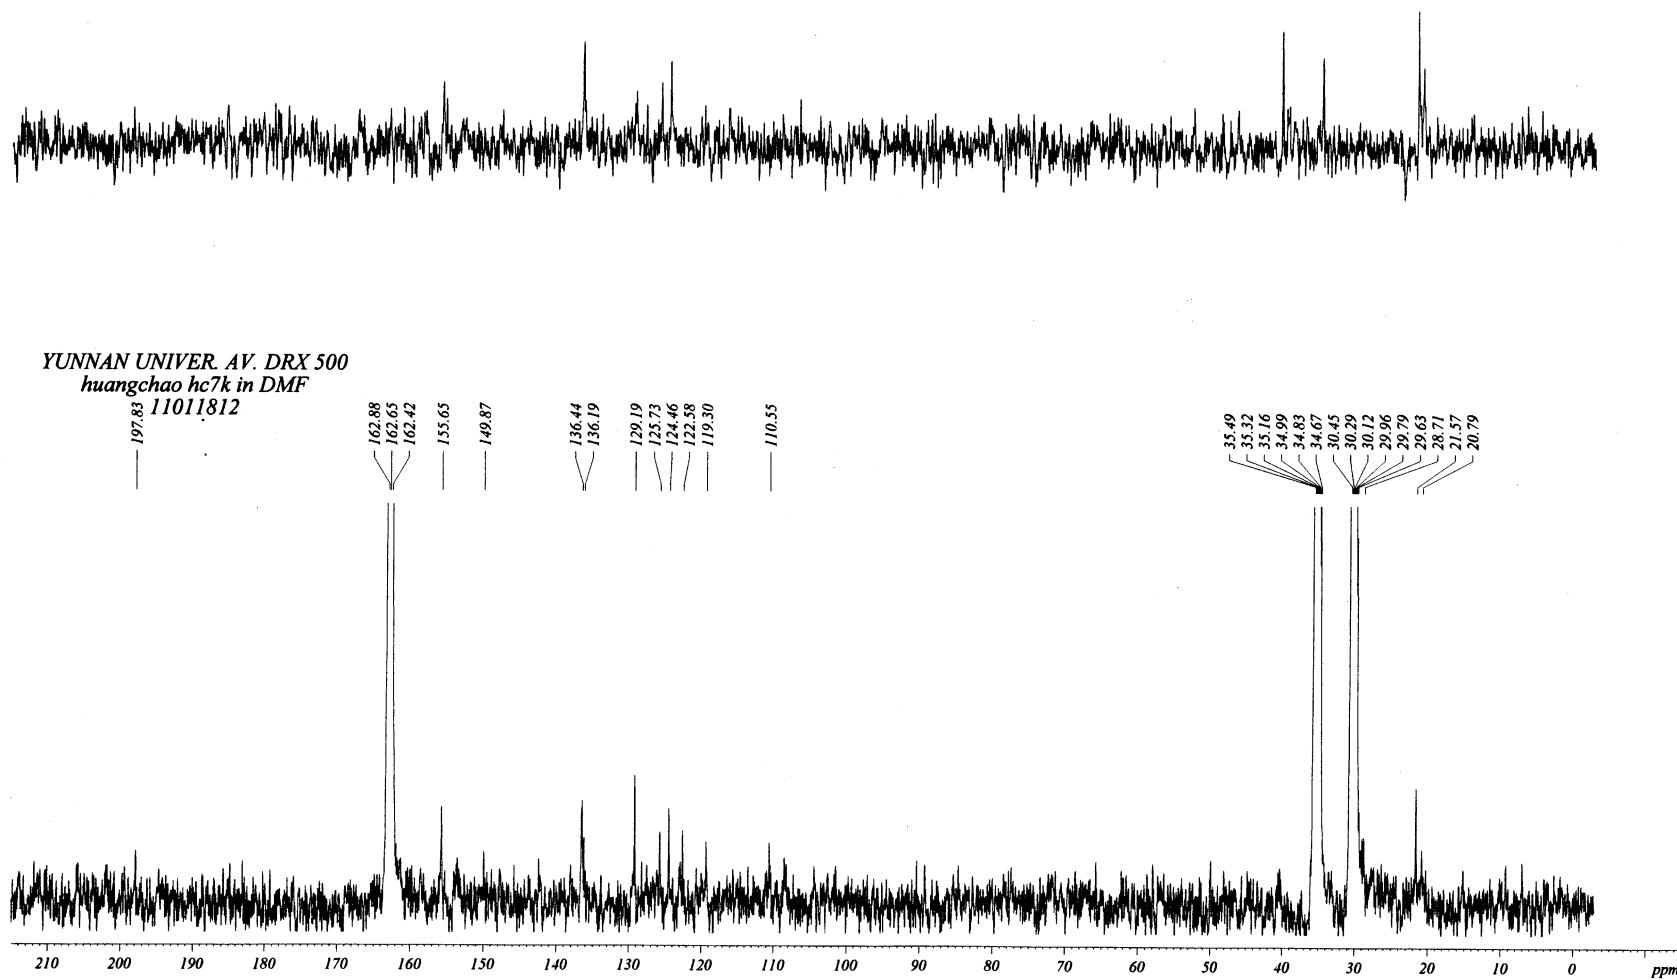

Figure 56.  $^{13}\text{C}$  NMR (125 MHz,  $\text{DMF-d}_6$ ) spectra of compound 5k

YUNNAN UNIVER. AV. DRX500  
huangchao hc7k in DMF  
19F decoupling 11011812

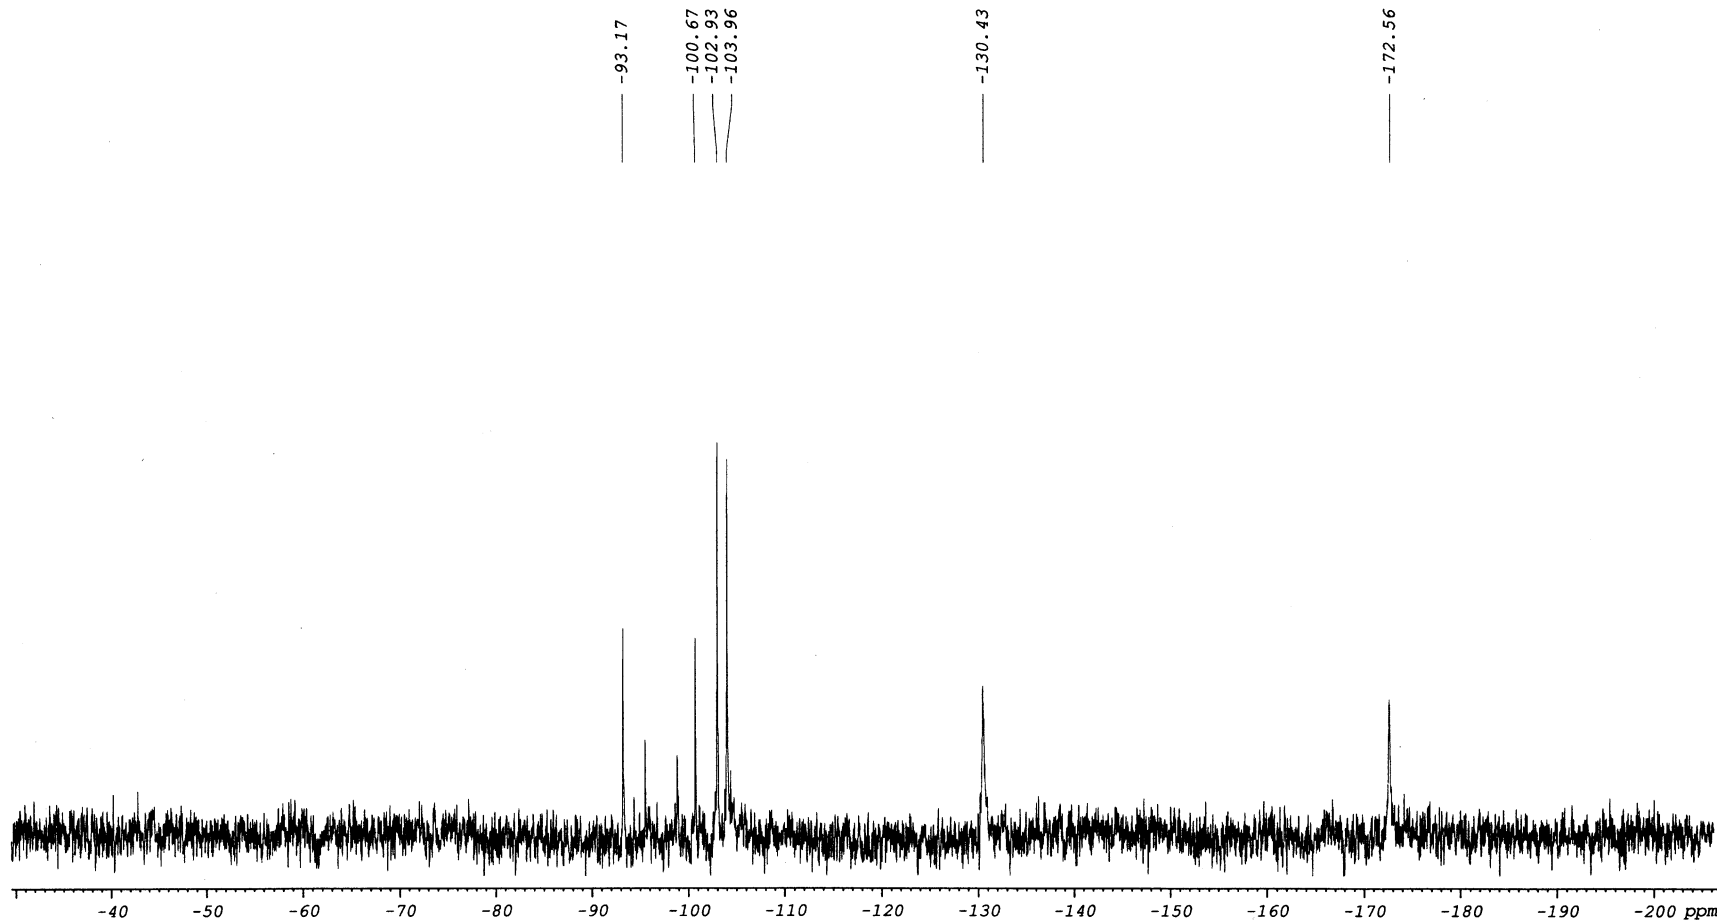

Figure 57.  $^{19}\text{F}$  NMR (470 MHz,  $\text{DMF-}d_6$ ) spectra of compound 5k

YUNNAN UNIVER. AV. DRX500  
huangchao hch71 in DMF  
10121003

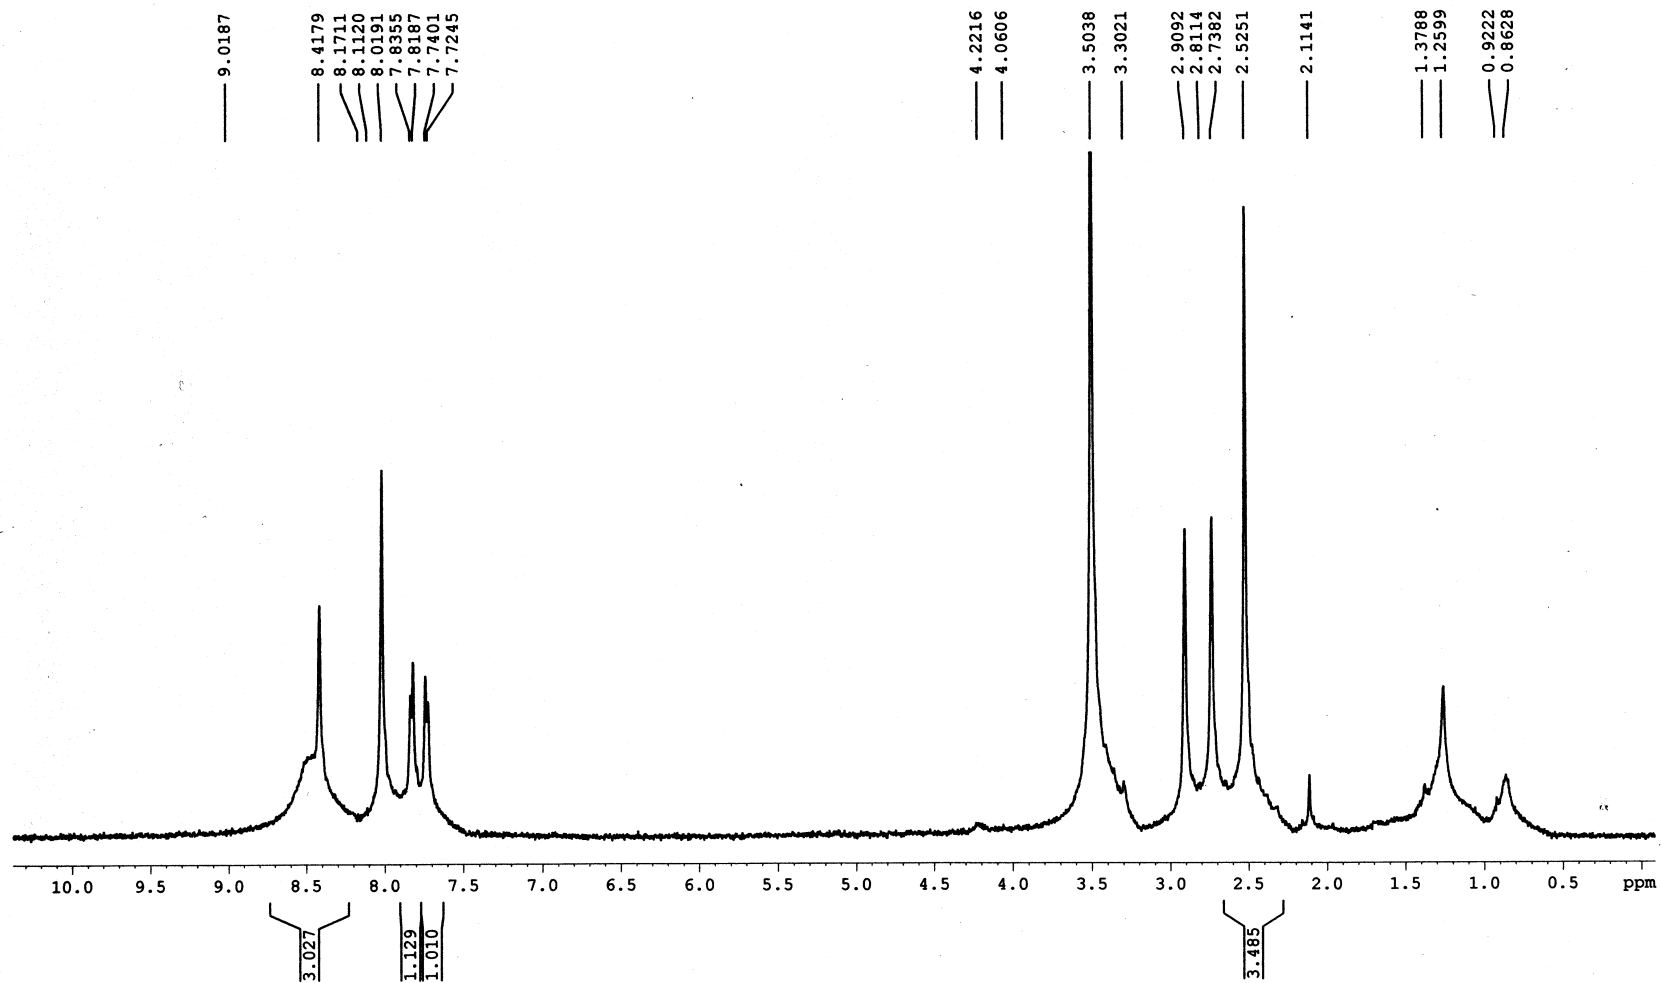

Figure 58.  $^1\text{H}$  NMR (500 MHz,  $\text{DMF-d}_6$ ) spectra of compound 51



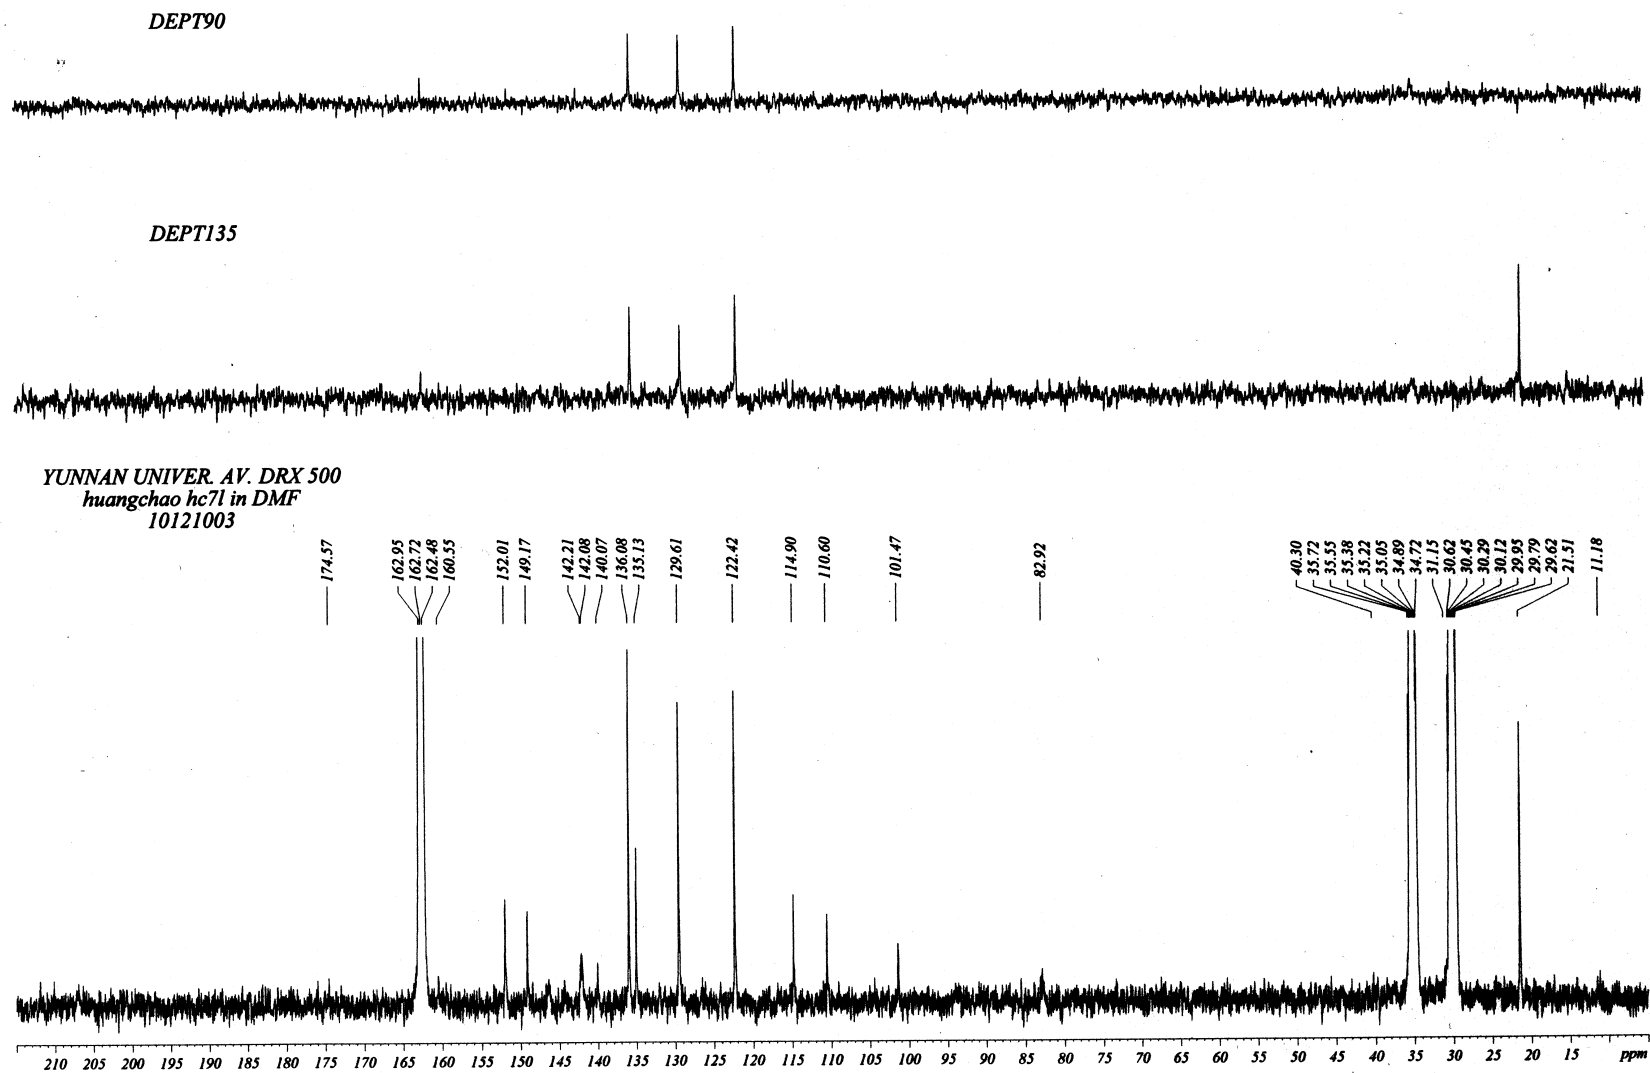

Figure 59.  $^{13}\text{C}$  NMR (125 MHz,  $\text{DMF-d}_6$ ) spectra of compound 51

YUNNAN UNIVER. AV. DRX500  
huangchao hc71 in DMF  
19F decoupling

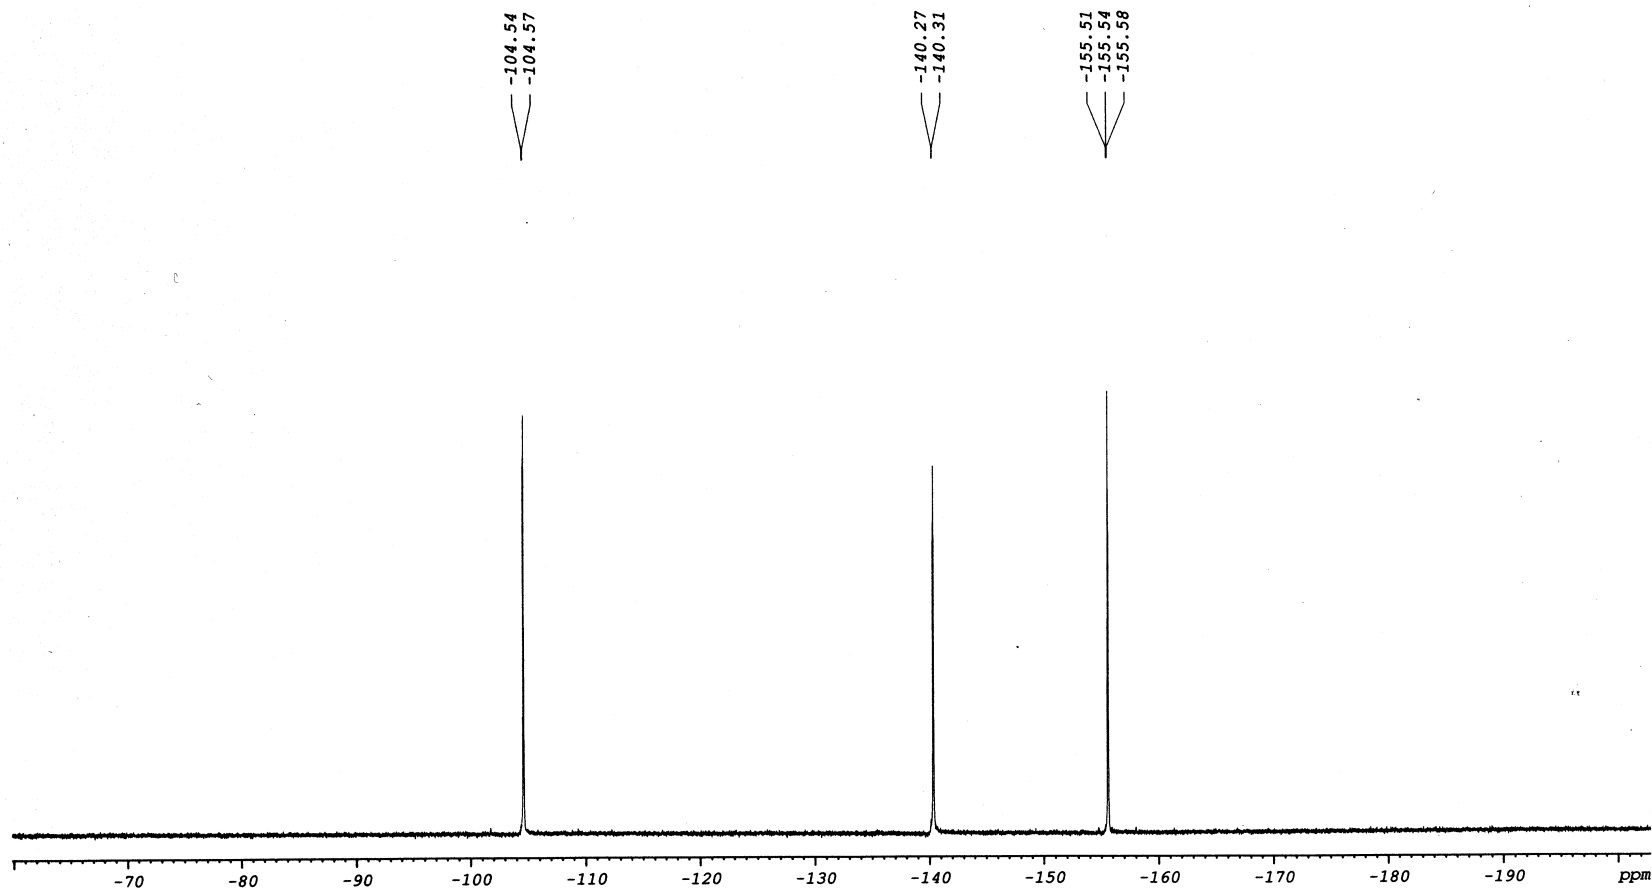

Figure 60.  $^{19}\text{F}$  NMR (470 MHz,  $\text{DMF-d}_6$ ) spectra of compound 51

## References

- 1、 Huang, C.; Yan, S. J.; Li, Y. M.; Huang, R.; Lin, J. *Bioorg. Med. Chem. Lett.* **2010**, 20, 4665–4669.
